# Supplementary material for: Defining cellular population dynamics at single cell resolution during prostate cancer progression
Source: bioRxiv preprint, doi:10.1101/2022.03.02.482711, version 1 (2022-03-04)
Supplement: Table S2 [file 482711_file03.xlsx]

## Sheet: S2 CellphoneDB PTEN
pair	clusters	pvalue	mean
KLRG2_WNT11	B-cells|Basal	1	-0.0709665
KLRG2_TNFSF9	B-cells|Basal	1	-0.176251
PVR_TNFSF9	B-cells|Basal	1	-0.347399
PVR_CD226	B-cells|Basal	1	-0.307573
PVR_NECTIN3	B-cells|Basal	1	-0.234465
CADM3_NECTIN3	B-cells|Basal	1	-0.018878
NECTIN2_NECTIN3	B-cells|Basal	1	-0.309359
CADM3_CADM4	B-cells|Basal	1	-0.104697
CD226_NECTIN2	B-cells|Basal	1	0.0565835
FGF2_FGFR1	B-cells|Basal	1	0.0384362
FGF2_FGFR3	B-cells|Basal	1	0.102994
FGF2_FGFRL1	B-cells|Basal	1	-0.0203404
TGFB1_TGFBR3	B-cells|Basal	1	0.547943
LAMP1_FAM3C	B-cells|Basal	1	-0.0634092
PDCD1_FAM3C	B-cells|Basal	1	0.260628
ADGRG5_FAM3C	B-cells|Basal	1	0.285698
CXCR3_CXCL9	B-cells|Basal	1	0.0214797
DPP4_CXCL9	B-cells|Basal	1	0.0257376
FCGR2A_CXCL9	B-cells|Basal	1	0.194087
EGFR_NRG1	B-cells|Basal	1	0.238787
ADGRL1_NRG1	B-cells|Basal	1	0.299831
ERBB3_NRG1	B-cells|Basal	1	0.240009
EGFR_EGF	B-cells|Basal	1	-0.347399
EGFR_TGFB1	B-cells|Basal	1	-0.0543923
EGFR_MIF	B-cells|Basal	1	0.24245
CD74_MIF	B-cells|Basal	0.0009	1.27858
EGFR_GRN	B-cells|Basal	1	-0.362158
TNFRSF1A_GRN	B-cells|Basal	1	-0.522841
TNFRSF1B_GRN	B-cells|Basal	1	-0.318326
EGFR_COPA	B-cells|Basal	1	-0.189351
CD74_COPA	B-cells|Basal	0.0009	1.08338
EGFR_EPGN	B-cells|Basal	1	0.15056
TNFRSF13B_TNFSF13B	B-cells|Basal	1	0.187768
TFRC_TNFSF13B	B-cells|Basal	1	-0.100051
CD40_TNFSF13B	B-cells|Basal	1	0.0648829
CD74_APP	B-cells|Basal	0.0009	1.23573
ICAM1_SPN	B-cells|Basal	1	-0.168123
ICAM1_ITGAL	B-cells|Basal	1	-0.16004
TNFRSF1A_FASLG	B-cells|Basal	1	-0.390245
TNFRSF10B_FASLG	B-cells|Basal	1	-0.0985055
ADORA2A_NAMPT	B-cells|Basal	1	0.130931
NRP1_VEGFA	B-cells|Basal	1	-0.0291463
NRP2_VEGFA	B-cells|Basal	1	-0.0365259
NRP1_PGF	B-cells|Basal	1	0.00288251
NRP2_PGF	B-cells|Basal	1	-0.00433459
FLT1_PGF	B-cells|Basal	1	0.102994
NRP1_VEGFB	B-cells|Basal	1	-0.0816138
FLT1_VEGFB	B-cells|Basal	1	0.0243197
ADRB2_VEGFB	B-cells|Basal	1	0.041243
NRP2_SEMA3F	B-cells|Basal	1	-0.0619024
GRN_SORT1	B-cells|Basal	1	-0.475936
COPA_SORT1	B-cells|Basal	0.992	-0.0892673
LGALS9_DAG1	B-cells|Basal	1	-0.00723157
PLXNB2_SEMA4C	B-cells|Basal	1	-0.341903
ICOSLG_ICOS	B-cells|Basal	1	-0.0247367
DPP4_CCL11	B-cells|Basal	1	-0.129734
CCR2_CCL11	B-cells|Basal	1	-0.184425
HLA-DRB1_OGN	B-cells|Basal	1	0.85599
NOTCH1_JAG2	B-cells|Basal	1	0.342555
NOTCH1_WNT4	B-cells|Basal	1	-0.027675
CCL24_CCR2	B-cells|Basal	1	-0.142417
CCL2_CCR2	B-cells|Basal	1	-0.182786
CCL2_ACKR1	B-cells|Basal	1	-0.147202
CCL5_ACKR1	B-cells|Basal	1	-0.229382
PF4_ACKR1	B-cells|Basal	1	-0.161653
CCL8_ACKR1	B-cells|Basal	1	-0.176251
CCL7_ACKR1	B-cells|Basal	1	-0.134477
CXCL10_DPP4	B-cells|Basal	1	-0.253257
CXCL2_DPP4	B-cells|Basal	1	-0.33825
PF4_CXCR3	B-cells|Basal	1	-0.134477
CXCL10_CXCR3	B-cells|Basal	1	-0.1976
CCL25_CCR9	B-cells|Basal	1	-0.0439433
LGALS9_LRP1	B-cells|Basal	1	-0.152003
PDGFB_LRP1	B-cells|Basal	1	-0.0439433
LGALS9_CD47	B-cells|Basal	1	-0.354759
SIRPA_CD47	B-cells|Basal	1	-0.174621
LGALS9_SLC1A5	B-cells|Basal	1	-0.311148
LGALS9_COLEC12	B-cells|Basal	1	-0.275786
LGALS9_HAVCR2	B-cells|Basal	1	-0.327348
LGALS9_MRC2	B-cells|Basal	1	-0.296899
PDGFB_PDGFRB	B-cells|Basal	1	-0.212568
PDGFB_PDGFRA	B-cells|Basal	1	-0.24127
WNT2_FZD2	B-cells|Basal	1	0.0257376
BMP7_SLAMF1	B-cells|Basal	1	-0.118727
PLXNB2_SEMA4D	B-cells|Basal	1	-0.463947
CD72_SEMA4D	B-cells|Basal	1	-0.16004
VEGFA_KDR	B-cells|Basal	1	-0.311148
TNFSF14_LTBR	B-cells|Basal	1	-0.0528949
TNFSF14_TNFRSF14	B-cells|Basal	1	-0.0528949
MIF_TNFRSF14	B-cells|Basal	1	-0.556393
MIF_TNFRSF10D	B-cells|Basal	1	-0.430509
CXCR6_CXCL16	B-cells|Basal	1	0.0648829
CCR2_CCL8	B-cells|Basal	1	-0.199255
CCR2_CCL7	B-cells|Basal	1	-0.232769
IDE_CCL23	B-cells|Basal	1	-0.298673
NRG1_LSR	B-cells|Basal	1	0.235114
NRG1_MS4A4A	B-cells|Basal	1	-0.205896
PLD2_ARF1	B-cells|Basal	1	0
SEMA4A_PLXND1	B-cells|Basal	1	-0.336428
CEACAM1_CEACAM8	B-cells|Basal	1	-0.668868
VEGFA_FLT1	B-cells|Basal	1	-0.325539
LRP6_CKLF	B-cells|Basal	1	-0.152003
COPA_P2RY6	B-cells|Basal	1	-0.265345
NAMPT_P2RY6	B-cells|Basal	1	-0.336428
C3_C3AR1	B-cells|Basal	1	-0.314733
ADORA2A_ENTPD1	B-cells|Basal	1	-0.0101344
ADORA2B_ENTPD1	B-cells|Basal	1	-0.195946
IL1B_ADRB2	B-cells|Basal	1	-0.0694519
TNFSF9_TNFRSF9	B-cells|Basal	1	-0.199255
TNFSF9_ADGRG5	B-cells|Basal	1	-0.139236
PROS1_AXL	B-cells|Basal	1	0.0257376
PROS1_TYRO3	B-cells|Basal	1	-0.117161
CSF1R_CSF3	B-cells|Basal	1	0.0854247
CSF1R_IL34	B-cells|Basal	1	-0.224317
PTPRC_CD22	B-cells|Basal	1	0.169925
PTPRC_MRC1	B-cells|Basal	1	0.112367
PDGFRB_PDGFD	B-cells|Basal	1	-0.161653
CTLA4_CD80	B-cells|Basal	1	0.0468403
CD28_CD86	B-cells|Basal	1	-0.100051
CTLA4_CD86	B-cells|Basal	1	-0.0159576
SELP_CD34	B-cells|Basal	1	-0.169745
SELP_SELPLG	B-cells|Basal	1	-0.263612
PDGFRA_PDGFC	B-cells|Basal	1	0.149259
FLT4_PDGFC	B-cells|Basal	1	0.168642
PECAM1_CD38	B-cells|Basal	1	-0.246395
C5AR1_RPS19	B-cells|Basal	1	0.264236
AXL_IL15RA	B-cells|Basal	1	-0.14401
FLT3_FLT3LG	B-cells|Basal	1	-0.0291463
LTBR_LTB	B-cells|Basal	1	-0.413115
CMKLR1_RARRES2	B-cells|Basal	1	-0.22095
CX3CR1_CX3CL1	B-cells|Basal	1	-0.0709665
LILRA4_BST2	B-cells|Basal	1	-0.172994
TEK_ANGPT4	B-cells|Basal	1	-0.100051
CD47_SIRPG	B-cells|Basal	1	-0.184425
ESAM_ESAM	B-cells|Basal	1	-0.16004
KLRG2_WNT11	B-cells|CD8	1	-0.163268
KLRG2_TNFSF9	B-cells|CD8	1	-0.150401
PVR_TNFSF9	B-cells|CD8	1	-0.318326
PVR_CD226	B-cells|CD8	1	-0.0101344
PVR_NECTIN3	B-cells|CD8	1	-0.364013
CADM3_NECTIN3	B-cells|CD8	1	-0.129734
NECTIN2_NECTIN3	B-cells|CD8	1	-0.446148
CADM3_CADM4	B-cells|CD8	1	-0.174621
CD226_NECTIN2	B-cells|CD8	1	-0.416962
FGF2_FGFR1	B-cells|CD8	1	-0.217591
FGF2_FGFR3	B-cells|CD8	1	-0.171368
FGF2_FGFRL1	B-cells|CD8	1	-0.171368
TGFB1_TGFBR3	B-cells|CD8	1	0.436162
LAMP1_FAM3C	B-cells|CD8	1	-0.713119
PDCD1_FAM3C	B-cells|CD8	1	-0.231075
ADGRG5_FAM3C	B-cells|CD8	1	-0.195946
CXCR3_CXCL9	B-cells|CD8	1	-0.112475
DPP4_CXCL9	B-cells|CD8	1	-0.109359
FCGR2A_CXCL9	B-cells|CD8	1	0.0758749
EGFR_NRG1	B-cells|CD8	1	-0.316528
ADGRL1_NRG1	B-cells|CD8	1	-0.226004
ERBB3_NRG1	B-cells|CD8	1	-0.312939
EGFR_EGF	B-cells|CD8	1	-0.397828
EGFR_TGFB1	B-cells|CD8	1	0.212881
EGFR_MIF	B-cells|CD8	1	-0.58208
CD74_MIF	B-cells|CD8	0.0009	0.933573
EGFR_GRN	B-cells|CD8	1	-0.741783
TNFRSF1A_GRN	B-cells|CD8	1	-0.951764
TNFRSF1B_GRN	B-cells|CD8	1	-0.685014
EGFR_COPA	B-cells|CD8	1	-0.440263
CD74_COPA	B-cells|CD8	1	0.9855
EGFR_EPGN	B-cells|CD8	1	-0.251539
TNFRSF13B_TNFSF13B	B-cells|CD8	1	0.204141
TFRC_TNFSF13B	B-cells|CD8	1	-0.0800879
CD40_TNFSF13B	B-cells|CD8	1	0.0827026
CD74_APP	B-cells|CD8	1	0.879706
ICAM1_SPN	B-cells|CD8	1	0.381837
ICAM1_ITGAL	B-cells|CD8	1	0.40163
TNFRSF1A_FASLG	B-cells|CD8	1	0.529071
TNFRSF10B_FASLG	B-cells|CD8	1	0.691534
ADORA2A_NAMPT	B-cells|CD8	1	-0.0954196
NRP1_VEGFA	B-cells|CD8	1	-0.367732
NRP2_VEGFA	B-cells|CD8	1	-0.37707
NRP1_PGF	B-cells|CD8	1	-0.217591
NRP2_PGF	B-cells|CD8	1	-0.227692
FLT1_PGF	B-cells|CD8	1	-0.101598
NRP1_VEGFB	B-cells|CD8	1	-0.275786
FLT1_VEGFB	B-cells|CD8	1	-0.155213
ADRB2_VEGFB	B-cells|CD8	1	-0.137648
NRP2_SEMA3F	B-cells|CD8	1	-0.251539
GRN_SORT1	B-cells|CD8	1	-0.852042
COPA_SORT1	B-cells|CD8	1	-0.367732
LGALS9_DAG1	B-cells|CD8	1	-0.621488
PLXNB2_SEMA4C	B-cells|CD8	1	-0.388355
ICOSLG_ICOS	B-cells|CD8	1	1.06626
DPP4_CCL11	B-cells|CD8	1	-0.123434
CCR2_CCL11	B-cells|CD8	1	-0.179515
HLA-DRB1_OGN	B-cells|CD8	1	0.835116
NOTCH1_JAG2	B-cells|CD8	1	-0.279284
NOTCH1_WNT4	B-cells|CD8	1	-0.388355
CCL24_CCR2	B-cells|CD8	1	0.0799754
CCL2_CCR2	B-cells|CD8	1	0.045443
CCL2_ACKR1	B-cells|CD8	1	-0.123434
CCL5_ACKR1	B-cells|CD8	1	-0.204233
PF4_ACKR1	B-cells|CD8	1	-0.136062
CCL8_ACKR1	B-cells|CD8	1	-0.152003
CCL7_ACKR1	B-cells|CD8	1	-0.109359
CXCL10_DPP4	B-cells|CD8	1	-0.195946
CXCL2_DPP4	B-cells|CD8	1	-0.277534
PF4_CXCR3	B-cells|CD8	1	0.258217
CXCL10_CXCR3	B-cells|CD8	1	0.210389
CCL25_CCR9	B-cells|CD8	1	-0.0588937
LGALS9_LRP1	B-cells|CD8	1	-0.510457
PDGFB_LRP1	B-cells|CD8	1	-0.373327
LGALS9_CD47	B-cells|CD8	1	-0.242977
SIRPA_CD47	B-cells|CD8	1	-0.07552
LGALS9_SLC1A5	B-cells|CD8	1	-0.249822
LGALS9_COLEC12	B-cells|CD8	1	-0.403542
LGALS9_HAVCR2	B-cells|CD8	1	-0.239566
LGALS9_MRC2	B-cells|CD8	1	-0.296899
PDGFB_PDGFRB	B-cells|CD8	1	-0.212568
PDGFB_PDGFRA	B-cells|CD8	1	-0.244685
WNT2_FZD2	B-cells|CD8	1	-0.161653
BMP7_SLAMF1	B-cells|CD8	1	0.177599
PLXNB2_SEMA4D	B-cells|CD8	1	-0.293359
CD72_SEMA4D	B-cells|CD8	1	-0.018878
VEGFA_KDR	B-cells|CD8	1	-0.316528
TNFSF14_LTBR	B-cells|CD8	1	-0.311148
TNFSF14_TNFRSF14	B-cells|CD8	1	0.0370307
MIF_TNFRSF14	B-cells|CD8	1	-0.428566
MIF_TNFRSF10D	B-cells|CD8	1	-0.739372
CXCR6_CXCL16	B-cells|CD8	1	-0.612637
CCR2_CCL8	B-cells|CD8	1	-0.1976
CCR2_CCL7	B-cells|CD8	1	-0.242977
IDE_CCL23	B-cells|CD8	1	-0.321928
NRG1_LSR	B-cells|CD8	1	-0.610433
NRG1_MS4A4A	B-cells|CD8	1	1.23389
PLD2_ARF1	B-cells|CD8	1	-0.390245
SEMA4A_PLXND1	B-cells|CD8	1	-0.332789
CEACAM1_CEACAM8	B-cells|CD8	1	-1.13289
VEGFA_FLT1	B-cells|CD8	1	-0.281036
LRP6_CKLF	B-cells|CD8	1	-0.086201
COPA_P2RY6	B-cells|CD8	1	-0.261881
NAMPT_P2RY6	B-cells|CD8	1	-0.332789
C3_C3AR1	B-cells|CD8	1	-0.321928
ADORA2A_ENTPD1	B-cells|CD8	1	0.0690147
ADORA2B_ENTPD1	B-cells|CD8	1	-0.106249
IL1B_ADRB2	B-cells|CD8	1	-0.236164
TNFSF9_TNFRSF9	B-cells|CD8	1	0.751035
TNFSF9_ADGRG5	B-cells|CD8	1	0.0172093
PROS1_AXL	B-cells|CD8	1	-0.309359
PROS1_TYRO3	B-cells|CD8	1	-0.231075
CSF1R_CSF3	B-cells|CD8	1	-0.293359
CSF1R_IL34	B-cells|CD8	1	-0.229382
PTPRC_CD22	B-cells|CD8	1	0.167358
PTPRC_MRC1	B-cells|CD8	1	0.0867838
PDGFRB_PDGFD	B-cells|CD8	1	-0.195946
CTLA4_CD80	B-cells|CD8	1	0.0989585
CD28_CD86	B-cells|CD8	1	-0.0619024
CTLA4_CD86	B-cells|CD8	1	0.0200577
SELP_CD34	B-cells|CD8	1	-0.207561
SELP_SELPLG	B-cells|CD8	1	0.738984
PDGFRA_PDGFC	B-cells|CD8	1	-0.187707
FLT4_PDGFC	B-cells|CD8	1	-0.164884
PECAM1_CD38	B-cells|CD8	1	-0.12658
C5AR1_RPS19	B-cells|CD8	1	0.116365
AXL_IL15RA	B-cells|CD8	1	-0.260152
FLT3_FLT3LG	B-cells|CD8	1	0.171207
LTBR_LTB	B-cells|CD8	1	0.701327
CMKLR1_RARRES2	B-cells|CD8	1	-0.21424
CX3CR1_CX3CL1	B-cells|CD8	1	-0.365871
LILRA4_BST2	B-cells|CD8	1	-0.327348
TEK_ANGPT4	B-cells|CD8	1	-0.106249
CD47_SIRPG	B-cells|CD8	1	-0.184425
ESAM_ESAM	B-cells|CD8	1	-0.187707
KLRG2_WNT11	B-cells|DC	1	0.486457
KLRG2_TNFSF9	B-cells|DC	1	0.257011
PVR_TNFSF9	B-cells|DC	1	0.132248
PVR_CD226	B-cells|DC	1	-0.0664274
PVR_NECTIN3	B-cells|DC	1	-0.364013
CADM3_NECTIN3	B-cells|DC	1	-0.129734
NECTIN2_NECTIN3	B-cells|DC	1	-0.446148
CADM3_CADM4	B-cells|DC	1	-0.164884
CD226_NECTIN2	B-cells|DC	1	-0.358454
FGF2_FGFR1	B-cells|DC	1	-0.0634092
FGF2_FGFR3	B-cells|DC	1	-0.171368
FGF2_FGFRL1	B-cells|DC	1	-0.171368
TGFB1_TGFBR3	B-cells|DC	1	0.445727
LAMP1_FAM3C	B-cells|DC	1	-0.894322
PDCD1_FAM3C	B-cells|DC	1	-0.358454
ADGRG5_FAM3C	B-cells|DC	1	-0.320126
CXCR3_CXCL9	B-cells|DC	1	0.292782
DPP4_CXCL9	B-cells|DC	1	0.295135
FCGR2A_CXCL9	B-cells|DC	1	0.437228
EGFR_NRG1	B-cells|DC	1	-0.123434
ADGRL1_NRG1	B-cells|DC	1	-0.0439433
ERBB3_NRG1	B-cells|DC	1	-0.120294
EGFR_EGF	B-cells|DC	1	-0.349235
EGFR_TGFB1	B-cells|DC	1	0.391768
EGFR_MIF	B-cells|DC	1	-0.682696
CD74_MIF	B-cells|DC	0.0009	0.899176
EGFR_GRN	B-cells|DC	1	-0.155213
TNFRSF1A_GRN	B-cells|DC	1	-0.293359
TNFRSF1B_GRN	B-cells|DC	1	-0.117161
EGFR_COPA	B-cells|DC	1	-0.388355
CD74_COPA	B-cells|DC	1	1.00432
EGFR_EPGN	B-cells|DC	1	-0.265345
TNFRSF13B_TNFSF13B	B-cells|DC	1	0.187768
TFRC_TNFSF13B	B-cells|DC	1	-0.100051
CD40_TNFSF13B	B-cells|DC	1	0.0662614
CD74_APP	B-cells|DC	0.0009	1.00072
ICAM1_SPN	B-cells|DC	1	0.0129262
ICAM1_ITGAL	B-cells|DC	1	0.015783
TNFRSF1A_FASLG	B-cells|DC	1	-0.397828
TNFRSF10B_FASLG	B-cells|DC	1	-0.104697
ADORA2A_NAMPT	B-cells|DC	1	0.178874
NRP1_VEGFA	B-cells|DC	1	-0.21424
NRP2_VEGFA	B-cells|DC	1	-0.222633
NRP1_PGF	B-cells|DC	1	-0.103147
NRP2_PGF	B-cells|DC	1	-0.112475
FLT1_PGF	B-cells|DC	1	0.00432161
NRP1_VEGFB	B-cells|DC	1	-0.268817
FLT1_VEGFB	B-cells|DC	1	-0.148801
ADRB2_VEGFB	B-cells|DC	1	-0.131313
NRP2_SEMA3F	B-cells|DC	1	-0.236164
GRN_SORT1	B-cells|DC	1	-0.78339
COPA_SORT1	B-cells|DC	1	-0.318326
LGALS9_DAG1	B-cells|DC	1	-0.614845
PLXNB2_SEMA4C	B-cells|DC	1	-0.403542
ICOSLG_ICOS	B-cells|DC	1	-0.0159576
DPP4_CCL11	B-cells|DC	1	-0.129734
CCR2_CCL11	B-cells|DC	1	-0.184425
HLA-DRB1_OGN	B-cells|DC	1	0.835116
NOTCH1_JAG2	B-cells|DC	1	-0.125006
NOTCH1_WNT4	B-cells|DC	1	-0.354759
CCL24_CCR2	B-cells|DC	1	0.738984
CCL2_CCR2	B-cells|DC	1	0.71721
CCL2_ACKR1	B-cells|DC	1	-0.147202
CCL5_ACKR1	B-cells|DC	1	-0.229382
PF4_ACKR1	B-cells|DC	1	-0.161653
CCL8_ACKR1	B-cells|DC	1	-0.176251
CCL7_ACKR1	B-cells|DC	1	-0.134477
CXCL10_DPP4	B-cells|DC	1	0.347099
CXCL2_DPP4	B-cells|DC	1	0.291604
PF4_CXCR3	B-cells|DC	1	-0.086201
CXCL10_CXCR3	B-cells|DC	1	-0.147202
CCL25_CCR9	B-cells|DC	1	0.225275
LGALS9_LRP1	B-cells|DC	1	-0.298673
PDGFB_LRP1	B-cells|DC	1	-0.179515
LGALS9_CD47	B-cells|DC	1	0.292782
SIRPA_CD47	B-cells|DC	1	0.410341
LGALS9_SLC1A5	B-cells|DC	1	-0.272297
LGALS9_COLEC12	B-cells|DC	1	-0.349235
LGALS9_HAVCR2	B-cells|DC	1	0.243669
LGALS9_MRC2	B-cells|DC	1	-0.323733
PDGFB_PDGFRB	B-cells|DC	1	-0.212568
PDGFB_PDGFRA	B-cells|DC	1	-0.244685
WNT2_FZD2	B-cells|DC	1	-0.161653
BMP7_SLAMF1	B-cells|DC	1	-0.153607
PLXNB2_SEMA4D	B-cells|DC	1	-0.147202
CD72_SEMA4D	B-cells|DC	1	0.102994
VEGFA_KDR	B-cells|DC	1	-0.242977
TNFSF14_LTBR	B-cells|DC	1	-0.0892673
TNFSF14_TNFRSF14	B-cells|DC	1	0.051024
MIF_TNFRSF14	B-cells|DC	1	-0.409278
MIF_TNFRSF10D	B-cells|DC	1	-0.687335
CXCR6_CXCL16	B-cells|DC	1	0.404903
CCR2_CCL8	B-cells|DC	1	-0.199255
CCR2_CCL7	B-cells|DC	1	-0.114035
IDE_CCL23	B-cells|DC	1	0.725087
NRG1_LSR	B-cells|DC	1	-0.442222
NRG1_MS4A4A	B-cells|DC	1	-0.209228
PLD2_ARF1	B-cells|DC	1	-0.263612
SEMA4A_PLXND1	B-cells|DC	1	0.0648829
CEACAM1_CEACAM8	B-cells|DC	1	-1.09542
VEGFA_FLT1	B-cells|DC	1	-0.1976
LRP6_CKLF	B-cells|DC	1	-0.0877334
COPA_P2RY6	B-cells|DC	1	-0.0144996
NAMPT_P2RY6	B-cells|DC	1	-0.0740006
C3_C3AR1	B-cells|DC	1	-0.121863
ADORA2A_ENTPD1	B-cells|DC	1	0.172488
ADORA2B_ENTPD1	B-cells|DC	1	0.0100637
IL1B_ADRB2	B-cells|DC	1	-0.289827
TNFSF9_TNFRSF9	B-cells|DC	1	-0.169745
TNFSF9_ADGRG5	B-cells|DC	1	0.0496308
PROS1_AXL	B-cells|DC	1	-0.121863
PROS1_TYRO3	B-cells|DC	1	-0.231075
CSF1R_CSF3	B-cells|DC	1	-0.279284
CSF1R_IL34	B-cells|DC	1	-0.229382
PTPRC_CD22	B-cells|DC	1	0.172488
PTPRC_MRC1	B-cells|DC	1	0.421156
PDGFRB_PDGFD	B-cells|DC	1	-0.195946
CTLA4_CD80	B-cells|DC	1	0.68437
CD28_CD86	B-cells|DC	1	0.789103
CTLA4_CD86	B-cells|DC	1	0.834307
SELP_CD34	B-cells|DC	1	-0.145605
SELP_SELPLG	B-cells|DC	1	0.643394
PDGFRA_PDGFC	B-cells|DC	1	-0.200913
FLT4_PDGFC	B-cells|DC	1	-0.176251
PECAM1_CD38	B-cells|DC	1	-0.00578235
C5AR1_RPS19	B-cells|DC	1	0.1137
AXL_IL15RA	B-cells|DC	1	-0.22095
FLT3_FLT3LG	B-cells|DC	1	0.0200577
LTBR_LTB	B-cells|DC	1	-0.117161
CMKLR1_RARRES2	B-cells|DC	1	-0.210897
CX3CR1_CX3CL1	B-cells|DC	1	-0.347399
LILRA4_BST2	B-cells|DC	1	-0.0424568
TEK_ANGPT4	B-cells|DC	1	-0.106249
CD47_SIRPG	B-cells|DC	1	-0.0380063
ESAM_ESAM	B-cells|DC	1	-0.194295
KLRG2_WNT11	B-cells|Delta-Gamma	1	-0.163268
KLRG2_TNFSF9	B-cells|Delta-Gamma	1	-0.226004
PVR_TNFSF9	B-cells|Delta-Gamma	1	-0.403542
PVR_CD226	B-cells|Delta-Gamma	1	0.0496308
PVR_NECTIN3	B-cells|Delta-Gamma	1	-0.364013
CADM3_NECTIN3	B-cells|Delta-Gamma	1	-0.129734
NECTIN2_NECTIN3	B-cells|Delta-Gamma	1	-0.446148
CADM3_CADM4	B-cells|Delta-Gamma	1	-0.174621
CD226_NECTIN2	B-cells|Delta-Gamma	1	-0.416962
FGF2_FGFR1	B-cells|Delta-Gamma	1	-0.239566
FGF2_FGFR3	B-cells|Delta-Gamma	1	-0.171368
FGF2_FGFRL1	B-cells|Delta-Gamma	1	-0.0969617
TGFB1_TGFBR3	B-cells|Delta-Gamma	1	0.43082
LAMP1_FAM3C	B-cells|Delta-Gamma	1	-1.03209
PDCD1_FAM3C	B-cells|Delta-Gamma	1	-0.454032
ADGRG5_FAM3C	B-cells|Delta-Gamma	1	-0.413115
CXCR3_CXCL9	B-cells|Delta-Gamma	1	0.00144197
DPP4_CXCL9	B-cells|Delta-Gamma	1	0.00432161
FCGR2A_CXCL9	B-cells|Delta-Gamma	1	0.176323
EGFR_NRG1	B-cells|Delta-Gamma	1	-0.316528
ADGRL1_NRG1	B-cells|Delta-Gamma	1	-0.226004
ERBB3_NRG1	B-cells|Delta-Gamma	1	-0.312939
EGFR_EGF	B-cells|Delta-Gamma	1	-0.302226
EGFR_TGFB1	B-cells|Delta-Gamma	1	0.324235
EGFR_MIF	B-cells|Delta-Gamma	1	-0.831358
CD74_MIF	B-cells|Delta-Gamma	0.0009	0.851199
EGFR_GRN	B-cells|Delta-Gamma	1	-0.833927
TNFRSF1A_GRN	B-cells|Delta-Gamma	1	-1.05889
TNFRSF1B_GRN	B-cells|Delta-Gamma	1	-0.773491
EGFR_COPA	B-cells|Delta-Gamma	1	-0.494109
CD74_COPA	B-cells|Delta-Gamma	1	0.964953
EGFR_EPGN	B-cells|Delta-Gamma	1	-0.265345
TNFRSF13B_TNFSF13B	B-cells|Delta-Gamma	1	0.177599
TFRC_TNFSF13B	B-cells|Delta-Gamma	1	-0.112475
CD40_TNFSF13B	B-cells|Delta-Gamma	1	0.0551957
CD74_APP	B-cells|Delta-Gamma	1	0.877352
ICAM1_SPN	B-cells|Delta-Gamma	1	0.206643
ICAM1_ITGAL	B-cells|Delta-Gamma	1	0.408168
TNFRSF1A_FASLG	B-cells|Delta-Gamma	1	-0.312939
TNFRSF10B_FASLG	B-cells|Delta-Gamma	1	-0.0335695
ADORA2A_NAMPT	B-cells|Delta-Gamma	1	-0.093879
NRP1_VEGFA	B-cells|Delta-Gamma	1	-0.375197
NRP2_VEGFA	B-cells|Delta-Gamma	1	-0.384584
NRP1_PGF	B-cells|Delta-Gamma	1	-0.217591
NRP2_PGF	B-cells|Delta-Gamma	1	-0.227692
FLT1_PGF	B-cells|Delta-Gamma	1	-0.101598
NRP1_VEGFB	B-cells|Delta-Gamma	1	-0.189351
FLT1_VEGFB	B-cells|Delta-Gamma	1	-0.07552
ADRB2_VEGFB	B-cells|Delta-Gamma	1	-0.0588937
NRP2_SEMA3F	B-cells|Delta-Gamma	1	-0.265345
GRN_SORT1	B-cells|Delta-Gamma	1	-0.852042
COPA_SORT1	B-cells|Delta-Gamma	1	-0.367732
LGALS9_DAG1	B-cells|Delta-Gamma	1	-0.641604
PLXNB2_SEMA4C	B-cells|Delta-Gamma	1	-0.246395
ICOSLG_ICOS	B-cells|Delta-Gamma	1	1.87617
DPP4_CCL11	B-cells|Delta-Gamma	1	-0.129734
CCR2_CCL11	B-cells|Delta-Gamma	1	-0.184425
HLA-DRB1_OGN	B-cells|Delta-Gamma	1	0.835116
NOTCH1_JAG2	B-cells|Delta-Gamma	1	-0.199255
NOTCH1_WNT4	B-cells|Delta-Gamma	1	-0.440263
CCL24_CCR2	B-cells|Delta-Gamma	1	1.12367
CCL2_CCR2	B-cells|Delta-Gamma	1	1.10635
CCL2_ACKR1	B-cells|Delta-Gamma	1	-0.0740006
CCL5_ACKR1	B-cells|Delta-Gamma	1	-0.153607
PF4_ACKR1	B-cells|Delta-Gamma	1	-0.0877334
CCL8_ACKR1	B-cells|Delta-Gamma	1	-0.101598
CCL7_ACKR1	B-cells|Delta-Gamma	1	-0.0619024
CXCL10_DPP4	B-cells|Delta-Gamma	1	-0.304006
CXCL2_DPP4	B-cells|Delta-Gamma	1	-0.390245
PF4_CXCR3	B-cells|Delta-Gamma	1	-0.0664274
CXCL10_CXCR3	B-cells|Delta-Gamma	1	-0.12658
CCL25_CCR9	B-cells|Delta-Gamma	1	-0.0350469
LGALS9_LRP1	B-cells|Delta-Gamma	1	-0.514573
PDGFB_LRP1	B-cells|Delta-Gamma	1	-0.37707
LGALS9_CD47	B-cells|Delta-Gamma	1	-0.356606
SIRPA_CD47	B-cells|Delta-Gamma	1	-0.176251
LGALS9_SLC1A5	B-cells|Delta-Gamma	1	-0.304006
LGALS9_COLEC12	B-cells|Delta-Gamma	1	-0.392137
LGALS9_HAVCR2	B-cells|Delta-Gamma	1	-0.332789
LGALS9_MRC2	B-cells|Delta-Gamma	1	-0.24127
PDGFB_PDGFRB	B-cells|Delta-Gamma	1	-0.212568
PDGFB_PDGFRA	B-cells|Delta-Gamma	1	-0.244685
WNT2_FZD2	B-cells|Delta-Gamma	1	-0.161653
BMP7_SLAMF1	B-cells|Delta-Gamma	1	-0.0740006
PLXNB2_SEMA4D	B-cells|Delta-Gamma	1	-0.323733
CD72_SEMA4D	B-cells|Delta-Gamma	1	-0.0439433
VEGFA_KDR	B-cells|Delta-Gamma	1	-0.316528
TNFSF14_LTBR	B-cells|Delta-Gamma	1	-0.316528
TNFSF14_TNFRSF14	B-cells|Delta-Gamma	1	0.0662614
MIF_TNFRSF14	B-cells|Delta-Gamma	1	-0.390245
MIF_TNFRSF10D	B-cells|Delta-Gamma	1	-0.562772
CXCR6_CXCL16	B-cells|Delta-Gamma	1	-0.643856
CCR2_CCL8	B-cells|Delta-Gamma	1	-0.205896
CCR2_CCL7	B-cells|Delta-Gamma	1	-0.248108
IDE_CCL23	B-cells|Delta-Gamma	1	-0.304006
NRG1_LSR	B-cells|Delta-Gamma	1	-0.58208
NRG1_MS4A4A	B-cells|Delta-Gamma	1	-0.16004
PLD2_ARF1	B-cells|Delta-Gamma	1	-0.45799
SEMA4A_PLXND1	B-cells|Delta-Gamma	1	-0.0785637
CEACAM1_CEACAM8	B-cells|Delta-Gamma	1	-1.20423
VEGFA_FLT1	B-cells|Delta-Gamma	1	-0.204233
LRP6_CKLF	B-cells|Delta-Gamma	1	-0.0543923
COPA_P2RY6	B-cells|Delta-Gamma	1	-0.279284
NAMPT_P2RY6	B-cells|Delta-Gamma	1	-0.351074
C3_C3AR1	B-cells|Delta-Gamma	1	-0.286304
ADORA2A_ENTPD1	B-cells|Delta-Gamma	1	-0.0232698
ADORA2B_ENTPD1	B-cells|Delta-Gamma	1	-0.210897
IL1B_ADRB2	B-cells|Delta-Gamma	1	-0.174621
TNFSF9_TNFRSF9	B-cells|Delta-Gamma	1	0.505891
TNFSF9_ADGRG5	B-cells|Delta-Gamma	1	0.352759
PROS1_AXL	B-cells|Delta-Gamma	1	-0.296899
PROS1_TYRO3	B-cells|Delta-Gamma	1	-0.231075
CSF1R_CSF3	B-cells|Delta-Gamma	1	-0.293359
CSF1R_IL34	B-cells|Delta-Gamma	1	-0.229382
PTPRC_CD22	B-cells|Delta-Gamma	1	0.157044
PTPRC_MRC1	B-cells|Delta-Gamma	1	0.0867838
PDGFRB_PDGFD	B-cells|Delta-Gamma	1	-0.195946
CTLA4_CD80	B-cells|Delta-Gamma	1	0.0440443
CD28_CD86	B-cells|Delta-Gamma	1	-0.115597
CTLA4_CD86	B-cells|Delta-Gamma	1	-0.0320936
SELP_CD34	B-cells|Delta-Gamma	1	-0.244685
SELP_SELPLG	B-cells|Delta-Gamma	1	1.14143
PDGFRA_PDGFC	B-cells|Delta-Gamma	1	-0.200913
FLT4_PDGFC	B-cells|Delta-Gamma	1	-0.176251
PECAM1_CD38	B-cells|Delta-Gamma	1	-0.139236
C5AR1_RPS19	B-cells|Delta-Gamma	1	0.0662614
AXL_IL15RA	B-cells|Delta-Gamma	1	-0.314733
FLT3_FLT3LG	B-cells|Delta-Gamma	1	0.0524159
LTBR_LTB	B-cells|Delta-Gamma	1	0.820485
CMKLR1_RARRES2	B-cells|Delta-Gamma	1	-0.222633
CX3CR1_CX3CL1	B-cells|Delta-Gamma	1	-0.334607
LILRA4_BST2	B-cells|Delta-Gamma	1	-0.671164
TEK_ANGPT4	B-cells|Delta-Gamma	1	-0.106249
CD47_SIRPG	B-cells|Delta-Gamma	1	-0.184425
ESAM_ESAM	B-cells|Delta-Gamma	1	-0.194295
KLRG2_WNT11	B-cells|Differentiated	1	-0.158429
KLRG2_TNFSF9	B-cells|Differentiated	1	-0.200913
PVR_TNFSF9	B-cells|Differentiated	1	-0.375197
PVR_CD226	B-cells|Differentiated	1	-0.316528
PVR_NECTIN3	B-cells|Differentiated	1	-0.281036
CADM3_NECTIN3	B-cells|Differentiated	1	-0.0588937
NECTIN2_NECTIN3	B-cells|Differentiated	1	-0.358454
CADM3_CADM4	B-cells|Differentiated	1	0.0468403
CD226_NECTIN2	B-cells|Differentiated	1	0.0200577
FGF2_FGFR1	B-cells|Differentiated	1	-0.246395
FGF2_FGFR3	B-cells|Differentiated	1	-0.16004
FGF2_FGFRL1	B-cells|Differentiated	1	-0.0365259
TGFB1_TGFBR3	B-cells|Differentiated	1	0.508936
LAMP1_FAM3C	B-cells|Differentiated	1	-0.403542
PDCD1_FAM3C	B-cells|Differentiated	1	-0.00288828
ADGRG5_FAM3C	B-cells|Differentiated	1	0.0257376
CXCR3_CXCL9	B-cells|Differentiated	1	-0.0985055
DPP4_CXCL9	B-cells|Differentiated	1	-0.093879
FCGR2A_CXCL9	B-cells|Differentiated	1	0.0881416
EGFR_NRG1	B-cells|Differentiated	1	-0.289827
ADGRL1_NRG1	B-cells|Differentiated	1	-0.200913
ERBB3_NRG1	B-cells|Differentiated	1	-0.286304
EGFR_EGF	B-cells|Differentiated	1	0.427606
EGFR_TGFB1	B-cells|Differentiated	1	-0.512514
EGFR_MIF	B-cells|Differentiated	1	-0.00144342
CD74_MIF	B-cells|Differentiated	0.0009	1.16479
EGFR_GRN	B-cells|Differentiated	1	-0.0694519
TNFRSF1A_GRN	B-cells|Differentiated	1	-0.199255
TNFRSF1B_GRN	B-cells|Differentiated	1	-0.0335695
EGFR_COPA	B-cells|Differentiated	1	-0.0306192
CD74_COPA	B-cells|Differentiated	0.0009	1.15121
EGFR_EPGN	B-cells|Differentiated	1	-0.265345
TNFRSF13B_TNFSF13B	B-cells|Differentiated	1	0.182692
TFRC_TNFSF13B	B-cells|Differentiated	1	-0.106249
CD40_TNFSF13B	B-cells|Differentiated	1	0.0593553
CD74_APP	B-cells|Differentiated	0.0009	0.9855
ICAM1_SPN	B-cells|Differentiated	1	-0.168123
ICAM1_ITGAL	B-cells|Differentiated	1	-0.179515
TNFRSF1A_FASLG	B-cells|Differentiated	1	-0.390245
TNFRSF10B_FASLG	B-cells|Differentiated	1	-0.0985055
ADORA2A_NAMPT	B-cells|Differentiated	1	0.111031
NRP1_VEGFA	B-cells|Differentiated	1	-0.195946
NRP2_VEGFA	B-cells|Differentiated	1	-0.204233
NRP1_PGF	B-cells|Differentiated	1	-0.215915
NRP2_PGF	B-cells|Differentiated	1	-0.226004
FLT1_PGF	B-cells|Differentiated	1	-0.100051
NRP1_VEGFB	B-cells|Differentiated	1	-0.131313
FLT1_VEGFB	B-cells|Differentiated	1	-0.0218044
ADRB2_VEGFB	B-cells|Differentiated	1	-0.00578235
NRP2_SEMA3F	B-cells|Differentiated	1	-0.168123
GRN_SORT1	B-cells|Differentiated	1	-0.212568
COPA_SORT1	B-cells|Differentiated	0.18	0.116365
LGALS9_DAG1	B-cells|Differentiated	1	-0.258425
PLXNB2_SEMA4C	B-cells|Differentiated	1	-0.369595
ICOSLG_ICOS	B-cells|Differentiated	1	-0.027675
DPP4_CCL11	B-cells|Differentiated	1	-0.128156
CCR2_CCL11	B-cells|Differentiated	1	-0.184425
HLA-DRB1_OGN	B-cells|Differentiated	1	0.835924
NOTCH1_JAG2	B-cells|Differentiated	1	-0.263612
NOTCH1_WNT4	B-cells|Differentiated	1	-0.309359
CCL24_CCR2	B-cells|Differentiated	1	-0.14401
CCL2_CCR2	B-cells|Differentiated	1	-0.186065
CCL2_ACKR1	B-cells|Differentiated	1	-0.147202
CCL5_ACKR1	B-cells|Differentiated	1	-0.229382
PF4_ACKR1	B-cells|Differentiated	1	-0.161653
CCL8_ACKR1	B-cells|Differentiated	1	-0.176251
CCL7_ACKR1	B-cells|Differentiated	1	-0.134477
CXCL10_DPP4	B-cells|Differentiated	1	0.167358
CXCL2_DPP4	B-cells|Differentiated	1	0.105678
PF4_CXCR3	B-cells|Differentiated	1	-0.137648
CXCL10_CXCR3	B-cells|Differentiated	1	-0.200913
CCL25_CCR9	B-cells|Differentiated	1	-0.0664274
LGALS9_LRP1	B-cells|Differentiated	1	-0.50226
PDGFB_LRP1	B-cells|Differentiated	1	-0.365871
LGALS9_CD47	B-cells|Differentiated	1	-0.428566
SIRPA_CD47	B-cells|Differentiated	1	-0.239566
LGALS9_SLC1A5	B-cells|Differentiated	1	-0.0877334
LGALS9_COLEC12	B-cells|Differentiated	1	-0.356606
LGALS9_HAVCR2	B-cells|Differentiated	1	-0.330973
LGALS9_MRC2	B-cells|Differentiated	1	-0.321928
PDGFB_PDGFRB	B-cells|Differentiated	1	-0.212568
PDGFB_PDGFRA	B-cells|Differentiated	1	-0.24127
WNT2_FZD2	B-cells|Differentiated	1	-0.142417
BMP7_SLAMF1	B-cells|Differentiated	1	-0.171368
PLXNB2_SEMA4D	B-cells|Differentiated	1	-0.436354
CD72_SEMA4D	B-cells|Differentiated	1	-0.136062
VEGFA_KDR	B-cells|Differentiated	1	-0.309359
TNFSF14_LTBR	B-cells|Differentiated	1	-0.0335695
TNFSF14_TNFRSF14	B-cells|Differentiated	1	-0.0816138
MIF_TNFRSF14	B-cells|Differentiated	1	-0.597278
MIF_TNFRSF10D	B-cells|Differentiated	1	-0.646112
CXCR6_CXCL16	B-cells|Differentiated	1	-0.24127
CCR2_CCL8	B-cells|Differentiated	1	-0.199255
CCR2_CCL7	B-cells|Differentiated	1	-0.236164
IDE_CCL23	B-cells|Differentiated	1	-0.300448
NRG1_LSR	B-cells|Differentiated	1	0.041243
NRG1_MS4A4A	B-cells|Differentiated	1	-0.215915
PLD2_ARF1	B-cells|Differentiated	1	0.119024
SEMA4A_PLXND1	B-cells|Differentiated	1	-0.358454
CEACAM1_CEACAM8	B-cells|Differentiated	1	-0.0816138
VEGFA_FLT1	B-cells|Differentiated	1	-0.330973
LRP6_CKLF	B-cells|Differentiated	1	-0.207561
COPA_P2RY6	B-cells|Differentiated	1	-0.268817
NAMPT_P2RY6	B-cells|Differentiated	1	-0.340075
C3_C3AR1	B-cells|Differentiated	1	-0.320126
ADORA2A_ENTPD1	B-cells|Differentiated	1	-0.018878
ADORA2B_ENTPD1	B-cells|Differentiated	1	-0.205896
IL1B_ADRB2	B-cells|Differentiated	1	-0.316528
TNFSF9_TNFRSF9	B-cells|Differentiated	1	-0.195946
TNFSF9_ADGRG5	B-cells|Differentiated	1	-0.14401
PROS1_AXL	B-cells|Differentiated	1	-0.32916
PROS1_TYRO3	B-cells|Differentiated	1	0.129613
CSF1R_CSF3	B-cells|Differentiated	1	-0.288065
CSF1R_IL34	B-cells|Differentiated	1	-0.21424
PTPRC_CD22	B-cells|Differentiated	1	0.166073
PTPRC_MRC1	B-cells|Differentiated	1	0.128293
PDGFRB_PDGFD	B-cells|Differentiated	1	0.0214797
CTLA4_CD80	B-cells|Differentiated	1	0.0538064
CD28_CD86	B-cells|Differentiated	1	-0.0954196
CTLA4_CD86	B-cells|Differentiated	1	-0.011588
SELP_CD34	B-cells|Differentiated	1	-0.212568
SELP_SELPLG	B-cells|Differentiated	1	-0.244685
PDGFRA_PDGFC	B-cells|Differentiated	1	-0.110916
FLT4_PDGFC	B-cells|Differentiated	1	-0.0877334
PECAM1_CD38	B-cells|Differentiated	1	-0.242977
C5AR1_RPS19	B-cells|Differentiated	1	-0.384584
AXL_IL15RA	B-cells|Differentiated	1	-0.166503
FLT3_FLT3LG	B-cells|Differentiated	1	-0.0394883
LTBR_LTB	B-cells|Differentiated	1	-0.426625
CMKLR1_RARRES2	B-cells|Differentiated	1	-0.217591
CX3CR1_CX3CL1	B-cells|Differentiated	1	-0.013043
LILRA4_BST2	B-cells|Differentiated	1	-0.242977
TEK_ANGPT4	B-cells|Differentiated	1	-0.106249
CD47_SIRPG	B-cells|Differentiated	1	-0.184425
ESAM_ESAM	B-cells|Differentiated	1	-0.182786
KLRG2_WNT11	B-cells|Endothelial	1	-0.101598
KLRG2_TNFSF9	B-cells|Endothelial	1	0.233888
PVR_TNFSF9	B-cells|Endothelial	1	0.107018
PVR_CD226	B-cells|Endothelial	1	-0.318326
PVR_NECTIN3	B-cells|Endothelial	1	-0.236164
CADM3_NECTIN3	B-cells|Endothelial	1	-0.0218044
NECTIN2_NECTIN3	B-cells|Endothelial	1	-0.311148
CADM3_CADM4	B-cells|Endothelial	1	-0.0800879
CD226_NECTIN2	B-cells|Endothelial	1	-0.0247367
FGF2_FGFR1	B-cells|Endothelial	1	0.260628
FGF2_FGFR3	B-cells|Endothelial	1	-0.120294
FGF2_FGFRL1	B-cells|Endothelial	1	-0.12658
TGFB1_TGFBR3	B-cells|Endothelial	1	0.506907
LAMP1_FAM3C	B-cells|Endothelial	1	-0.610433
PDCD1_FAM3C	B-cells|Endothelial	1	-0.15682
ADGRG5_FAM3C	B-cells|Endothelial	1	-0.123434
CXCR3_CXCL9	B-cells|Endothelial	1	-0.0785637
DPP4_CXCL9	B-cells|Endothelial	1	-0.07552
FCGR2A_CXCL9	B-cells|Endothelial	1	0.105678
EGFR_NRG1	B-cells|Endothelial	1	-0.289827
ADGRL1_NRG1	B-cells|Endothelial	1	-0.200913
ERBB3_NRG1	B-cells|Endothelial	1	-0.286304
EGFR_EGF	B-cells|Endothelial	1	-0.332789
EGFR_TGFB1	B-cells|Endothelial	1	-0.2567
EGFR_MIF	B-cells|Endothelial	1	-0.438307
CD74_MIF	B-cells|Endothelial	0.0009	0.986229
EGFR_GRN	B-cells|Endothelial	1	-0.452057
TNFRSF1A_GRN	B-cells|Endothelial	1	-0.62371
TNFRSF1B_GRN	B-cells|Endothelial	1	-0.405451
EGFR_COPA	B-cells|Endothelial	1	-0.227692
CD74_COPA	B-cells|Endothelial	0.0009	1.06764
EGFR_EPGN	B-cells|Endothelial	1	-0.265345
TNFRSF13B_TNFSF13B	B-cells|Endothelial	1	0.249749
TFRC_TNFSF13B	B-cells|Endothelial	1	-0.0247367
CD40_TNFSF13B	B-cells|Endothelial	1	0.132248
CD74_APP	B-cells|Endothelial	0.0009	1.16543
ICAM1_SPN	B-cells|Endothelial	1	-0.190997
ICAM1_ITGAL	B-cells|Endothelial	1	-0.187707
TNFRSF1A_FASLG	B-cells|Endothelial	1	-0.33825
TNFRSF10B_FASLG	B-cells|Endothelial	1	-0.0558912
ADORA2A_NAMPT	B-cells|Endothelial	1	0.137504
NRP1_VEGFA	B-cells|Endothelial	1	-0.205896
NRP2_VEGFA	B-cells|Endothelial	1	-0.215915
NRP1_PGF	B-cells|Endothelial	1	0.367371
NRP2_PGF	B-cells|Endothelial	1	0.361768
FLT1_PGF	B-cells|Endothelial	1	0.445727
NRP1_VEGFB	B-cells|Endothelial	1	-0.125006
FLT1_VEGFB	B-cells|Endothelial	1	-0.0159576
ADRB2_VEGFB	B-cells|Endothelial	1	0
NRP2_SEMA3F	B-cells|Endothelial	1	-0.0969617
GRN_SORT1	B-cells|Endothelial	1	-0.246395
COPA_SORT1	B-cells|Endothelial	0.476	0.0894982
LGALS9_DAG1	B-cells|Endothelial	1	-0.12658
PLXNB2_SEMA4C	B-cells|Endothelial	1	0.496718
ICOSLG_ICOS	B-cells|Endothelial	1	-0.0409718
DPP4_CCL11	B-cells|Endothelial	1	1.21101
CCR2_CCL11	B-cells|Endothelial	1	1.18903
HLA-DRB1_OGN	B-cells|Endothelial	1	0.866315
NOTCH1_JAG2	B-cells|Endothelial	1	-0.239566
NOTCH1_WNT4	B-cells|Endothelial	1	-0.411195
CCL24_CCR2	B-cells|Endothelial	1	-0.164884
CCL2_CCR2	B-cells|Endothelial	1	-0.205896
CCL2_ACKR1	B-cells|Endothelial	1	-0.0816138
CCL5_ACKR1	B-cells|Endothelial	1	-0.161653
PF4_ACKR1	B-cells|Endothelial	1	-0.0954196
CCL8_ACKR1	B-cells|Endothelial	1	-0.109359
CCL7_ACKR1	B-cells|Endothelial	1	-0.0694519
CXCL10_DPP4	B-cells|Endothelial	1	-0.304006
CXCL2_DPP4	B-cells|Endothelial	1	-0.390245
PF4_CXCR3	B-cells|Endothelial	1	-0.137648
CXCL10_CXCR3	B-cells|Endothelial	1	-0.200913
CCL25_CCR9	B-cells|Endothelial	1	0.0186342
LGALS9_LRP1	B-cells|Endothelial	1	-0.0892673
PDGFB_LRP1	B-cells|Endothelial	1	0.0143553
LGALS9_CD47	B-cells|Endothelial	1	-0.424688
SIRPA_CD47	B-cells|Endothelial	1	-0.236164
LGALS9_SLC1A5	B-cells|Endothelial	1	-0.0588937
LGALS9_COLEC12	B-cells|Endothelial	1	-0.0306192
LGALS9_HAVCR2	B-cells|Endothelial	1	-0.332789
LGALS9_MRC2	B-cells|Endothelial	1	-0.323733
PDGFB_PDGFRB	B-cells|Endothelial	1	1.52206
PDGFB_PDGFRA	B-cells|Endothelial	1	-0.244685
WNT2_FZD2	B-cells|Endothelial	1	-0.0603973
BMP7_SLAMF1	B-cells|Endothelial	1	-0.182786
PLXNB2_SEMA4D	B-cells|Endothelial	1	-0.526992
CD72_SEMA4D	B-cells|Endothelial	1	-0.209228
VEGFA_KDR	B-cells|Endothelial	1	-0.316528
TNFSF14_LTBR	B-cells|Endothelial	1	-0.234465
TNFSF14_TNFRSF14	B-cells|Endothelial	1	-0.0619024
MIF_TNFRSF14	B-cells|Endothelial	1	-0.567041
MIF_TNFRSF10D	B-cells|Endothelial	1	-0.673463
CXCR6_CXCL16	B-cells|Endothelial	1	-0.50226
CCR2_CCL8	B-cells|Endothelial	1	-0.205896
CCR2_CCL7	B-cells|Endothelial	1	0.0496308
IDE_CCL23	B-cells|Endothelial	1	-0.296899
NRG1_LSR	B-cells|Endothelial	1	-0.634867
NRG1_MS4A4A	B-cells|Endothelial	1	-0.226004
PLD2_ARF1	B-cells|Endothelial	1	-0.194295
SEMA4A_PLXND1	B-cells|Endothelial	1	-0.136062
CEACAM1_CEACAM8	B-cells|Endothelial	1	-1.06492
VEGFA_FLT1	B-cells|Endothelial	1	0.280956
LRP6_CKLF	B-cells|Endothelial	1	-0.117161
COPA_P2RY6	B-cells|Endothelial	1	-0.234465
NAMPT_P2RY6	B-cells|Endothelial	1	-0.305788
C3_C3AR1	B-cells|Endothelial	1	-0.295128
ADORA2A_ENTPD1	B-cells|Endothelial	1	0.0935602
ADORA2B_ENTPD1	B-cells|Endothelial	1	-0.0785637
IL1B_ADRB2	B-cells|Endothelial	1	-0.33825
TNFSF9_TNFRSF9	B-cells|Endothelial	1	-0.142417
TNFSF9_ADGRG5	B-cells|Endothelial	1	-0.14401
PROS1_AXL	B-cells|Endothelial	1	0.265437
PROS1_TYRO3	B-cells|Endothelial	1	-0.231075
CSF1R_CSF3	B-cells|Endothelial	1	-0.293359
CSF1R_IL34	B-cells|Endothelial	1	0.506907
PTPRC_CD22	B-cells|Endothelial	1	0.49057
PTPRC_MRC1	B-cells|Endothelial	1	0.0867838
PDGFRB_PDGFD	B-cells|Endothelial	1	-0.0232698
CTLA4_CD80	B-cells|Endothelial	1	0.109695
CD28_CD86	B-cells|Endothelial	1	-0.086201
CTLA4_CD86	B-cells|Endothelial	1	-0.00433459
SELP_CD34	B-cells|Endothelial	1	-0.161653
SELP_SELPLG	B-cells|Endothelial	1	-0.237864
PDGFRA_PDGFC	B-cells|Endothelial	1	-0.200913
FLT4_PDGFC	B-cells|Endothelial	1	-0.176251
PECAM1_CD38	B-cells|Endothelial	1	-0.239566
C5AR1_RPS19	B-cells|Endothelial	1	-0.286304
AXL_IL15RA	B-cells|Endothelial	1	-0.0306192
FLT3_FLT3LG	B-cells|Endothelial	1	0.0071955
LTBR_LTB	B-cells|Endothelial	1	-0.444184
CMKLR1_RARRES2	B-cells|Endothelial	1	0.903038
CX3CR1_CX3CL1	B-cells|Endothelial	1	-0.375197
LILRA4_BST2	B-cells|Endothelial	1	-0.274041
TEK_ANGPT4	B-cells|Endothelial	1	0.0621217
CD47_SIRPG	B-cells|Endothelial	1	-0.184425
ESAM_ESAM	B-cells|Endothelial	1	0.9855
KLRG2_WNT11	B-cells|Fibroblasts	1	0.0299829
KLRG2_TNFSF9	B-cells|Fibroblasts	1	0.304511
PVR_TNFSF9	B-cells|Fibroblasts	1	0.183963
PVR_CD226	B-cells|Fibroblasts	1	-0.300448
PVR_NECTIN3	B-cells|Fibroblasts	1	-0.00578235
CADM3_NECTIN3	B-cells|Fibroblasts	1	0.178874
NECTIN2_NECTIN3	B-cells|Fibroblasts	1	-0.0694519
CADM3_CADM4	B-cells|Fibroblasts	1	-0.0619024
CD226_NECTIN2	B-cells|Fibroblasts	1	-0.150401
FGF2_FGFR1	B-cells|Fibroblasts	1	0.681674
FGF2_FGFR3	B-cells|Fibroblasts	1	-0.12658
FGF2_FGFRL1	B-cells|Fibroblasts	1	-0.0528949
TGFB1_TGFBR3	B-cells|Fibroblasts	0.0009	0.856787
LAMP1_FAM3C	B-cells|Fibroblasts	1	-0.62371
PDCD1_FAM3C	B-cells|Fibroblasts	1	-0.166503
ADGRG5_FAM3C	B-cells|Fibroblasts	1	-0.132894
CXCR3_CXCL9	B-cells|Fibroblasts	1	0.248535
DPP4_CXCL9	B-cells|Fibroblasts	1	0.252173
FCGR2A_CXCL9	B-cells|Fibroblasts	1	0.397255
EGFR_NRG1	B-cells|Fibroblasts	1	-0.184425
ADGRL1_NRG1	B-cells|Fibroblasts	1	-0.101598
ERBB3_NRG1	B-cells|Fibroblasts	1	-0.181149
EGFR_EGF	B-cells|Fibroblasts	1	-0.384584
EGFR_TGFB1	B-cells|Fibroblasts	1	-0.209228
EGFR_MIF	B-cells|Fibroblasts	1	-0.854649
CD74_MIF	B-cells|Fibroblasts	0.0009	0.843984
EGFR_GRN	B-cells|Fibroblasts	1	-0.291592
TNFRSF1A_GRN	B-cells|Fibroblasts	1	-0.444184
TNFRSF1B_GRN	B-cells|Fibroblasts	1	-0.249822
EGFR_COPA	B-cells|Fibroblasts	1	-0.155213
CD74_COPA	B-cells|Fibroblasts	0.0009	1.09761
EGFR_EPGN	B-cells|Fibroblasts	1	-0.248108
TNFRSF13B_TNFSF13B	B-cells|Fibroblasts	1	0.391768
TFRC_TNFSF13B	B-cells|Fibroblasts	1	0.145351
CD40_TNFSF13B	B-cells|Fibroblasts	1	0.285698
CD74_APP	B-cells|Fibroblasts	0.0009	1.26063
ICAM1_SPN	B-cells|Fibroblasts	1	-0.182786
ICAM1_ITGAL	B-cells|Fibroblasts	1	-0.164884
TNFRSF1A_FASLG	B-cells|Fibroblasts	1	-0.373327
TNFRSF10B_FASLG	B-cells|Fibroblasts	1	-0.0831412
ADORA2A_NAMPT	B-cells|Fibroblasts	1	0.0758749
NRP1_VEGFA	B-cells|Fibroblasts	1	-0.00144342
NRP2_VEGFA	B-cells|Fibroblasts	1	-0.00868224
NRP1_PGF	B-cells|Fibroblasts	1	0.0662614
NRP2_PGF	B-cells|Fibroblasts	1	0.0579701
FLT1_PGF	B-cells|Fibroblasts	1	0.16221
NRP1_VEGFB	B-cells|Fibroblasts	1	-0.0144996
FLT1_VEGFB	B-cells|Fibroblasts	1	0.0867838
ADRB2_VEGFB	B-cells|Fibroblasts	1	0.10165
NRP2_SEMA3F	B-cells|Fibroblasts	1	-0.246395
GRN_SORT1	B-cells|Fibroblasts	1	-0.75877
COPA_SORT1	B-cells|Fibroblasts	1	-0.300448
LGALS9_DAG1	B-cells|Fibroblasts	1	-0.077041
PLXNB2_SEMA4C	B-cells|Fibroblasts	1	-0.14401
ICOSLG_ICOS	B-cells|Fibroblasts	1	-0.0159576
DPP4_CCL11	B-cells|Fibroblasts	1	0.6107
CCR2_CCL11	B-cells|Fibroblasts	1	0.577248
HLA-DRB1_OGN	B-cells|Fibroblasts	0.0009	1.49006
NOTCH1_JAG2	B-cells|Fibroblasts	1	-0.2567
NOTCH1_WNT4	B-cells|Fibroblasts	1	-0.345564
CCL24_CCR2	B-cells|Fibroblasts	1	-0.147202
CCL2_CCR2	B-cells|Fibroblasts	1	-0.189351
CCL2_ACKR1	B-cells|Fibroblasts	1	0.041243
CCL5_ACKR1	B-cells|Fibroblasts	1	-0.0306192
PF4_ACKR1	B-cells|Fibroblasts	1	0.0299829
CCL8_ACKR1	B-cells|Fibroblasts	1	0.015783
CCL7_ACKR1	B-cells|Fibroblasts	1	0.0538064
CXCL10_DPP4	B-cells|Fibroblasts	1	0.0579701
CXCL2_DPP4	B-cells|Fibroblasts	1	-0.0101344
PF4_CXCR3	B-cells|Fibroblasts	1	-0.131313
CXCL10_CXCR3	B-cells|Fibroblasts	1	-0.192645
CCL25_CCR9	B-cells|Fibroblasts	1	-0.0619024
LGALS9_LRP1	B-cells|Fibroblasts	1	0.824564
PDGFB_LRP1	B-cells|Fibroblasts	1	0.88049
LGALS9_CD47	B-cells|Fibroblasts	1	0.0398403
SIRPA_CD47	B-cells|Fibroblasts	1	0.178874
LGALS9_SLC1A5	B-cells|Fibroblasts	1	-0.12658
LGALS9_COLEC12	B-cells|Fibroblasts	1	0.593593
LGALS9_HAVCR2	B-cells|Fibroblasts	1	-0.332789
LGALS9_MRC2	B-cells|Fibroblasts	1	0.488515
PDGFB_PDGFRB	B-cells|Fibroblasts	1	0.335712
PDGFB_PDGFRA	B-cells|Fibroblasts	1	0.85997
WNT2_FZD2	B-cells|Fibroblasts	1	0.297485
BMP7_SLAMF1	B-cells|Fibroblasts	1	-0.172994
PLXNB2_SEMA4D	B-cells|Fibroblasts	1	-0.483985
CD72_SEMA4D	B-cells|Fibroblasts	1	-0.174621
VEGFA_KDR	B-cells|Fibroblasts	1	-0.21927
TNFSF14_LTBR	B-cells|Fibroblasts	1	-0.00578235
TNFSF14_TNFRSF14	B-cells|Fibroblasts	1	-0.0664274
MIF_TNFRSF14	B-cells|Fibroblasts	1	-0.573467
MIF_TNFRSF10D	B-cells|Fibroblasts	1	-0.579922
CXCR6_CXCL16	B-cells|Fibroblasts	1	-0.407364
CCR2_CCL8	B-cells|Fibroblasts	1	-0.189351
CCR2_CCL7	B-cells|Fibroblasts	1	0.496718
IDE_CCL23	B-cells|Fibroblasts	1	-0.263612
NRG1_LSR	B-cells|Fibroblasts	1	-0.610433
NRG1_MS4A4A	B-cells|Fibroblasts	1	-0.202572
PLD2_ARF1	B-cells|Fibroblasts	1	-0.426625
SEMA4A_PLXND1	B-cells|Fibroblasts	1	-0.302226
CEACAM1_CEACAM8	B-cells|Fibroblasts	1	-1.1047
VEGFA_FLT1	B-cells|Fibroblasts	1	-0.309359
LRP6_CKLF	B-cells|Fibroblasts	1	-0.205896
COPA_P2RY6	B-cells|Fibroblasts	1	-0.232769
NAMPT_P2RY6	B-cells|Fibroblasts	1	-0.302226
C3_C3AR1	B-cells|Fibroblasts	1	-0.288065
ADORA2A_ENTPD1	B-cells|Fibroblasts	1	0.0313952
ADORA2B_ENTPD1	B-cells|Fibroblasts	1	-0.148801
IL1B_ADRB2	B-cells|Fibroblasts	1	-0.341903
TNFSF9_TNFRSF9	B-cells|Fibroblasts	1	-0.190997
TNFSF9_ADGRG5	B-cells|Fibroblasts	1	-0.14401
PROS1_AXL	B-cells|Fibroblasts	1	0.528071
PROS1_TYRO3	B-cells|Fibroblasts	1	-0.217591
CSF1R_CSF3	B-cells|Fibroblasts	1	-0.28279
CSF1R_IL34	B-cells|Fibroblasts	1	0.191563
PTPRC_CD22	B-cells|Fibroblasts	1	0.186501
PTPRC_MRC1	B-cells|Fibroblasts	1	0.0962619
PDGFRB_PDGFD	B-cells|Fibroblasts	1	0.195348
CTLA4_CD80	B-cells|Fibroblasts	1	0.211635
CD28_CD86	B-cells|Fibroblasts	1	-0.0831412
CTLA4_CD86	B-cells|Fibroblasts	1	0
SELP_CD34	B-cells|Fibroblasts	1	0.697774
SELP_SELPLG	B-cells|Fibroblasts	1	-0.229382
PDGFRA_PDGFC	B-cells|Fibroblasts	1	0.0867838
FLT4_PDGFC	B-cells|Fibroblasts	1	0.107018
PECAM1_CD38	B-cells|Fibroblasts	1	-0.212568
C5AR1_RPS19	B-cells|Fibroblasts	1	0.0482362
AXL_IL15RA	B-cells|Fibroblasts	1	0.0648829
FLT3_FLT3LG	B-cells|Fibroblasts	1	0.117695
LTBR_LTB	B-cells|Fibroblasts	1	-0.430509
CMKLR1_RARRES2	B-cells|Fibroblasts	1	1.05102
CX3CR1_CX3CL1	B-cells|Fibroblasts	1	-0.106249
LILRA4_BST2	B-cells|Fibroblasts	1	-0.12658
TEK_ANGPT4	B-cells|Fibroblasts	1	0.334568
CD47_SIRPG	B-cells|Fibroblasts	1	-0.177882
ESAM_ESAM	B-cells|Fibroblasts	1	-0.177882
KLRG2_WNT11	B-cells|M2	1	-0.163268
KLRG2_TNFSF9	B-cells|M2	1	0.181421
PVR_TNFSF9	B-cells|M2	1	0.0496308
PVR_CD226	B-cells|M2	1	-0.0846703
PVR_NECTIN3	B-cells|M2	1	-0.340075
CADM3_NECTIN3	B-cells|M2	1	-0.109359
NECTIN2_NECTIN3	B-cells|M2	1	-0.42082
CADM3_CADM4	B-cells|M2	1	-0.174621
CD226_NECTIN2	B-cells|M2	1	-0.291592
FGF2_FGFR1	B-cells|M2	1	0.0881416
FGF2_FGFR3	B-cells|M2	1	-0.171368
FGF2_FGFRL1	B-cells|M2	1	-0.171368
TGFB1_TGFBR3	B-cells|M2	1	0.43082
LAMP1_FAM3C	B-cells|M2	1	-0.625934
PDCD1_FAM3C	B-cells|M2	1	-0.169745
ADGRG5_FAM3C	B-cells|M2	1	-0.136062
CXCR3_CXCL9	B-cells|M2	1	-0.00433459
DPP4_CXCL9	B-cells|M2	1	0
FCGR2A_CXCL9	B-cells|M2	1	0.171207
EGFR_NRG1	B-cells|M2	1	-0.260152
ADGRL1_NRG1	B-cells|M2	1	-0.172994
ERBB3_NRG1	B-cells|M2	1	-0.2567
EGFR_EGF	B-cells|M2	1	-0.345564
EGFR_TGFB1	B-cells|M2	1	0.405992
EGFR_MIF	B-cells|M2	1	-0.91866
CD74_MIF	B-cells|M2	0.0009	0.824564
EGFR_GRN	B-cells|M2	1	0.885965
TNFRSF1A_GRN	B-cells|M2	1	0.821302
TNFRSF1B_GRN	B-cells|M2	1	0.90458
EGFR_COPA	B-cells|M2	1	-0.307573
CD74_COPA	B-cells|M2	0.0009	1.03562
EGFR_EPGN	B-cells|M2	1	-0.265345
TNFRSF13B_TNFSF13B	B-cells|M2	1	0.331132
TFRC_TNFSF13B	B-cells|M2	1	0.0731347
CD40_TNFSF13B	B-cells|M2	1	0.22033
CD74_APP	B-cells|M2	0.0009	1.15445
ICAM1_SPN	B-cells|M2	1	-0.161653
ICAM1_ITGAL	B-cells|M2	1	-0.129734
TNFRSF1A_FASLG	B-cells|M2	1	-0.397828
TNFRSF10B_FASLG	B-cells|M2	1	-0.104697
ADORA2A_NAMPT	B-cells|M2	1	0.282143
NRP1_VEGFA	B-cells|M2	1	-0.321928
NRP2_VEGFA	B-cells|M2	1	-0.332789
NRP1_PGF	B-cells|M2	1	-0.217591
NRP2_PGF	B-cells|M2	1	-0.227692
FLT1_PGF	B-cells|M2	1	-0.101598
NRP1_VEGFB	B-cells|M2	1	-0.0785637
FLT1_VEGFB	B-cells|M2	1	0.0271541
ADRB2_VEGFB	B-cells|M2	1	0.0426443
NRP2_SEMA3F	B-cells|M2	1	-0.229382
GRN_SORT1	B-cells|M2	1	-0.77596
COPA_SORT1	B-cells|M2	1	-0.312939
LGALS9_DAG1	B-cells|M2	1	-0.486004
PLXNB2_SEMA4C	B-cells|M2	1	-0.375197
ICOSLG_ICOS	B-cells|M2	1	-0.0174171
DPP4_CCL11	B-cells|M2	1	-0.123434
CCR2_CCL11	B-cells|M2	1	-0.177882
HLA-DRB1_OGN	B-cells|M2	1	0.844787
NOTCH1_JAG2	B-cells|M2	1	-0.202572
NOTCH1_WNT4	B-cells|M2	1	-0.369595
CCL24_CCR2	B-cells|M2	1	0.598365
CCL2_CCR2	B-cells|M2	1	0.573375
CCL2_ACKR1	B-cells|M2	1	-0.147202
CCL5_ACKR1	B-cells|M2	1	-0.229382
PF4_ACKR1	B-cells|M2	1	-0.161653
CCL8_ACKR1	B-cells|M2	1	-0.176251
CCL7_ACKR1	B-cells|M2	1	-0.134477
CXCL10_DPP4	B-cells|M2	1	-0.28279
CXCL2_DPP4	B-cells|M2	1	-0.367732
PF4_CXCR3	B-cells|M2	1	-0.0394883
CXCL10_CXCR3	B-cells|M2	1	-0.0985055
CCL25_CCR9	B-cells|M2	1	-0.0159576
LGALS9_LRP1	B-cells|M2	1	-0.136062
PDGFB_LRP1	B-cells|M2	1	-0.0291463
LGALS9_CD47	B-cells|M2	1	0.077243
SIRPA_CD47	B-cells|M2	1	0.212881
LGALS9_SLC1A5	B-cells|M2	1	-0.550043
LGALS9_COLEC12	B-cells|M2	1	-0.289827
LGALS9_HAVCR2	B-cells|M2	1	-0.249822
LGALS9_MRC2	B-cells|M2	1	-0.323733
PDGFB_PDGFRB	B-cells|M2	1	-0.212568
PDGFB_PDGFRA	B-cells|M2	1	-0.234465
WNT2_FZD2	B-cells|M2	1	-0.161653
BMP7_SLAMF1	B-cells|M2	1	-0.140826
PLXNB2_SEMA4D	B-cells|M2	1	-0.24127
CD72_SEMA4D	B-cells|M2	1	0.0243197
VEGFA_KDR	B-cells|M2	1	-0.272297
TNFSF14_LTBR	B-cells|M2	1	0.0593553
TNFSF14_TNFRSF14	B-cells|M2	1	-0.0679388
MIF_TNFRSF14	B-cells|M2	1	-0.575615
MIF_TNFRSF10D	B-cells|M2	1	-0.60165
CXCR6_CXCL16	B-cells|M2	1	0.166073
CCR2_CCL8	B-cells|M2	1	1.39506
CCR2_CCL7	B-cells|M2	1	1.57143
IDE_CCL23	B-cells|M2	1	1.49518
NRG1_LSR	B-cells|M2	1	-0.58208
NRG1_MS4A4A	B-cells|M2	1	-0.174621
PLD2_ARF1	B-cells|M2	1	-0.263612
SEMA4A_PLXND1	B-cells|M2	1	0.531069
CEACAM1_CEACAM8	B-cells|M2	1	-1.03505
VEGFA_FLT1	B-cells|M2	1	-0.231075
LRP6_CKLF	B-cells|M2	1	0.136191
COPA_P2RY6	B-cells|M2	0.0009	0.989866
NAMPT_P2RY6	B-cells|M2	1	0.960512
C3_C3AR1	B-cells|M2	1	1.22712
ADORA2A_ENTPD1	B-cells|M2	1	0.415759
ADORA2B_ENTPD1	B-cells|M2	1	0.279768
IL1B_ADRB2	B-cells|M2	1	0.201634
TNFSF9_TNFRSF9	B-cells|M2	1	-0.192645
TNFSF9_ADGRG5	B-cells|M2	1	-0.14401
PROS1_AXL	B-cells|M2	1	0.105678
PROS1_TYRO3	B-cells|M2	1	-0.217591
CSF1R_CSF3	B-cells|M2	1	-0.237864
CSF1R_IL34	B-cells|M2	1	-0.229382
PTPRC_CD22	B-cells|M2	1	0.328836
PTPRC_MRC1	B-cells|M2	0.0009	1.87931
PDGFRB_PDGFD	B-cells|M2	1	-0.195946
CTLA4_CD80	B-cells|M2	1	0.112367
CD28_CD86	B-cells|M2	1	0.757023
CTLA4_CD86	B-cells|M2	1	0.803227
SELP_CD34	B-cells|M2	1	-0.1976
SELP_SELPLG	B-cells|M2	1	0.478195
PDGFRA_PDGFC	B-cells|M2	1	0.231432
FLT4_PDGFC	B-cells|M2	1	0.248535
PECAM1_CD38	B-cells|M2	0.0009	1.09356
C5AR1_RPS19	B-cells|M2	1	-0.625934
AXL_IL15RA	B-cells|M2	1	-0.171368
FLT3_FLT3LG	B-cells|M2	1	0.0468403
LTBR_LTB	B-cells|M2	1	-0.438307
CMKLR1_RARRES2	B-cells|M2	1	-0.212568
CX3CR1_CX3CL1	B-cells|M2	1	-0.375197
LILRA4_BST2	B-cells|M2	1	0.339137
TEK_ANGPT4	B-cells|M2	1	-0.106249
CD47_SIRPG	B-cells|M2	1	-0.142417
ESAM_ESAM	B-cells|M2	1	-0.194295
KLRG2_WNT11	B-cells|MDSC	1	-0.163268
KLRG2_TNFSF9	B-cells|MDSC	1	-0.117161
PVR_TNFSF9	B-cells|MDSC	1	-0.281036
PVR_CD226	B-cells|MDSC	1	-0.318326
PVR_NECTIN3	B-cells|MDSC	1	-0.364013
CADM3_NECTIN3	B-cells|MDSC	1	-0.129734
NECTIN2_NECTIN3	B-cells|MDSC	1	-0.446148
CADM3_CADM4	B-cells|MDSC	1	-0.174621
CD226_NECTIN2	B-cells|MDSC	1	-0.416962
FGF2_FGFR1	B-cells|MDSC	1	-0.261881
FGF2_FGFR3	B-cells|MDSC	1	-0.139236
FGF2_FGFRL1	B-cells|MDSC	1	-0.171368
TGFB1_TGFBR3	B-cells|MDSC	1	0.446786
LAMP1_FAM3C	B-cells|MDSC	1	-0.785875
PDCD1_FAM3C	B-cells|MDSC	1	-0.284546
ADGRG5_FAM3C	B-cells|MDSC	1	-0.248108
CXCR3_CXCL9	B-cells|MDSC	1	-0.129734
DPP4_CXCL9	B-cells|MDSC	1	-0.125006
FCGR2A_CXCL9	B-cells|MDSC	1	0.0621217
EGFR_NRG1	B-cells|MDSC	1	-0.316528
ADGRL1_NRG1	B-cells|MDSC	1	-0.226004
ERBB3_NRG1	B-cells|MDSC	1	-0.312939
EGFR_EGF	B-cells|MDSC	1	-0.384584
EGFR_TGFB1	B-cells|MDSC	1	0.0243197
EGFR_MIF	B-cells|MDSC	1	-0.0985055
CD74_MIF	B-cells|MDSC	0.0009	1.12234
EGFR_GRN	B-cells|MDSC	1	-0.554273
TNFRSF1A_GRN	B-cells|MDSC	1	-0.736966
TNFRSF1B_GRN	B-cells|MDSC	1	-0.504305
EGFR_COPA	B-cells|MDSC	1	-0.541618
CD74_COPA	B-cells|MDSC	1	0.947853
EGFR_EPGN	B-cells|MDSC	1	-0.265345
TNFRSF13B_TNFSF13B	B-cells|MDSC	1	0.227741
TFRC_TNFSF13B	B-cells|MDSC	1	-0.0513992
CD40_TNFSF13B	B-cells|MDSC	1	0.108357
CD74_APP	B-cells|MDSC	1	0.908429
ICAM1_SPN	B-cells|MDSC	1	-0.0985055
ICAM1_ITGAL	B-cells|MDSC	1	0.0922074
TNFRSF1A_FASLG	B-cells|MDSC	1	-0.364013
TNFRSF10B_FASLG	B-cells|MDSC	1	-0.07552
ADORA2A_NAMPT	B-cells|MDSC	1	0.045443
NRP1_VEGFA	B-cells|MDSC	1	-0.142417
NRP2_VEGFA	B-cells|MDSC	1	-0.152003
NRP1_PGF	B-cells|MDSC	1	-0.217591
NRP2_PGF	B-cells|MDSC	1	-0.227692
FLT1_PGF	B-cells|MDSC	1	-0.101598
NRP1_VEGFB	B-cells|MDSC	1	-0.265345
FLT1_VEGFB	B-cells|MDSC	1	-0.14401
ADRB2_VEGFB	B-cells|MDSC	1	-0.12658
NRP2_SEMA3F	B-cells|MDSC	1	-0.246395
GRN_SORT1	B-cells|MDSC	1	-0.826233
COPA_SORT1	B-cells|MDSC	1	-0.349235
LGALS9_DAG1	B-cells|MDSC	1	-0.678072
PLXNB2_SEMA4C	B-cells|MDSC	1	-0.416962
ICOSLG_ICOS	B-cells|MDSC	1	0.0370307
DPP4_CCL11	B-cells|MDSC	1	-0.129734
CCR2_CCL11	B-cells|MDSC	1	-0.184425
HLA-DRB1_OGN	B-cells|MDSC	1	0.835116
NOTCH1_JAG2	B-cells|MDSC	1	-0.279284
NOTCH1_WNT4	B-cells|MDSC	1	-0.390245
CCL24_CCR2	B-cells|MDSC	1	-0.164884
CCL2_CCR2	B-cells|MDSC	1	-0.205896
CCL2_ACKR1	B-cells|MDSC	1	-0.147202
CCL5_ACKR1	B-cells|MDSC	1	-0.229382
PF4_ACKR1	B-cells|MDSC	1	-0.161653
CCL8_ACKR1	B-cells|MDSC	1	-0.176251
CCL7_ACKR1	B-cells|MDSC	1	-0.134477
CXCL10_DPP4	B-cells|MDSC	1	-0.304006
CXCL2_DPP4	B-cells|MDSC	1	-0.390245
PF4_CXCR3	B-cells|MDSC	1	-0.077041
CXCL10_CXCR3	B-cells|MDSC	1	-0.137648
CCL25_CCR9	B-cells|MDSC	1	-0.106249
LGALS9_LRP1	B-cells|MDSC	1	-0.456009
PDGFB_LRP1	B-cells|MDSC	1	-0.323733
LGALS9_CD47	B-cells|MDSC	1	-0.380822
SIRPA_CD47	B-cells|MDSC	1	-0.1976
LGALS9_SLC1A5	B-cells|MDSC	1	-0.655172
LGALS9_COLEC12	B-cells|MDSC	1	-0.430509
LGALS9_HAVCR2	B-cells|MDSC	1	-0.101598
LGALS9_MRC2	B-cells|MDSC	1	-0.323733
PDGFB_PDGFRB	B-cells|MDSC	1	-0.212568
PDGFB_PDGFRA	B-cells|MDSC	1	-0.244685
WNT2_FZD2	B-cells|MDSC	1	-0.161653
BMP7_SLAMF1	B-cells|MDSC	1	-0.107803
PLXNB2_SEMA4D	B-cells|MDSC	1	0.214125
CD72_SEMA4D	B-cells|MDSC	1	0.412511
VEGFA_KDR	B-cells|MDSC	1	-0.316528
TNFSF14_LTBR	B-cells|MDSC	1	-0.244685
TNFSF14_TNFRSF14	B-cells|MDSC	1	0.0071955
MIF_TNFRSF14	B-cells|MDSC	1	-0.469929
MIF_TNFRSF10D	B-cells|MDSC	1	-0.810966
CXCR6_CXCL16	B-cells|MDSC	1	-0.56918
CCR2_CCL8	B-cells|MDSC	1	-0.182786
CCR2_CCL7	B-cells|MDSC	1	-0.21927
IDE_CCL23	B-cells|MDSC	1	-0.0634092
NRG1_LSR	B-cells|MDSC	1	-0.646112
NRG1_MS4A4A	B-cells|MDSC	1	-0.179515
PLD2_ARF1	B-cells|MDSC	1	-0.506353
SEMA4A_PLXND1	B-cells|MDSC	1	-0.334607
CEACAM1_CEACAM8	B-cells|MDSC	1	-1.11092
VEGFA_FLT1	B-cells|MDSC	1	-0.274041
LRP6_CKLF	B-cells|MDSC	1	-0.137648
COPA_P2RY6	B-cells|MDSC	1	-0.187707
NAMPT_P2RY6	B-cells|MDSC	1	-0.254978
C3_C3AR1	B-cells|MDSC	1	-0.242977
ADORA2A_ENTPD1	B-cells|MDSC	1	0.414677
ADORA2B_ENTPD1	B-cells|MDSC	1	0.27858
IL1B_ADRB2	B-cells|MDSC	1	-0.345564
TNFSF9_TNFRSF9	B-cells|MDSC	1	-0.16004
TNFSF9_ADGRG5	B-cells|MDSC	1	-0.14401
PROS1_AXL	B-cells|MDSC	1	-0.318326
PROS1_TYRO3	B-cells|MDSC	1	-0.231075
CSF1R_CSF3	B-cells|MDSC	1	-0.0513992
CSF1R_IL34	B-cells|MDSC	1	-0.229382
PTPRC_CD22	B-cells|MDSC	1	0.157044
PTPRC_MRC1	B-cells|MDSC	1	0.0867838
PDGFRB_PDGFD	B-cells|MDSC	1	-0.195946
CTLA4_CD80	B-cells|MDSC	1	0.200379
CD28_CD86	B-cells|MDSC	1	-0.0740006
CTLA4_CD86	B-cells|MDSC	1	0.0071955
SELP_CD34	B-cells|MDSC	1	-0.202572
SELP_SELPLG	B-cells|MDSC	1	0.041243
PDGFRA_PDGFC	B-cells|MDSC	1	-0.200913
FLT4_PDGFC	B-cells|MDSC	1	-0.176251
PECAM1_CD38	B-cells|MDSC	1	-0.209228
C5AR1_RPS19	B-cells|MDSC	1	NA
AXL_IL15RA	B-cells|MDSC	1	-0.21424
FLT3_FLT3LG	B-cells|MDSC	1	-0.0846703
LTBR_LTB	B-cells|MDSC	1	0.327687
CMKLR1_RARRES2	B-cells|MDSC	1	-0.172994
CX3CR1_CX3CL1	B-cells|MDSC	1	-0.375197
LILRA4_BST2	B-cells|MDSC	1	-0.356606
TEK_ANGPT4	B-cells|MDSC	1	-0.106249
CD47_SIRPG	B-cells|MDSC	1	-0.184425
ESAM_ESAM	B-cells|MDSC	1	-0.163268
KLRG2_WNT11	B-cells|NKT	1	-0.163268
KLRG2_TNFSF9	B-cells|NKT	1	-0.12658
PVR_TNFSF9	B-cells|NKT	1	-0.291592
PVR_CD226	B-cells|NKT	1	0.339137
PVR_NECTIN3	B-cells|NKT	1	-0.364013
CADM3_NECTIN3	B-cells|NKT	1	-0.129734
NECTIN2_NECTIN3	B-cells|NKT	1	-0.446148
CADM3_CADM4	B-cells|NKT	1	-0.174621
CD226_NECTIN2	B-cells|NKT	1	-0.416962
FGF2_FGFR1	B-cells|NKT	1	-0.231075
FGF2_FGFR3	B-cells|NKT	1	-0.171368
FGF2_FGFRL1	B-cells|NKT	1	-0.137648
TGFB1_TGFBR3	B-cells|NKT	1	0.445727
LAMP1_FAM3C	B-cells|NKT	1	-0.878321
PDCD1_FAM3C	B-cells|NKT	1	-0.347399
ADGRG5_FAM3C	B-cells|NKT	1	-0.311148
CXCR3_CXCL9	B-cells|NKT	1	-0.129734
DPP4_CXCL9	B-cells|NKT	1	-0.125006
FCGR2A_CXCL9	B-cells|NKT	1	0.0621217
EGFR_NRG1	B-cells|NKT	1	-0.316528
ADGRL1_NRG1	B-cells|NKT	1	-0.226004
ERBB3_NRG1	B-cells|NKT	1	-0.312939
EGFR_EGF	B-cells|NKT	1	-0.341903
EGFR_TGFB1	B-cells|NKT	1	0.813935
EGFR_MIF	B-cells|NKT	1	-0.671164
CD74_MIF	B-cells|NKT	0.0009	0.903038
EGFR_GRN	B-cells|NKT	1	-0.751465
TNFRSF1A_GRN	B-cells|NKT	1	-0.965784
TNFRSF1B_GRN	B-cells|NKT	1	-0.694321
EGFR_COPA	B-cells|NKT	1	-0.409278
CD74_COPA	B-cells|NKT	1	0.996389
EGFR_EPGN	B-cells|NKT	1	-0.265345
TNFRSF13B_TNFSF13B	B-cells|NKT	1	0.177599
TFRC_TNFSF13B	B-cells|NKT	1	-0.112475
CD40_TNFSF13B	B-cells|NKT	1	0.0551957
CD74_APP	B-cells|NKT	1	0.871844
ICAM1_SPN	B-cells|NKT	0.0009	0.466758
ICAM1_ITGAL	B-cells|NKT	1	0.426533
TNFRSF1A_FASLG	B-cells|NKT	1	1.12367
TNFRSF10B_FASLG	B-cells|NKT	1	1.23266
ADORA2A_NAMPT	B-cells|NKT	1	-0.145605
NRP1_VEGFA	B-cells|NKT	1	0.0299829
NRP2_VEGFA	B-cells|NKT	1	0.0229004
NRP1_PGF	B-cells|NKT	1	-0.217591
NRP2_PGF	B-cells|NKT	1	-0.227692
FLT1_PGF	B-cells|NKT	1	-0.101598
NRP1_VEGFB	B-cells|NKT	1	-0.288065
FLT1_VEGFB	B-cells|NKT	1	-0.166503
ADRB2_VEGFB	B-cells|NKT	1	-0.148801
NRP2_SEMA3F	B-cells|NKT	1	-0.265345
GRN_SORT1	B-cells|NKT	1	-0.852042
COPA_SORT1	B-cells|NKT	1	-0.367732
LGALS9_DAG1	B-cells|NKT	1	-0.595097
PLXNB2_SEMA4C	B-cells|NKT	1	-0.249822
ICOSLG_ICOS	B-cells|NKT	1	0.226509
DPP4_CCL11	B-cells|NKT	1	-0.129734
CCR2_CCL11	B-cells|NKT	1	-0.184425
HLA-DRB1_OGN	B-cells|NKT	1	0.835116
NOTCH1_JAG2	B-cells|NKT	1	-0.199255
NOTCH1_WNT4	B-cells|NKT	1	-0.413115
CCL24_CCR2	B-cells|NKT	1	0.422233
CCL2_CCR2	B-cells|NKT	1	0.393965
CCL2_ACKR1	B-cells|NKT	1	-0.147202
CCL5_ACKR1	B-cells|NKT	1	-0.229382
PF4_ACKR1	B-cells|NKT	1	-0.161653
CCL8_ACKR1	B-cells|NKT	1	-0.176251
CCL7_ACKR1	B-cells|NKT	1	-0.134477
CXCL10_DPP4	B-cells|NKT	1	-0.263612
CXCL2_DPP4	B-cells|NKT	1	-0.347399
PF4_CXCR3	B-cells|NKT	1	-0.0439433
CXCL10_CXCR3	B-cells|NKT	1	-0.103147
CCL25_CCR9	B-cells|NKT	1	-0.106249
LGALS9_LRP1	B-cells|NKT	1	-0.492079
PDGFB_LRP1	B-cells|NKT	1	-0.356606
LGALS9_CD47	B-cells|NKT	1	-0.0203404
SIRPA_CD47	B-cells|NKT	1	0.124328
LGALS9_SLC1A5	B-cells|NKT	1	-0.28279
LGALS9_COLEC12	B-cells|NKT	1	-0.42082
LGALS9_HAVCR2	B-cells|NKT	1	-0.332789
LGALS9_MRC2	B-cells|NKT	1	-0.323733
PDGFB_PDGFRB	B-cells|NKT	1	-0.212568
PDGFB_PDGFRA	B-cells|NKT	1	-0.244685
WNT2_FZD2	B-cells|NKT	1	-0.161653
BMP7_SLAMF1	B-cells|NKT	1	-0.174621
PLXNB2_SEMA4D	B-cells|NKT	1	-0.14401
CD72_SEMA4D	B-cells|NKT	1	0.105678
VEGFA_KDR	B-cells|NKT	1	-0.316528
TNFSF14_LTBR	B-cells|NKT	1	-0.316528
TNFSF14_TNFRSF14	B-cells|NKT	1	0.0384362
MIF_TNFRSF14	B-cells|NKT	1	-0.426625
MIF_TNFRSF10D	B-cells|NKT	1	-0.556393
CXCR6_CXCL16	B-cells|NKT	1	-0.606035
CCR2_CCL8	B-cells|NKT	1	-0.205896
CCR2_CCL7	B-cells|NKT	1	-0.248108
IDE_CCL23	B-cells|NKT	1	-0.286304
NRG1_LSR	B-cells|NKT	1	-0.603841
NRG1_MS4A4A	B-cells|NKT	1	0.922198
PLD2_ARF1	B-cells|NKT	1	-0.231075
SEMA4A_PLXND1	B-cells|NKT	1	-0.330973
CEACAM1_CEACAM8	B-cells|NKT	1	-1.20423
VEGFA_FLT1	B-cells|NKT	1	-0.330973
LRP6_CKLF	B-cells|NKT	1	-0.027675
COPA_P2RY6	B-cells|NKT	1	-0.279284
NAMPT_P2RY6	B-cells|NKT	1	-0.351074
C3_C3AR1	B-cells|NKT	1	-0.265345
ADORA2A_ENTPD1	B-cells|NKT	1	0.154454
ADORA2B_ENTPD1	B-cells|NKT	1	-0.0101344
IL1B_ADRB2	B-cells|NKT	1	-0.272297
TNFSF9_TNFRSF9	B-cells|NKT	1	1.15704
TNFSF9_ADGRG5	B-cells|NKT	1	-0.0484122
PROS1_AXL	B-cells|NKT	1	-0.33825
PROS1_TYRO3	B-cells|NKT	1	-0.231075
CSF1R_CSF3	B-cells|NKT	1	-0.293359
CSF1R_IL34	B-cells|NKT	1	-0.229382
PTPRC_CD22	B-cells|NKT	1	0.196607
PTPRC_MRC1	B-cells|NKT	1	0.0867838
PDGFRB_PDGFD	B-cells|NKT	1	-0.195946
CTLA4_CD80	B-cells|NKT	1	0.0440443
CD28_CD86	B-cells|NKT	1	-0.093879
CTLA4_CD86	B-cells|NKT	1	-0.011588
SELP_CD34	B-cells|NKT	1	-0.190997
SELP_SELPLG	B-cells|NKT	1	0.984042
PDGFRA_PDGFC	B-cells|NKT	1	-0.200913
FLT4_PDGFC	B-cells|NKT	1	-0.176251
PECAM1_CD38	B-cells|NKT	1	-0.013043
C5AR1_RPS19	B-cells|NKT	1	0.045443
AXL_IL15RA	B-cells|NKT	1	-0.314733
FLT3_FLT3LG	B-cells|NKT	1	0.275007
LTBR_LTB	B-cells|NKT	1	0.293959
CMKLR1_RARRES2	B-cells|NKT	1	-0.222633
CX3CR1_CX3CL1	B-cells|NKT	1	-0.356606
LILRA4_BST2	B-cells|NKT	1	-0.411195
TEK_ANGPT4	B-cells|NKT	1	-0.106249
CD47_SIRPG	B-cells|NKT	1	-0.136062
ESAM_ESAM	B-cells|NKT	1	-0.194295
KLRG2_WNT11	B-cells|Progenitor	1	-0.16004
KLRG2_TNFSF9	B-cells|Progenitor	1	-0.176251
PVR_TNFSF9	B-cells|Progenitor	1	-0.345564
PVR_CD226	B-cells|Progenitor	1	-0.316528
PVR_NECTIN3	B-cells|Progenitor	1	-0.289827
CADM3_NECTIN3	B-cells|Progenitor	1	-0.0664274
NECTIN2_NECTIN3	B-cells|Progenitor	1	-0.367732
CADM3_CADM4	B-cells|Progenitor	1	0.140124
CD226_NECTIN2	B-cells|Progenitor	1	0.320773
FGF2_FGFR1	B-cells|Progenitor	1	-0.184425
FGF2_FGFR3	B-cells|Progenitor	1	0.0731347
FGF2_FGFRL1	B-cells|Progenitor	1	0.0565835
TGFB1_TGFBR3	B-cells|Progenitor	1	0.469886
LAMP1_FAM3C	B-cells|Progenitor	1	-0.131313
PDCD1_FAM3C	B-cells|Progenitor	1	0.207893
ADGRG5_FAM3C	B-cells|Progenitor	1	0.232661
CXCR3_CXCL9	B-cells|Progenitor	1	-0.077041
DPP4_CXCL9	B-cells|Progenitor	1	-0.0724828
FCGR2A_CXCL9	B-cells|Progenitor	1	0.108357
EGFR_NRG1	B-cells|Progenitor	1	-0.274041
ADGRL1_NRG1	B-cells|Progenitor	1	-0.186065
ERBB3_NRG1	B-cells|Progenitor	1	-0.270556
EGFR_EGF	B-cells|Progenitor	1	-0.171368
EGFR_TGFB1	B-cells|Progenitor	1	-0.394032
EGFR_MIF	B-cells|Progenitor	1	0.15056
CD74_MIF	B-cells|Progenitor	0.0009	1.23389
EGFR_GRN	B-cells|Progenitor	1	0.212881
TNFRSF1A_GRN	B-cells|Progenitor	1	0.107018
TNFRSF1B_GRN	B-cells|Progenitor	1	0.24245
EGFR_COPA	B-cells|Progenitor	1	0.0935602
CD74_COPA	B-cells|Progenitor	0.0009	1.20727
EGFR_EPGN	B-cells|Progenitor	1	-0.200913
TNFRSF13B_TNFSF13B	B-cells|Progenitor	1	0.187768
TFRC_TNFSF13B	B-cells|Progenitor	1	-0.100051
CD40_TNFSF13B	B-cells|Progenitor	1	0.0662614
CD74_APP	B-cells|Progenitor	0.0009	1.18967
ICAM1_SPN	B-cells|Progenitor	1	-0.16004
ICAM1_ITGAL	B-cells|Progenitor	1	-0.177882
TNFRSF1A_FASLG	B-cells|Progenitor	1	-0.392137
TNFRSF10B_FASLG	B-cells|Progenitor	1	-0.100051
ADORA2A_NAMPT	B-cells|Progenitor	1	0.273814
NRP1_VEGFA	B-cells|Progenitor	1	-0.0785637
NRP2_VEGFA	B-cells|Progenitor	1	-0.0877334
NRP1_PGF	B-cells|Progenitor	1	-0.199255
NRP2_PGF	B-cells|Progenitor	1	-0.207561
FLT1_PGF	B-cells|Progenitor	1	-0.0846703
NRP1_VEGFB	B-cells|Progenitor	1	-0.0380063
FLT1_VEGFB	B-cells|Progenitor	1	0.0648829
ADRB2_VEGFB	B-cells|Progenitor	1	0.0799754
NRP2_SEMA3F	B-cells|Progenitor	1	0.0200577
GRN_SORT1	B-cells|Progenitor	1	-0.0724828
COPA_SORT1	B-cells|Progenitor	0.0009	0.228973
LGALS9_DAG1	B-cells|Progenitor	1	0.0731347
PLXNB2_SEMA4C	B-cells|Progenitor	1	-0.341903
ICOSLG_ICOS	B-cells|Progenitor	1	-0.0335695
DPP4_CCL11	B-cells|Progenitor	1	-0.125006
CCR2_CCL11	B-cells|Progenitor	1	-0.181149
HLA-DRB1_OGN	B-cells|Progenitor	1	0.83754
NOTCH1_JAG2	B-cells|Progenitor	1	-0.2567
NOTCH1_WNT4	B-cells|Progenitor	1	0.308011
CCL24_CCR2	B-cells|Progenitor	1	-0.145605
CCL2_CCR2	B-cells|Progenitor	1	-0.187707
CCL2_ACKR1	B-cells|Progenitor	1	-0.14401
CCL5_ACKR1	B-cells|Progenitor	1	-0.227692
PF4_ACKR1	B-cells|Progenitor	1	-0.158429
CCL8_ACKR1	B-cells|Progenitor	1	-0.172994
CCL7_ACKR1	B-cells|Progenitor	1	-0.131313
CXCL10_DPP4	B-cells|Progenitor	1	-0.12658
CXCL2_DPP4	B-cells|Progenitor	1	-0.204233
PF4_CXCR3	B-cells|Progenitor	1	-0.137648
CXCL10_CXCR3	B-cells|Progenitor	1	-0.200913
CCL25_CCR9	B-cells|Progenitor	1	-0.0262051
LGALS9_LRP1	B-cells|Progenitor	1	-0.42082
PDGFB_LRP1	B-cells|Progenitor	1	-0.291592
LGALS9_CD47	B-cells|Progenitor	1	-0.0740006
SIRPA_CD47	B-cells|Progenitor	1	0.0758749
LGALS9_SLC1A5	B-cells|Progenitor	1	-0.0365259
LGALS9_COLEC12	B-cells|Progenitor	1	-0.314733
LGALS9_HAVCR2	B-cells|Progenitor	1	-0.298673
LGALS9_MRC2	B-cells|Progenitor	1	-0.309359
PDGFB_PDGFRB	B-cells|Progenitor	1	-0.207561
PDGFB_PDGFRA	B-cells|Progenitor	1	-0.242977
WNT2_FZD2	B-cells|Progenitor	1	-0.132894
BMP7_SLAMF1	B-cells|Progenitor	1	-0.123434
PLXNB2_SEMA4D	B-cells|Progenitor	1	-0.316528
CD72_SEMA4D	B-cells|Progenitor	1	-0.0380063
VEGFA_KDR	B-cells|Progenitor	1	-0.312939
TNFSF14_LTBR	B-cells|Progenitor	1	0.077243
TNFSF14_TNFRSF14	B-cells|Progenitor	1	-0.0724828
MIF_TNFRSF14	B-cells|Progenitor	1	-0.58208
MIF_TNFRSF10D	B-cells|Progenitor	1	-0.432455
CXCR6_CXCL16	B-cells|Progenitor	1	0.172488
CCR2_CCL8	B-cells|Progenitor	1	-0.199255
CCR2_CCL7	B-cells|Progenitor	1	-0.234465
IDE_CCL23	B-cells|Progenitor	1	-0.21424
NRG1_LSR	B-cells|Progenitor	1	0.308011
NRG1_MS4A4A	B-cells|Progenitor	1	-0.21424
PLD2_ARF1	B-cells|Progenitor	1	0.16092
SEMA4A_PLXND1	B-cells|Progenitor	1	-0.298673
CEACAM1_CEACAM8	B-cells|Progenitor	1	0.426533
VEGFA_FLT1	B-cells|Progenitor	1	-0.300448
LRP6_CKLF	B-cells|Progenitor	1	-0.172994
COPA_P2RY6	B-cells|Progenitor	1	-0.2567
NAMPT_P2RY6	B-cells|Progenitor	1	-0.327348
C3_C3AR1	B-cells|Progenitor	1	-0.318326
ADORA2A_ENTPD1	B-cells|Progenitor	1	-0.0174171
ADORA2B_ENTPD1	B-cells|Progenitor	1	-0.202572
IL1B_ADRB2	B-cells|Progenitor	1	-0.093879
TNFSF9_TNFRSF9	B-cells|Progenitor	1	-0.163268
TNFSF9_ADGRG5	B-cells|Progenitor	1	-0.139236
PROS1_AXL	B-cells|Progenitor	1	-0.321928
PROS1_TYRO3	B-cells|Progenitor	1	0.240009
CSF1R_CSF3	B-cells|Progenitor	1	-0.246395
CSF1R_IL34	B-cells|Progenitor	1	-0.184425
PTPRC_CD22	B-cells|Progenitor	1	0.171207
PTPRC_MRC1	B-cells|Progenitor	1	0.24732
PDGFRB_PDGFD	B-cells|Progenitor	1	-0.0320936
CTLA4_CD80	B-cells|Progenitor	1	0.0621217
CD28_CD86	B-cells|Progenitor	1	-0.100051
CTLA4_CD86	B-cells|Progenitor	1	-0.0174171
SELP_CD34	B-cells|Progenitor	1	-0.190997
SELP_SELPLG	B-cells|Progenitor	1	-0.251539
PDGFRA_PDGFC	B-cells|Progenitor	1	-0.0394883
FLT4_PDGFC	B-cells|Progenitor	1	-0.0174171
PECAM1_CD38	B-cells|Progenitor	1	-0.148801
C5AR1_RPS19	B-cells|Progenitor	1	-0.16004
AXL_IL15RA	B-cells|Progenitor	1	-0.101598
FLT3_FLT3LG	B-cells|Progenitor	1	-0.0174171
LTBR_LTB	B-cells|Progenitor	1	-0.369595
CMKLR1_RARRES2	B-cells|Progenitor	1	-0.222633
CX3CR1_CX3CL1	B-cells|Progenitor	1	0.137504
LILRA4_BST2	B-cells|Progenitor	1	0.271426
TEK_ANGPT4	B-cells|Progenitor	1	-0.104697
CD47_SIRPG	B-cells|Progenitor	1	-0.181149
ESAM_ESAM	B-cells|Progenitor	1	-0.181149
KLRG2_WNT11	B-cells|Stromal	1	-0.163268
KLRG2_TNFSF9	B-cells|Stromal	1	-0.195946
PVR_TNFSF9	B-cells|Stromal	1	-0.369595
PVR_CD226	B-cells|Stromal	1	-0.318326
PVR_NECTIN3	B-cells|Stromal	1	-0.0335695
CADM3_NECTIN3	B-cells|Stromal	1	0.155749
NECTIN2_NECTIN3	B-cells|Stromal	1	-0.0985055
CADM3_CADM4	B-cells|Stromal	1	-0.16004
CD226_NECTIN2	B-cells|Stromal	1	0.0398403
FGF2_FGFR1	B-cells|Stromal	1	0.051024
FGF2_FGFR3	B-cells|Stromal	1	0.0114956
FGF2_FGFRL1	B-cells|Stromal	1	-0.0709665
TGFB1_TGFBR3	B-cells|Stromal	0.0009	0.820485
LAMP1_FAM3C	B-cells|Stromal	1	-0.694321
PDCD1_FAM3C	B-cells|Stromal	1	-0.217591
ADGRG5_FAM3C	B-cells|Stromal	1	-0.182786
CXCR3_CXCL9	B-cells|Stromal	1	0.541019
DPP4_CXCL9	B-cells|Stromal	1	0.543001
FCGR2A_CXCL9	B-cells|Stromal	1	0.663572
EGFR_NRG1	B-cells|Stromal	1	-0.288065
ADGRL1_NRG1	B-cells|Stromal	1	-0.199255
ERBB3_NRG1	B-cells|Stromal	1	-0.284546
EGFR_EGF	B-cells|Stromal	1	-0.395929
EGFR_TGFB1	B-cells|Stromal	1	0.0881416
EGFR_MIF	B-cells|Stromal	1	-0.831358
CD74_MIF	B-cells|Stromal	0.0009	0.851999
EGFR_GRN	B-cells|Stromal	1	-0.401635
TNFRSF1A_GRN	B-cells|Stromal	1	-0.567041
TNFRSF1B_GRN	B-cells|Stromal	1	-0.356606
EGFR_COPA	B-cells|Stromal	1	-0.132894
CD74_COPA	B-cells|Stromal	0.0009	1.10702
EGFR_EPGN	B-cells|Stromal	1	-0.265345
TNFRSF13B_TNFSF13B	B-cells|Stromal	1	0.199123
TFRC_TNFSF13B	B-cells|Stromal	1	-0.086201
CD40_TNFSF13B	B-cells|Stromal	1	0.077243
CD74_APP	B-cells|Stromal	0.0009	1.35896
ICAM1_SPN	B-cells|Stromal	1	-0.155213
ICAM1_ITGAL	B-cells|Stromal	1	-0.187707
TNFRSF1A_FASLG	B-cells|Stromal	1	-0.397828
TNFRSF10B_FASLG	B-cells|Stromal	1	-0.104697
ADORA2A_NAMPT	B-cells|Stromal	1	0.333424
NRP1_VEGFA	B-cells|Stromal	1	-0.227692
NRP2_VEGFA	B-cells|Stromal	1	-0.237864
NRP1_PGF	B-cells|Stromal	1	0.10165
NRP2_PGF	B-cells|Stromal	1	0.0935602
FLT1_PGF	B-cells|Stromal	1	0.195348
NRP1_VEGFB	B-cells|Stromal	1	-0.217591
FLT1_VEGFB	B-cells|Stromal	1	-0.101598
ADRB2_VEGFB	B-cells|Stromal	1	-0.0846703
NRP2_SEMA3F	B-cells|Stromal	1	0.593593
GRN_SORT1	B-cells|Stromal	1	-0.778432
COPA_SORT1	B-cells|Stromal	1	-0.314733
LGALS9_DAG1	B-cells|Stromal	1	-0.277534
PLXNB2_SEMA4C	B-cells|Stromal	1	0.128293
ICOSLG_ICOS	B-cells|Stromal	1	-0.0262051
DPP4_CCL11	B-cells|Stromal	1	-0.117161
CCR2_CCL11	B-cells|Stromal	1	-0.172994
HLA-DRB1_OGN	B-cells|Stromal	1	0.843984
NOTCH1_JAG2	B-cells|Stromal	1	-0.011588
NOTCH1_WNT4	B-cells|Stromal	1	-0.320126
CCL24_CCR2	B-cells|Stromal	1	-0.150401
CCL2_CCR2	B-cells|Stromal	1	-0.190997
CCL2_ACKR1	B-cells|Stromal	1	1.13027
CCL5_ACKR1	B-cells|Stromal	1	1.09694
PF4_ACKR1	B-cells|Stromal	1	1.12499
CCL8_ACKR1	B-cells|Stromal	1	1.11836
CCL7_ACKR1	B-cells|Stromal	1	1.13619
CXCL10_DPP4	B-cells|Stromal	1	-0.258425
CXCL2_DPP4	B-cells|Stromal	1	-0.343732
PF4_CXCR3	B-cells|Stromal	1	-0.137648
CXCL10_CXCR3	B-cells|Stromal	1	-0.200913
CCL25_CCR9	B-cells|Stromal	1	0.0496308
LGALS9_LRP1	B-cells|Stromal	1	-0.510457
PDGFB_LRP1	B-cells|Stromal	1	-0.373327
LGALS9_CD47	B-cells|Stromal	1	-0.0543923
SIRPA_CD47	B-cells|Stromal	1	0.0935602
LGALS9_SLC1A5	B-cells|Stromal	1	-0.168123
LGALS9_COLEC12	B-cells|Stromal	1	-0.0218044
LGALS9_HAVCR2	B-cells|Stromal	1	-0.314733
LGALS9_MRC2	B-cells|Stromal	1	-0.323733
PDGFB_PDGFRB	B-cells|Stromal	1	-0.192645
PDGFB_PDGFRA	B-cells|Stromal	1	-0.244685
WNT2_FZD2	B-cells|Stromal	1	-0.152003
BMP7_SLAMF1	B-cells|Stromal	1	-0.199255
PLXNB2_SEMA4D	B-cells|Stromal	1	-0.467932
CD72_SEMA4D	B-cells|Stromal	1	-0.161653
VEGFA_KDR	B-cells|Stromal	1	1.4452
TNFSF14_LTBR	B-cells|Stromal	1	-0.011588
TNFSF14_TNFRSF14	B-cells|Stromal	1	-0.086201
MIF_TNFRSF14	B-cells|Stromal	1	-0.603841
MIF_TNFRSF10D	B-cells|Stromal	0.953	-0.104697
CXCR6_CXCL16	B-cells|Stromal	1	-0.448115
CCR2_CCL8	B-cells|Stromal	1	-0.181149
CCR2_CCL7	B-cells|Stromal	1	-0.227692
IDE_CCL23	B-cells|Stromal	1	-0.277534
NRG1_LSR	B-cells|Stromal	1	-0.562772
NRG1_MS4A4A	B-cells|Stromal	1	-0.21927
PLD2_ARF1	B-cells|Stromal	1	-0.205896
SEMA4A_PLXND1	B-cells|Stromal	1	0.571434
CEACAM1_CEACAM8	B-cells|Stromal	1	-0.940645
VEGFA_FLT1	B-cells|Stromal	1	1.66812
LRP6_CKLF	B-cells|Stromal	1	-0.222633
COPA_P2RY6	B-cells|Stromal	1	-0.177882
NAMPT_P2RY6	B-cells|Stromal	1	-0.246395
C3_C3AR1	B-cells|Stromal	1	-0.323733
ADORA2A_ENTPD1	B-cells|Stromal	1	0.608809
ADORA2B_ENTPD1	B-cells|Stromal	1	0.49057
IL1B_ADRB2	B-cells|Stromal	1	0.100305
TNFSF9_TNFRSF9	B-cells|Stromal	1	-0.101598
TNFSF9_ADGRG5	B-cells|Stromal	1	-0.14401
PROS1_AXL	B-cells|Stromal	1	-0.284546
PROS1_TYRO3	B-cells|Stromal	1	-0.202572
CSF1R_CSF3	B-cells|Stromal	1	1.08066
CSF1R_IL34	B-cells|Stromal	1	-0.229382
PTPRC_CD22	B-cells|Stromal	1	0.178874
PTPRC_MRC1	B-cells|Stromal	1	0.149259
PDGFRB_PDGFD	B-cells|Stromal	1	0.0813396
CTLA4_CD80	B-cells|Stromal	1	0.0440443
CD28_CD86	B-cells|Stromal	1	-0.0954196
CTLA4_CD86	B-cells|Stromal	1	-0.011588
SELP_CD34	B-cells|Stromal	1	1.00144
SELP_SELPLG	B-cells|Stromal	1	-0.209228
PDGFRA_PDGFC	B-cells|Stromal	1	-0.0831412
FLT4_PDGFC	B-cells|Stromal	1	-0.0603973
PECAM1_CD38	B-cells|Stromal	0.0009	0.487486
C5AR1_RPS19	B-cells|Stromal	1	0.0071955
AXL_IL15RA	B-cells|Stromal	1	-0.242977
FLT3_FLT3LG	B-cells|Stromal	1	0.138814
LTBR_LTB	B-cells|Stromal	1	-0.428566
CMKLR1_RARRES2	B-cells|Stromal	1	-0.207561
CX3CR1_CX3CL1	B-cells|Stromal	1	-0.202572
LILRA4_BST2	B-cells|Stromal	1	0.0468403
TEK_ANGPT4	B-cells|Stromal	1	-0.106249
CD47_SIRPG	B-cells|Stromal	1	-0.184425
ESAM_ESAM	B-cells|Stromal	1	1.43936
KLRG2_WNT11	B-cells|TAM	1	-0.0800879
KLRG2_TNFSF9	B-cells|TAM	1	0.0482362
PVR_TNFSF9	B-cells|TAM	1	-0.0969617
PVR_CD226	B-cells|TAM	1	-0.234465
PVR_NECTIN3	B-cells|TAM	1	-0.343732
CADM3_NECTIN3	B-cells|TAM	1	-0.112475
NECTIN2_NECTIN3	B-cells|TAM	1	-0.422752
CADM3_CADM4	B-cells|TAM	1	-0.169745
CD226_NECTIN2	B-cells|TAM	1	-0.373327
FGF2_FGFR1	B-cells|TAM	1	-0.253257
FGF2_FGFR3	B-cells|TAM	1	-0.164884
FGF2_FGFRL1	B-cells|TAM	1	-0.161653
TGFB1_TGFBR3	B-cells|TAM	1	0.434028
LAMP1_FAM3C	B-cells|TAM	1	-0.62371
PDCD1_FAM3C	B-cells|TAM	1	-0.166503
ADGRG5_FAM3C	B-cells|TAM	1	-0.134477
CXCR3_CXCL9	B-cells|TAM	1	0.154454
DPP4_CXCL9	B-cells|TAM	1	0.158337
FCGR2A_CXCL9	B-cells|TAM	1	0.312665
EGFR_NRG1	B-cells|TAM	1	-0.0335695
ADGRL1_NRG1	B-cells|TAM	1	0.041243
ERBB3_NRG1	B-cells|TAM	1	-0.0306192
EGFR_EGF	B-cells|TAM	1	-0.392137
EGFR_TGFB1	B-cells|TAM	1	0.475085
EGFR_MIF	B-cells|TAM	1	-0.590745
CD74_MIF	B-cells|TAM	0.0009	0.930548
EGFR_GRN	B-cells|TAM	1	0.465713
TNFRSF1A_GRN	B-cells|TAM	1	0.378512
TNFRSF1B_GRN	B-cells|TAM	1	0.49057
EGFR_COPA	B-cells|TAM	1	-0.281036
CD74_COPA	B-cells|TAM	0.0009	1.04614
EGFR_EPGN	B-cells|TAM	1	-0.265345
TNFRSF13B_TNFSF13B	B-cells|TAM	1	0.585924
TFRC_TNFSF13B	B-cells|TAM	1	0.372952
CD40_TNFSF13B	B-cells|TAM	1	0.494672
CD74_APP	B-cells|TAM	0.0009	1.05102
ICAM1_SPN	B-cells|TAM	1	0.0799754
ICAM1_ITGAL	B-cells|TAM	1	-0.0454314
TNFRSF1A_FASLG	B-cells|TAM	1	-0.382702
TNFRSF10B_FASLG	B-cells|TAM	1	-0.0923402
ADORA2A_NAMPT	B-cells|TAM	1	0.138814
NRP1_VEGFA	B-cells|TAM	1	-0.018878
NRP2_VEGFA	B-cells|TAM	1	-0.027675
NRP1_PGF	B-cells|TAM	1	-0.172994
NRP2_PGF	B-cells|TAM	1	-0.182786
FLT1_PGF	B-cells|TAM	1	-0.0603973
NRP1_VEGFB	B-cells|TAM	1	-0.226004
FLT1_VEGFB	B-cells|TAM	1	-0.109359
ADRB2_VEGFB	B-cells|TAM	1	-0.0908029
NRP2_SEMA3F	B-cells|TAM	1	-0.2567
GRN_SORT1	B-cells|TAM	1	-0.803393
COPA_SORT1	B-cells|TAM	1	-0.332789
LGALS9_DAG1	B-cells|TAM	1	-0.599462
PLXNB2_SEMA4C	B-cells|TAM	1	-0.336428
ICOSLG_ICOS	B-cells|TAM	1	-0.0320936
DPP4_CCL11	B-cells|TAM	1	-0.12658
CCR2_CCL11	B-cells|TAM	1	-0.182786
HLA-DRB1_OGN	B-cells|TAM	1	0.838347
NOTCH1_JAG2	B-cells|TAM	1	-0.21424
NOTCH1_WNT4	B-cells|TAM	1	-0.409278
CCL24_CCR2	B-cells|TAM	1	0.596458
CCL2_CCR2	B-cells|TAM	1	0.572405
CCL2_ACKR1	B-cells|TAM	1	-0.147202
CCL5_ACKR1	B-cells|TAM	1	-0.229382
PF4_ACKR1	B-cells|TAM	1	-0.161653
CCL8_ACKR1	B-cells|TAM	1	-0.176251
CCL7_ACKR1	B-cells|TAM	1	-0.134477
CXCL10_DPP4	B-cells|TAM	1	-0.199255
CXCL2_DPP4	B-cells|TAM	1	-0.281036
PF4_CXCR3	B-cells|TAM	1	-0.0573917
CXCL10_CXCR3	B-cells|TAM	1	-0.117161
CCL25_CCR9	B-cells|TAM	1	-0.0350469
LGALS9_LRP1	B-cells|TAM	1	-0.0816138
PDGFB_LRP1	B-cells|TAM	1	0.0214797
LGALS9_CD47	B-cells|TAM	1	0.0328061
SIRPA_CD47	B-cells|TAM	1	0.172488
LGALS9_SLC1A5	B-cells|TAM	1	-0.516636
LGALS9_COLEC12	B-cells|TAM	1	-0.349235
LGALS9_HAVCR2	B-cells|TAM	1	0.295135
LGALS9_MRC2	B-cells|TAM	1	-0.320126
PDGFB_PDGFRB	B-cells|TAM	1	-0.1976
PDGFB_PDGFRA	B-cells|TAM	1	-0.244685
WNT2_FZD2	B-cells|TAM	1	-0.161653
BMP7_SLAMF1	B-cells|TAM	1	-0.118727
PLXNB2_SEMA4D	B-cells|TAM	1	0.0648829
CD72_SEMA4D	B-cells|TAM	1	0.283329
VEGFA_KDR	B-cells|TAM	1	-0.2567
TNFSF14_LTBR	B-cells|TAM	1	-0.0558912
TNFSF14_TNFRSF14	B-cells|TAM	1	0.0976108
MIF_TNFRSF14	B-cells|TAM	1	-0.345564
MIF_TNFRSF10D	B-cells|TAM	1	-0.625934
CXCR6_CXCL16	B-cells|TAM	1	0.832688
CCR2_CCL8	B-cells|TAM	1	0.582074
CCR2_CCL7	B-cells|TAM	1	0.520045
IDE_CCL23	B-cells|TAM	1	0.708408
NRG1_LSR	B-cells|TAM	1	-0.506353
NRG1_MS4A4A	B-cells|TAM	1	-0.158429
PLD2_ARF1	B-cells|TAM	1	-0.181149
SEMA4A_PLXND1	B-cells|TAM	1	0.107018
CEACAM1_CEACAM8	B-cells|TAM	1	-1.13606
VEGFA_FLT1	B-cells|TAM	1	-0.261881
LRP6_CKLF	B-cells|TAM	1	0.108357
COPA_P2RY6	B-cells|TAM	0.0009	0.916859
NAMPT_P2RY6	B-cells|TAM	1	0.885965
C3_C3AR1	B-cells|TAM	1	0.981853
ADORA2A_ENTPD1	B-cells|TAM	1	0.464668
ADORA2B_ENTPD1	B-cells|TAM	1	0.333424
IL1B_ADRB2	B-cells|TAM	1	-0.22095
TNFSF9_TNFRSF9	B-cells|TAM	1	-0.174621
TNFSF9_ADGRG5	B-cells|TAM	1	-0.011588
PROS1_AXL	B-cells|TAM	1	0.441483
PROS1_TYRO3	B-cells|TAM	1	-0.226004
CSF1R_CSF3	B-cells|TAM	1	-0.258425
CSF1R_IL34	B-cells|TAM	1	-0.229382
PTPRC_CD22	B-cells|TAM	1	0.293959
PTPRC_MRC1	B-cells|TAM	0.0009	0.614474
PDGFRB_PDGFD	B-cells|TAM	1	-0.195946
CTLA4_CD80	B-cells|TAM	1	0.255803
CD28_CD86	B-cells|TAM	1	0.909965
CTLA4_CD86	B-cells|TAM	1	0.952334
SELP_CD34	B-cells|TAM	1	-0.189351
SELP_SELPLG	B-cells|TAM	1	0.403813
PDGFRA_PDGFC	B-cells|TAM	1	-0.164884
FLT4_PDGFC	B-cells|TAM	1	-0.140826
PECAM1_CD38	B-cells|TAM	0.053	0.257011
C5AR1_RPS19	B-cells|TAM	1	-0.237864
AXL_IL15RA	B-cells|TAM	1	-0.24127
FLT3_FLT3LG	B-cells|TAM	1	0.015783
LTBR_LTB	B-cells|TAM	1	-0.413115
CMKLR1_RARRES2	B-cells|TAM	1	-0.209228
CX3CR1_CX3CL1	B-cells|TAM	1	-0.365871
LILRA4_BST2	B-cells|TAM	1	0.266637
TEK_ANGPT4	B-cells|TAM	1	-0.106249
CD47_SIRPG	B-cells|TAM	1	0.14274
ESAM_ESAM	B-cells|TAM	1	-0.190997
KLRG2_WNT11	B-cells|TRM	1	-0.163268
KLRG2_TNFSF9	B-cells|TRM	1	0.167358
PVR_TNFSF9	B-cells|TRM	1	0.0342157
PVR_CD226	B-cells|TRM	1	-0.318326
PVR_NECTIN3	B-cells|TRM	1	-0.364013
CADM3_NECTIN3	B-cells|TRM	1	-0.129734
NECTIN2_NECTIN3	B-cells|TRM	1	-0.446148
CADM3_CADM4	B-cells|TRM	1	-0.0800879
CD226_NECTIN2	B-cells|TRM	1	-0.392137
FGF2_FGFR1	B-cells|TRM	1	-0.281036
FGF2_FGFR3	B-cells|TRM	1	-0.171368
FGF2_FGFRL1	B-cells|TRM	1	-0.171368
TGFB1_TGFBR3	B-cells|TRM	1	0.43082
LAMP1_FAM3C	B-cells|TRM	1	-0.778432
PDCD1_FAM3C	B-cells|TRM	1	-0.279284
ADGRG5_FAM3C	B-cells|TRM	1	-0.242977
CXCR3_CXCL9	B-cells|TRM	1	-0.129734
DPP4_CXCL9	B-cells|TRM	1	-0.125006
FCGR2A_CXCL9	B-cells|TRM	1	0.0621217
EGFR_NRG1	B-cells|TRM	1	-0.272297
ADGRL1_NRG1	B-cells|TRM	1	-0.186065
ERBB3_NRG1	B-cells|TRM	1	-0.270556
EGFR_EGF	B-cells|TRM	1	-0.42082
EGFR_TGFB1	B-cells|TRM	1	0.185232
EGFR_MIF	B-cells|TRM	1	-0.72261
CD74_MIF	B-cells|TRM	0.0009	0.885965
EGFR_GRN	B-cells|TRM	1	-0.132894
TNFRSF1A_GRN	B-cells|TRM	1	-0.268817
TNFRSF1B_GRN	B-cells|TRM	1	-0.0954196
EGFR_COPA	B-cells|TRM	1	-0.547932
CD74_COPA	B-cells|TRM	1	0.945608
EGFR_EPGN	B-cells|TRM	1	-0.265345
TNFRSF13B_TNFSF13B	B-cells|TRM	1	0.553852
TFRC_TNFSF13B	B-cells|TRM	1	0.335712
CD40_TNFSF13B	B-cells|TRM	1	0.459432
CD74_APP	B-cells|TRM	0.0009	0.968644
ICAM1_SPN	B-cells|TRM	1	-0.0649175
ICAM1_ITGAL	B-cells|TRM	1	-0.187707
TNFRSF1A_FASLG	B-cells|TRM	1	-0.397828
TNFRSF10B_FASLG	B-cells|TRM	1	-0.104697
ADORA2A_NAMPT	B-cells|TRM	1	0.00432161
NRP1_VEGFA	B-cells|TRM	1	-0.0588937
NRP2_VEGFA	B-cells|TRM	1	-0.0664274
NRP1_PGF	B-cells|TRM	1	-0.217591
NRP2_PGF	B-cells|TRM	1	-0.227692
FLT1_PGF	B-cells|TRM	1	-0.101598
NRP1_VEGFB	B-cells|TRM	1	-0.202572
FLT1_VEGFB	B-cells|TRM	1	-0.0877334
ADRB2_VEGFB	B-cells|TRM	1	-0.0694519
NRP2_SEMA3F	B-cells|TRM	1	-0.265345
GRN_SORT1	B-cells|TRM	1	-0.852042
COPA_SORT1	B-cells|TRM	1	-0.367732
LGALS9_DAG1	B-cells|TRM	1	-0.584241
PLXNB2_SEMA4C	B-cells|TRM	1	-0.416962
ICOSLG_ICOS	B-cells|TRM	1	-0.0409718
DPP4_CCL11	B-cells|TRM	1	-0.129734
CCR2_CCL11	B-cells|TRM	1	-0.184425
HLA-DRB1_OGN	B-cells|TRM	1	0.835116
NOTCH1_JAG2	B-cells|TRM	1	-0.21424
NOTCH1_WNT4	B-cells|TRM	1	-0.409278
CCL24_CCR2	B-cells|TRM	1	-0.0603973
CCL2_CCR2	B-cells|TRM	1	-0.100051
CCL2_ACKR1	B-cells|TRM	1	-0.147202
CCL5_ACKR1	B-cells|TRM	1	-0.229382
PF4_ACKR1	B-cells|TRM	1	-0.161653
CCL8_ACKR1	B-cells|TRM	1	-0.176251
CCL7_ACKR1	B-cells|TRM	1	-0.134477
CXCL10_DPP4	B-cells|TRM	1	-0.169745
CXCL2_DPP4	B-cells|TRM	1	-0.249822
PF4_CXCR3	B-cells|TRM	1	-0.137648
CXCL10_CXCR3	B-cells|TRM	1	-0.200913
CCL25_CCR9	B-cells|TRM	1	-0.106249
LGALS9_LRP1	B-cells|TRM	1	-0.254978
PDGFB_LRP1	B-cells|TRM	1	-0.139236
LGALS9_CD47	B-cells|TRM	1	-0.343732
SIRPA_CD47	B-cells|TRM	1	-0.164884
LGALS9_SLC1A5	B-cells|TRM	1	-0.397828
LGALS9_COLEC12	B-cells|TRM	1	-0.332789
LGALS9_HAVCR2	B-cells|TRM	1	0.123004
LGALS9_MRC2	B-cells|TRM	1	-0.323733
PDGFB_PDGFRB	B-cells|TRM	1	-0.212568
PDGFB_PDGFRA	B-cells|TRM	1	-0.244685
WNT2_FZD2	B-cells|TRM	1	-0.161653
BMP7_SLAMF1	B-cells|TRM	1	-0.145605
PLXNB2_SEMA4D	B-cells|TRM	1	-0.112475
CD72_SEMA4D	B-cells|TRM	1	0.132248
VEGFA_KDR	B-cells|TRM	1	-0.316528
TNFSF14_LTBR	B-cells|TRM	1	-0.0877334
TNFSF14_TNFRSF14	B-cells|TRM	1	0.0989585
MIF_TNFRSF14	B-cells|TRM	1	-0.343732
MIF_TNFRSF10D	B-cells|TRM	1	-0.68966
CXCR6_CXCL16	B-cells|TRM	1	0.690641
CCR2_CCL8	B-cells|TRM	1	0.707525
CCR2_CCL7	B-cells|TRM	1	0.572405
IDE_CCL23	B-cells|TRM	1	0.169925
NRG1_LSR	B-cells|TRM	1	-0.577767
NRG1_MS4A4A	B-cells|TRM	1	-0.226004
PLD2_ARF1	B-cells|TRM	1	-0.288065
SEMA4A_PLXND1	B-cells|TRM	1	-0.318326
CEACAM1_CEACAM8	B-cells|TRM	1	-0.974262
VEGFA_FLT1	B-cells|TRM	1	-0.217591
LRP6_CKLF	B-cells|TRM	1	0.134878
COPA_P2RY6	B-cells|TRM	0.0009	0.726831
NAMPT_P2RY6	B-cells|TRM	1	0.690641
C3_C3AR1	B-cells|TRM	1	0.719841
ADORA2A_ENTPD1	B-cells|TRM	1	0.124328
ADORA2B_ENTPD1	B-cells|TRM	1	-0.0439433
IL1B_ADRB2	B-cells|TRM	1	-0.215915
TNFSF9_TNFRSF9	B-cells|TRM	1	-0.212568
TNFSF9_ADGRG5	B-cells|TRM	1	-0.0484122
PROS1_AXL	B-cells|TRM	1	0.355016
PROS1_TYRO3	B-cells|TRM	1	-0.231075
CSF1R_CSF3	B-cells|TRM	1	-0.293359
CSF1R_IL34	B-cells|TRM	1	-0.229382
PTPRC_CD22	B-cells|TRM	1	0.235114
PTPRC_MRC1	B-cells|TRM	1	0.0867838
PDGFRB_PDGFD	B-cells|TRM	1	-0.195946
CTLA4_CD80	B-cells|TRM	1	0.248535
CD28_CD86	B-cells|TRM	1	0.864731
CTLA4_CD86	B-cells|TRM	1	0.90766
SELP_CD34	B-cells|TRM	1	-0.244685
SELP_SELPLG	B-cells|TRM	1	-0.0785637
PDGFRA_PDGFC	B-cells|TRM	1	-0.106249
FLT4_PDGFC	B-cells|TRM	1	-0.0831412
PECAM1_CD38	B-cells|TRM	1	-0.0320936
C5AR1_RPS19	B-cells|TRM	1	-0.386468
AXL_IL15RA	B-cells|TRM	1	-0.314733
FLT3_FLT3LG	B-cells|TRM	1	-0.0846703
LTBR_LTB	B-cells|TRM	1	-0.409278
CMKLR1_RARRES2	B-cells|TRM	1	-0.222633
CX3CR1_CX3CL1	B-cells|TRM	1	-0.375197
LILRA4_BST2	B-cells|TRM	1	-0.0218044
TEK_ANGPT4	B-cells|TRM	1	-0.106249
CD47_SIRPG	B-cells|TRM	1	-0.184425
ESAM_ESAM	B-cells|TRM	1	-0.194295
KLRG2_WNT11	Basal|B-cells	1	-0.0573917
KLRG2_TNFSF9	Basal|B-cells	1	-0.106249
PVR_TNFSF9	Basal|B-cells	1	-0.00578235
PVR_CD226	Basal|B-cells	1	0.0482362
PVR_NECTIN3	Basal|B-cells	1	0.0143553
CADM3_NECTIN3	Basal|B-cells	1	-0.128156
NECTIN2_NECTIN3	Basal|B-cells	1	0.0229004
CADM3_CADM4	Basal|B-cells	1	-0.172994
CD226_NECTIN2	Basal|B-cells	1	-0.386468
FGF2_FGFR1	Basal|B-cells	1	-0.222633
FGF2_FGFR3	Basal|B-cells	1	-0.155213
FGF2_FGFRL1	Basal|B-cells	1	-0.15682
TGFB1_TGFBR3	Basal|B-cells	1	-0.0101344
LAMP1_FAM3C	Basal|B-cells	1	-0.106249
PDCD1_FAM3C	Basal|B-cells	1	-0.323733
ADGRG5_FAM3C	Basal|B-cells	1	-0.293359
CXCR3_CXCL9	Basal|B-cells	1	-0.112475
DPP4_CXCL9	Basal|B-cells	1	-0.164884
FCGR2A_CXCL9	Basal|B-cells	1	-0.21424
EGFR_NRG1	Basal|B-cells	1	0.0731347
ADGRL1_NRG1	Basal|B-cells	1	-0.0634092
ERBB3_NRG1	Basal|B-cells	1	-0.226004
EGFR_EGF	Basal|B-cells	1	0.0662614
EGFR_TGFB1	Basal|B-cells	0.0009	0.648005
EGFR_MIF	Basal|B-cells	1	-0.300448
CD74_MIF	Basal|B-cells	1	-1.00868
EGFR_GRN	Basal|B-cells	1	-0.270556
TNFRSF1A_GRN	Basal|B-cells	1	-0.456009
TNFRSF1B_GRN	Basal|B-cells	1	-0.732165
EGFR_COPA	Basal|B-cells	0.377	0.0703893
CD74_COPA	Basal|B-cells	1	-0.444184
EGFR_EPGN	Basal|B-cells	1	0.132248
TNFRSF13B_TNFSF13B	Basal|B-cells	1	-0.013043
TFRC_TNFSF13B	Basal|B-cells	1	0.0524159
CD40_TNFSF13B	Basal|B-cells	1	-0.0350469
CD74_APP	Basal|B-cells	1	-0.841663
ICAM1_SPN	Basal|B-cells	1	0.27262
ICAM1_ITGAL	Basal|B-cells	1	0.16221
TNFRSF1A_FASLG	Basal|B-cells	1	-0.0159576
TNFRSF10B_FASLG	Basal|B-cells	1	0.0271541
ADORA2A_NAMPT	Basal|B-cells	1	-0.236164
NRP1_VEGFA	Basal|B-cells	1	-0.32916
NRP2_VEGFA	Basal|B-cells	1	-0.275786
NRP1_PGF	Basal|B-cells	1	-0.177882
NRP2_PGF	Basal|B-cells	1	-0.128156
FLT1_PGF	Basal|B-cells	1	-0.172994
NRP1_VEGFB	Basal|B-cells	1	-0.275786
FLT1_VEGFB	Basal|B-cells	1	-0.270556
ADRB2_VEGFB	Basal|B-cells	1	-0.0320936
NRP2_SEMA3F	Basal|B-cells	1	-0.163268
GRN_SORT1	Basal|B-cells	1	-0.413115
COPA_SORT1	Basal|B-cells	1	-0.232769
LGALS9_DAG1	Basal|B-cells	1	-0.369595
PLXNB2_SEMA4C	Basal|B-cells	1	-0.103147
ICOSLG_ICOS	Basal|B-cells	1	-0.142417
DPP4_CCL11	Basal|B-cells	1	-0.182786
CCR2_CCL11	Basal|B-cells	1	-0.192645
HLA-DRB1_OGN	Basal|B-cells	1	-0.373327
NOTCH1_JAG2	Basal|B-cells	1	0.136191
NOTCH1_WNT4	Basal|B-cells	1	-0.018878
CCL24_CCR2	Basal|B-cells	1	-0.136062
CCL2_CCR2	Basal|B-cells	1	-0.248108
CCL2_ACKR1	Basal|B-cells	1	-0.217591
CCL5_ACKR1	Basal|B-cells	1	-0.172994
PF4_ACKR1	Basal|B-cells	1	-0.194295
CCL8_ACKR1	Basal|B-cells	1	-0.168123
CCL7_ACKR1	Basal|B-cells	1	-0.202572
CXCL10_DPP4	Basal|B-cells	1	0.168642
CXCL2_DPP4	Basal|B-cells	1	0.149259
PF4_CXCR3	Basal|B-cells	1	-0.171368
CXCL10_CXCR3	Basal|B-cells	1	0.166073
CCL25_CCR9	Basal|B-cells	1	0.0607392
LGALS9_LRP1	Basal|B-cells	1	-0.268817
PDGFB_LRP1	Basal|B-cells	1	0.1137
LGALS9_CD47	Basal|B-cells	1	-0.212568
SIRPA_CD47	Basal|B-cells	1	-0.222633
LGALS9_SLC1A5	Basal|B-cells	0.28	0.102994
LGALS9_COLEC12	Basal|B-cells	1	-0.207561
LGALS9_HAVCR2	Basal|B-cells	1	-0.145605
LGALS9_MRC2	Basal|B-cells	1	-0.137648
PDGFB_PDGFRB	Basal|B-cells	1	0.209141
PDGFB_PDGFRA	Basal|B-cells	1	0.212881
WNT2_FZD2	Basal|B-cells	1	-0.155213
BMP7_SLAMF1	Basal|B-cells	1	0.49774
PLXNB2_SEMA4D	Basal|B-cells	1	-0.0320936
CD72_SEMA4D	Basal|B-cells	1	-0.0923402
VEGFA_KDR	Basal|B-cells	1	0.0172093
TNFSF14_LTBR	Basal|B-cells	1	-0.312939
TNFSF14_TNFRSF14	Basal|B-cells	1	0.0129262
MIF_TNFRSF14	Basal|B-cells	1	0.427606
MIF_TNFRSF10D	Basal|B-cells	1	0.348232
CXCR6_CXCL16	Basal|B-cells	1	-0.573467
CCR2_CCL8	Basal|B-cells	1	-0.212568
CCR2_CCL7	Basal|B-cells	1	-0.169745
IDE_CCL23	Basal|B-cells	1	-0.0380063
NRG1_LSR	Basal|B-cells	1	0.0426443
NRG1_MS4A4A	Basal|B-cells	1	0.331132
PLD2_ARF1	Basal|B-cells	1	-0.37146
SEMA4A_PLXND1	Basal|B-cells	1	-0.0923402
CEACAM1_CEACAM8	Basal|B-cells	1	-0.668868
VEGFA_FLT1	Basal|B-cells	1	0.0731347
LRP6_CKLF	Basal|B-cells	1	0.191563
COPA_P2RY6	Basal|B-cells	1	-0.14401
NAMPT_P2RY6	Basal|B-cells	1	-0.0892673
C3_C3AR1	Basal|B-cells	1	-0.332789
ADORA2A_ENTPD1	Basal|B-cells	1	-0.114035
ADORA2B_ENTPD1	Basal|B-cells	1	-0.0558912
IL1B_ADRB2	Basal|B-cells	1	-0.253257
TNFSF9_TNFRSF9	Basal|B-cells	1	-0.147202
[truncated: 26,351 more rows]
