# Supplementary material for: Defining cellular population dynamics at single cell resolution during prostate cancer progression
Source: bioRxiv preprint, doi:10.1101/2022.03.02.482711, version 1 (2022-03-04)
Supplement: Table S4 [file 482711_file05.xlsx]

## Sheet: S4 CellphoneDB PTEN cx
pair	clusters	pvalue	mean
KLRG2_WNT5B	B-cells|Basal	1	0.00575927
PVR_NECTIN3	B-cells|Basal	1	-0.231075
CADM1_NECTIN3	B-cells|Basal	1	-0.277534
NECTIN1_NECTIN3	B-cells|Basal	1	-0.145605
NECTIN2_NECTIN3	B-cells|Basal	1	-0.304006
CADM1_CADM1	B-cells|Basal	1	-0.265345
NECTIN1_NECTIN4	B-cells|Basal	1	-0.24127
SPP1_CD44	B-cells|Basal	1	0.0186342
LGALS9_CD44	B-cells|Basal	1	-0.0831412
HGF_CD44	B-cells|Basal	1	0.0908534
FGF1_FGFR1	B-cells|Basal	1	-0.137648
FGF1_FGFR2	B-cells|Basal	1	0.22404
CD44_FGFR2	B-cells|Basal	1	0.0786098
TIMP1_FGFR2	B-cells|Basal	1	0.285698
FGFR1_FGFR2	B-cells|Basal	1	0.271426
FGF1_FGFR3	B-cells|Basal	1	-0.115597
FGFR2_FGFR3	B-cells|Basal	1	-0.0365259
SPP1_PTGER4	B-cells|Basal	1	-0.0424568
L1CAM_L1CAM	B-cells|Basal	1	-0.0320936
LAMP1_FAM3C	B-cells|Basal	1	-0.360305
PDCD1_FAM3C	B-cells|Basal	1	0.138814
PDCD1_CD274	B-cells|Basal	1	-0.181149
CD80_CD274	B-cells|Basal	1	-0.0724828
PDCD1_PDCD1LG2	B-cells|Basal	1	-0.139236
EGFR_TGFA	B-cells|Basal	1	-0.103147
EGFR_TGFB1	B-cells|Basal	1	-0.136062
EGFR_MIF	B-cells|Basal	1	0.387363
CD74_MIF	B-cells|Basal	0.0009	1.38681
EGFR_AREG	B-cells|Basal	1	-0.00578235
ICAM1_AREG	B-cells|Basal	1	-0.0380063
EGFR_GRN	B-cells|Basal	1	-0.407364
TNFRSF1A_GRN	B-cells|Basal	1	-0.584241
TNFRSF1B_GRN	B-cells|Basal	1	-0.239566
EGFR_BTC	B-cells|Basal	1	-0.207561
ERBB3_BTC	B-cells|Basal	1	-0.227692
EGFR_COPA	B-cells|Basal	1	-0.21927
CD74_COPA	B-cells|Basal	0.0009	1.11437
EGFR_EPGN	B-cells|Basal	1	0.0922074
EGFR_HBEGF	B-cells|Basal	1	0.269033
CD44_HBEGF	B-cells|Basal	1	0.0908534
TFRC_TNFSF13B	B-cells|Basal	1	-0.263612
CD40_TNFSF13B	B-cells|Basal	1	0.134878
CD74_APP	B-cells|Basal	0.0009	1.20101
ICAM1_SPN	B-cells|Basal	1	-0.284546
ICAM1_ITGAL	B-cells|Basal	1	-0.296899
NRP1_VEGFA	B-cells|Basal	1	-0.0101344
NRP2_VEGFA	B-cells|Basal	1	0.0356239
NRP1_VEGFB	B-cells|Basal	1	-0.046921
NRP2_SEMA3F	B-cells|Basal	1	-0.018878
NRP2_SEMA3C	B-cells|Basal	1	0.0468403
TNF_VSIR	B-cells|Basal	1	-0.309359
CCL3_IDE	B-cells|Basal	1	-0.171368
BDNF_SORT1	B-cells|Basal	1	-0.00868224
GRN_SORT1	B-cells|Basal	1	-0.552156
COPA_SORT1	B-cells|Basal	1	-0.275786
BDNF_F11R	B-cells|Basal	1	0.192825
TNF_DAG1	B-cells|Basal	1	0.0285692
LGALS9_DAG1	B-cells|Basal	1	-0.0306192
TNF_NOTCH1	B-cells|Basal	1	0.077243
TNF_SEMA4C	B-cells|Basal	1	-0.202572
PLXNB2_SEMA4C	B-cells|Basal	1	-0.316528
TNF_FLT4	B-cells|Basal	1	-0.232769
TNF_ICOS	B-cells|Basal	1	-0.279284
TNF_TNFRSF1A	B-cells|Basal	1	-0.137648
TNF_FAS	B-cells|Basal	1	-0.16004
TNF_TNFRSF1B	B-cells|Basal	1	-0.365871
TNF_RIPK1	B-cells|Basal	1	-0.174621
TNFSF10_RIPK1	B-cells|Basal	1	-0.161653
TNF_PTPRS	B-cells|Basal	1	0.361768
PTN_PTPRS	B-cells|Basal	1	0.379621
TNF_CELSR2	B-cells|Basal	1	0.116365
NGFR_BDNF	B-cells|Basal	1	-0.0709665
NCAM1_BDNF	B-cells|Basal	1	-0.0877334
NGFR_NTF4	B-cells|Basal	1	0.178874
NOTCH1_WNT4	B-cells|Basal	1	0.045443
FZD6_WNT4	B-cells|Basal	1	0.0551957
NOTCH1_JAG1	B-cells|Basal	1	0.319618
CCL3L3_DPP4	B-cells|Basal	1	-0.272297
CXCL11_DPP4	B-cells|Basal	1	-0.200913
CXCL10_DPP4	B-cells|Basal	1	-0.380822
CXCL2_DPP4	B-cells|Basal	1	-0.411195
CXCL1_CXCR1	B-cells|Basal	1	-0.0694519
CXCL2_CXCR1	B-cells|Basal	1	-0.229382
PPBP_CXCR1	B-cells|Basal	1	-0.00144342
CXCL3_CXCR1	B-cells|Basal	1	-0.229382
CXCL1_CXCR2	B-cells|Basal	1	-0.0694519
CXCL2_CXCR2	B-cells|Basal	1	-0.229382
PPBP_CXCR2	B-cells|Basal	1	-0.00144342
CXCL3_CXCR2	B-cells|Basal	1	-0.229382
LGALS9_MET	B-cells|Basal	1	-0.0513992
LGALS9_LRP1	B-cells|Basal	1	-0.153607
PDGFB_LRP1	B-cells|Basal	1	-0.0247367
MDK_LRP1	B-cells|Basal	1	-0.0335695
LGALS9_CD47	B-cells|Basal	1	-0.386468
SIRPA_CD47	B-cells|Basal	1	-0.177882
LGALS9_PTPRK	B-cells|Basal	1	-0.205896
WNT5A_PTPRK	B-cells|Basal	1	-0.046921
LGALS9_COLEC12	B-cells|Basal	1	-0.21927
LGALS9_HAVCR2	B-cells|Basal	1	-0.356606
LGALS9_SORL1	B-cells|Basal	1	-0.227692
MDK_SORL1	B-cells|Basal	1	-0.101598
LGALS9_MRC2	B-cells|Basal	1	-0.336428
PDGFB_PDGFRB	B-cells|Basal	1	-0.212568
PDGFB_ADGRV1	B-cells|Basal	1	-0.0908029
WNT4_FZD8	B-cells|Basal	1	-0.166503
WNT5A_FZD1	B-cells|Basal	1	-0.011588
WNT4_FZD1	B-cells|Basal	1	-0.117161
WNT7B_FZD1	B-cells|Basal	1	-0.117161
WNT5A_FZD2	B-cells|Basal	1	-0.0335695
WNT5A_FZD5	B-cells|Basal	1	-0.145605
WNT5A_ANTXR1	B-cells|Basal	1	0.175045
GDF11_ANTXR1	B-cells|Basal	1	0.328836
WNT5A_FZD3	B-cells|Basal	1	-0.150401
TNFRSF10A_TNFSF10	B-cells|Basal	1	-0.202572
TNFRSF11B_TNFSF10	B-cells|Basal	1	-0.132894
TNFRSF10B_TNFSF10	B-cells|Basal	1	-0.202572
TNFRSF10C_TNFSF10	B-cells|Basal	1	-0.202572
FGFR1_NCAM1	B-cells|Basal	1	0.212881
FGFR1_FGF9	B-cells|Basal	1	-0.186065
FGFR3_FGF9	B-cells|Basal	1	-0.0846703
FGFR1_KL	B-cells|Basal	1	-0.172994
FGFR2_EPHA4	B-cells|Basal	1	0.0313952
EFNA1_EPHA4	B-cells|Basal	1	-0.0679388
EFNA4_EPHA4	B-cells|Basal	1	0.0854247
EFNA5_EPHA4	B-cells|Basal	1	0.0257376
EFNB2_EPHA4	B-cells|Basal	1	-0.0954196
FGFR3_EPHA4	B-cells|Basal	1	0.10165
FGFR2_NECTIN1	B-cells|Basal	1	0.266637
FGFR3_NECTIN1	B-cells|Basal	1	0.326537
FGFR2_XPR1	B-cells|Basal	1	-0.0679388
WNT4_SMO	B-cells|Basal	1	-0.0409718
WNT7B_FZD4	B-cells|Basal	1	-0.224317
JAG1_NOTCH3	B-cells|Basal	1	-0.222633
PLXNB2_PTN	B-cells|Basal	1	0.353888
PLXNB2_SEMA4D	B-cells|Basal	1	-0.405451
PLXNB1_SEMA4D	B-cells|Basal	1	-0.1976
CD72_SEMA4D	B-cells|Basal	1	0.128293
TNFSF10_TNFRSF10D	B-cells|Basal	1	-0.0694519
MIF_TNFRSF10D	B-cells|Basal	1	-0.403542
EFNA1_EPHA1	B-cells|Basal	1	-0.0892673
EFNA1_EPHA2	B-cells|Basal	1	0.0593553
EFNA1_EPHA5	B-cells|Basal	1	-0.179515
EFNA4_EPHA5	B-cells|Basal	1	-0.0144996
EFNA5_EPHA5	B-cells|Basal	1	-0.0785637
CXCR6_CXCL16	B-cells|Basal	1	-0.131313
EREG_EGFR	B-cells|Basal	1	0.116365
PLD2_ARF1	B-cells|Basal	1	-0.0513992
SEMA3E_PLXND1	B-cells|Basal	1	-0.131313
SEMA4A_PLXND1	B-cells|Basal	1	-0.320126
EPHB6_EFNB2	B-cells|Basal	1	-0.129734
EPHB2_EFNB2	B-cells|Basal	1	-0.0603973
EPHB6_EFNB1	B-cells|Basal	1	0.0579701
EPHB2_EFNB1	B-cells|Basal	1	0.119024
EPHB3_EFNB1	B-cells|Basal	1	0.041243
EPHB4_EFNB1	B-cells|Basal	1	0.0935602
EPHA4_EFNB1	B-cells|Basal	1	0.0100637
EFNB2_EPHB4	B-cells|Basal	1	-0.164884
EPHB2_EFNA5	B-cells|Basal	1	0.16221
EPHA2_EFNA5	B-cells|Basal	1	-0.100051
EFNB2_EPHB3	B-cells|Basal	1	-0.202572
EPHA1_EFNA4	B-cells|Basal	1	-0.0484122
EPHA2_EFNA4	B-cells|Basal	1	-0.289827
GPR37_PSAP	B-cells|Basal	1	-0.15682
CSF1_SIRPA	B-cells|Basal	1	-0.192645
CEACAM1_CEACAM8	B-cells|Basal	1	-0.915936
VEGFA_EPHB2	B-cells|Basal	1	-0.0484122
FZD6_WNT5A	B-cells|Basal	1	-0.0380063
PLXNC1_SEMA7A	B-cells|Basal	1	0.0440443
LRP6_CKLF	B-cells|Basal	1	-0.110916
COPA_P2RY6	B-cells|Basal	1	-0.343732
NAMPT_P2RY6	B-cells|Basal	1	-0.343732
ADORA3_ENTPD1	B-cells|Basal	1	-0.100051
ANXA1_FPR1	B-cells|Basal	1	-0.751465
ANXA1_FPR2	B-cells|Basal	1	-0.753896
APP_FPR2	B-cells|Basal	1	-0.510457
CSF1R_CSF1	B-cells|Basal	1	-0.261881
CSF1R_CSF3	B-cells|Basal	1	0.228973
CSF1R_IL34	B-cells|Basal	1	-0.22095
MET_HGF	B-cells|Basal	1	-0.195946
CSF3_CSF3R	B-cells|Basal	1	-0.187707
SELL_SELPLG	B-cells|Basal	1	0.276199
SPN_SIGLEC1	B-cells|Basal	1	-0.0513992
FLT4_PDGFC	B-cells|Basal	1	0.217851
C5AR1_RPS19	B-cells|Basal	1	0.329985
CXCR1_CXCL5	B-cells|Basal	1	-0.150401
CXCR2_CXCL5	B-cells|Basal	1	-0.150401
CXCR1_YARS	B-cells|Basal	1	0.0607392
CXCR1_CXCL6	B-cells|Basal	1	-0.150401
CXCR2_CXCL6	B-cells|Basal	1	-0.150401
CD6_ALCAM	B-cells|Basal	1	-0.018878
AXL_IL15RA	B-cells|Basal	1	-0.172994
IL15_IL15RA	B-cells|Basal	1	-0.100051
LTBR_LTB	B-cells|Basal	1	-0.340075
CX3CR1_CX3CL1	B-cells|Basal	1	0.0299829
DSG2_DSC3	B-cells|Basal	1	0.454176
DSC2_DSG2	B-cells|Basal	1	0.0745054
CXCL17_GPR35	B-cells|Basal	1	-0.516636
KLRG2_WNT5B	B-cells|CD8	1	-0.192645
PVR_NECTIN3	B-cells|CD8	1	-0.360305
CADM1_NECTIN3	B-cells|CD8	1	-0.411195
NECTIN1_NECTIN3	B-cells|CD8	1	-0.26708
NECTIN2_NECTIN3	B-cells|CD8	1	-0.440263
CADM1_CADM1	B-cells|CD8	1	-0.685014
NECTIN1_NECTIN4	B-cells|CD8	1	-0.364013
SPP1_CD44	B-cells|CD8	1	-0.500218
LGALS9_CD44	B-cells|CD8	1	-0.648372
HGF_CD44	B-cells|CD8	1	-0.397828
FGF1_FGFR1	B-cells|CD8	1	-0.415037
FGF1_FGFR2	B-cells|CD8	1	-0.438307
CD44_FGFR2	B-cells|CD8	1	-0.675765
TIMP1_FGFR2	B-cells|CD8	1	-0.341903
FGFR1_FGFR2	B-cells|CD8	1	-0.364013
FGF1_FGFR3	B-cells|CD8	1	-0.352916
FGFR2_FGFR3	B-cells|CD8	1	-0.260152
SPP1_PTGER4	B-cells|CD8	1	-0.209228
L1CAM_L1CAM	B-cells|CD8	1	-0.0232698
LAMP1_FAM3C	B-cells|CD8	1	-0.875672
PDCD1_FAM3C	B-cells|CD8	1	-0.205896
PDCD1_CD274	B-cells|CD8	1	-0.011588
CD80_CD274	B-cells|CD8	1	0.0854247
PDCD1_PDCD1LG2	B-cells|CD8	1	0.191563
EGFR_TGFA	B-cells|CD8	1	-0.336428
EGFR_TGFB1	B-cells|CD8	1	0.317304
EGFR_MIF	B-cells|CD8	1	-0.56918
CD74_MIF	B-cells|CD8	0.0009	0.986229
EGFR_AREG	B-cells|CD8	1	-0.307573
ICAM1_AREG	B-cells|CD8	1	-0.345564
EGFR_GRN	B-cells|CD8	1	-0.717857
TNFRSF1A_GRN	B-cells|CD8	1	-0.940645
TNFRSF1B_GRN	B-cells|CD8	1	-0.510457
EGFR_BTC	B-cells|CD8	1	-0.309359
ERBB3_BTC	B-cells|CD8	1	-0.330973
EGFR_COPA	B-cells|CD8	1	-0.442222
CD74_COPA	B-cells|CD8	1	1.03069
EGFR_EPGN	B-cells|CD8	1	-0.275786
EGFR_HBEGF	B-cells|CD8	1	-1.12973
CD44_HBEGF	B-cells|CD8	1	-1.65745
TFRC_TNFSF13B	B-cells|CD8	1	-0.258425
CD40_TNFSF13B	B-cells|CD8	1	0.137504
CD74_APP	B-cells|CD8	1	0.929791
ICAM1_SPN	B-cells|CD8	1	0.380729
ICAM1_ITGAL	B-cells|CD8	1	0.194087
NRP1_VEGFA	B-cells|CD8	1	-0.358454
NRP2_VEGFA	B-cells|CD8	1	-0.302226
NRP1_VEGFB	B-cells|CD8	1	-0.261881
NRP2_SEMA3F	B-cells|CD8	1	-0.195946
NRP2_SEMA3C	B-cells|CD8	1	-0.321928
TNF_VSIR	B-cells|CD8	1	0.015783
CCL3_IDE	B-cells|CD8	1	-0.268817
BDNF_SORT1	B-cells|CD8	1	-0.150401
GRN_SORT1	B-cells|CD8	1	-0.766112
COPA_SORT1	B-cells|CD8	1	-0.448115
BDNF_F11R	B-cells|CD8	1	-0.411195
TNF_DAG1	B-cells|CD8	1	-0.550043
LGALS9_DAG1	B-cells|CD8	1	-0.639355
TNF_NOTCH1	B-cells|CD8	1	-0.265345
TNF_SEMA4C	B-cells|CD8	1	-0.189351
PLXNB2_SEMA4C	B-cells|CD8	1	-0.300448
TNF_FLT4	B-cells|CD8	1	-0.244685
TNF_ICOS	B-cells|CD8	1	0.85599
TNF_TNFRSF1A	B-cells|CD8	1	-0.401635
TNF_FAS	B-cells|CD8	1	-0.172994
TNF_TNFRSF1B	B-cells|CD8	1	0.125651
TNF_RIPK1	B-cells|CD8	1	-0.161653
TNFSF10_RIPK1	B-cells|CD8	1	-0.147202
TNF_PTPRS	B-cells|CD8	1	-0.382702
PTN_PTPRS	B-cells|CD8	1	-0.352916
TNF_CELSR2	B-cells|CD8	1	-0.375197
NGFR_BDNF	B-cells|CD8	1	-0.132894
NCAM1_BDNF	B-cells|CD8	1	-0.150401
NGFR_NTF4	B-cells|CD8	1	-0.158429
NOTCH1_WNT4	B-cells|CD8	1	-0.42082
FZD6_WNT4	B-cells|CD8	1	-0.407364
NOTCH1_JAG1	B-cells|CD8	1	-0.325539
CCL3L3_DPP4	B-cells|CD8	1	-0.153607
CXCL11_DPP4	B-cells|CD8	1	-0.0892673
CXCL10_DPP4	B-cells|CD8	1	-0.253257
CXCL2_DPP4	B-cells|CD8	1	-0.28279
CXCL1_CXCR1	B-cells|CD8	1	-0.0439433
CXCL2_CXCR1	B-cells|CD8	1	-0.202572
PPBP_CXCR1	B-cells|CD8	1	0.0229004
CXCL3_CXCR1	B-cells|CD8	1	-0.202572
CXCL1_CXCR2	B-cells|CD8	1	-0.0439433
CXCL2_CXCR2	B-cells|CD8	1	-0.202572
PPBP_CXCR2	B-cells|CD8	1	0.0229004
CXCL3_CXCR2	B-cells|CD8	1	-0.202572
LGALS9_MET	B-cells|CD8	1	-0.531156
LGALS9_LRP1	B-cells|CD8	1	-0.535332
PDGFB_LRP1	B-cells|CD8	1	-0.369595
MDK_LRP1	B-cells|CD8	1	-0.380822
LGALS9_CD47	B-cells|CD8	1	-0.190997
SIRPA_CD47	B-cells|CD8	1	-0.00723157
LGALS9_PTPRK	B-cells|CD8	1	-0.588574
WNT5A_PTPRK	B-cells|CD8	1	-0.384584
LGALS9_COLEC12	B-cells|CD8	1	-0.382702
LGALS9_HAVCR2	B-cells|CD8	1	-0.281036
LGALS9_SORL1	B-cells|CD8	1	-0.373327
MDK_SORL1	B-cells|CD8	1	-0.234465
LGALS9_MRC2	B-cells|CD8	1	-0.330973
PDGFB_PDGFRB	B-cells|CD8	1	-0.212568
PDGFB_ADGRV1	B-cells|CD8	1	-0.177882
WNT4_FZD8	B-cells|CD8	1	-0.28279
WNT5A_FZD1	B-cells|CD8	1	-0.26708
WNT4_FZD1	B-cells|CD8	1	-0.392137
WNT7B_FZD1	B-cells|CD8	1	-0.392137
WNT5A_FZD2	B-cells|CD8	1	-0.182786
WNT5A_FZD5	B-cells|CD8	1	-0.195946
WNT5A_ANTXR1	B-cells|CD8	1	-0.200913
GDF11_ANTXR1	B-cells|CD8	1	-0.00433459
WNT5A_FZD3	B-cells|CD8	1	-0.207561
TNFRSF10A_TNFSF10	B-cells|CD8	1	-0.174621
TNFRSF11B_TNFSF10	B-cells|CD8	1	-0.107803
TNFRSF10B_TNFSF10	B-cells|CD8	1	-0.174621
TNFRSF10C_TNFSF10	B-cells|CD8	1	-0.174621
FGFR1_NCAM1	B-cells|CD8	1	-0.321928
FGFR1_FGF9	B-cells|CD8	1	-0.253257
FGFR3_FGF9	B-cells|CD8	1	-0.145605
FGFR1_KL	B-cells|CD8	1	-0.1976
FGFR2_EPHA4	B-cells|CD8	1	-0.37707
EFNA1_EPHA4	B-cells|CD8	1	-0.510457
EFNA4_EPHA4	B-cells|CD8	1	-0.305788
EFNA5_EPHA4	B-cells|CD8	1	-0.386468
EFNB2_EPHA4	B-cells|CD8	1	-0.547932
FGFR3_EPHA4	B-cells|CD8	1	-0.284546
FGFR2_NECTIN1	B-cells|CD8	1	-0.382702
FGFR3_NECTIN1	B-cells|CD8	1	-0.288065
FGFR2_XPR1	B-cells|CD8	1	-0.263612
WNT4_SMO	B-cells|CD8	1	-0.390245
WNT7B_FZD4	B-cells|CD8	1	-0.298673
JAG1_NOTCH3	B-cells|CD8	1	-0.367732
PLXNB2_PTN	B-cells|CD8	1	-0.516636
PLXNB2_SEMA4D	B-cells|CD8	1	-0.14401
PLXNB1_SEMA4D	B-cells|CD8	1	0.0313952
CD72_SEMA4D	B-cells|CD8	1	0.313826
TNFSF10_TNFRSF10D	B-cells|CD8	1	-0.22095
MIF_TNFRSF10D	B-cells|CD8	1	-0.599462
EFNA1_EPHA1	B-cells|CD8	1	-0.426625
EFNA1_EPHA2	B-cells|CD8	1	-0.734563
EFNA1_EPHA5	B-cells|CD8	1	-0.318326
EFNA4_EPHA5	B-cells|CD8	1	-0.137648
EFNA5_EPHA5	B-cells|CD8	1	-0.207561
CXCR6_CXCL16	B-cells|CD8	1	-0.606035
EREG_EGFR	B-cells|CD8	1	-0.275786
PLD2_ARF1	B-cells|CD8	1	-0.516636
SEMA3E_PLXND1	B-cells|CD8	1	-0.118727
SEMA4A_PLXND1	B-cells|CD8	1	-0.305788
EPHB6_EFNB2	B-cells|CD8	1	-0.490051
EPHB2_EFNB2	B-cells|CD8	1	-0.401635
EPHB6_EFNB1	B-cells|CD8	1	-0.351074
EPHB2_EFNB1	B-cells|CD8	1	-0.270556
EPHB3_EFNB1	B-cells|CD8	1	-0.373327
EPHB4_EFNB1	B-cells|CD8	1	-0.304006
EPHA4_EFNB1	B-cells|CD8	1	-0.415037
EFNB2_EPHB4	B-cells|CD8	1	-0.416962
EPHB2_EFNA5	B-cells|CD8	1	-0.234465
EPHA2_EFNA5	B-cells|CD8	1	-0.590745
EFNB2_EPHB3	B-cells|CD8	1	-0.500218
EPHA1_EFNA4	B-cells|CD8	1	-0.249822
EPHA2_EFNA4	B-cells|CD8	1	-0.531156
GPR37_PSAP	B-cells|CD8	1	-0.768568
CSF1_SIRPA	B-cells|CD8	1	-0.199255
CEACAM1_CEACAM8	B-cells|CD8	1	-1.18771
VEGFA_EPHB2	B-cells|CD8	1	-0.268817
FZD6_WNT5A	B-cells|CD8	1	-0.234465
PLXNC1_SEMA7A	B-cells|CD8	1	0.0496308
LRP6_CKLF	B-cells|CD8	1	-0.0159576
COPA_P2RY6	B-cells|CD8	1	-0.356606
NAMPT_P2RY6	B-cells|CD8	1	-0.356606
ADORA3_ENTPD1	B-cells|CD8	1	-0.0558912
ANXA1_FPR1	B-cells|CD8	1	-0.771027
ANXA1_FPR2	B-cells|CD8	1	-0.766112
APP_FPR2	B-cells|CD8	1	-0.520769
CSF1R_CSF1	B-cells|CD8	1	-0.334607
CSF1R_CSF3	B-cells|CD8	1	-0.286304
CSF1R_IL34	B-cells|CD8	1	-0.244685
MET_HGF	B-cells|CD8	1	-0.307573
CSF3_CSF3R	B-cells|CD8	1	-0.190997
SELL_SELPLG	B-cells|CD8	1	1.05728
SPN_SIGLEC1	B-cells|CD8	1	-0.0679388
FLT4_PDGFC	B-cells|CD8	1	-0.164884
C5AR1_RPS19	B-cells|CD8	1	0.266637
CXCR1_CXCL5	B-cells|CD8	1	-0.307573
CXCR2_CXCL5	B-cells|CD8	1	-0.307573
CXCR1_YARS	B-cells|CD8	1	-0.0954196
CXCR1_CXCL6	B-cells|CD8	1	-0.307573
CXCR2_CXCL6	B-cells|CD8	1	-0.307573
CD6_ALCAM	B-cells|CD8	1	-0.422752
AXL_IL15RA	B-cells|CD8	1	-0.275786
IL15_IL15RA	B-cells|CD8	1	-0.199255
LTBR_LTB	B-cells|CD8	1	0.847997
CX3CR1_CX3CL1	B-cells|CD8	1	-0.349235
DSG2_DSC3	B-cells|CD8	1	-0.347399
DSC2_DSG2	B-cells|CD8	1	-0.354759
CXCL17_GPR35	B-cells|CD8	1	-0.481969
KLRG2_WNT5B	B-cells|DC	1	-0.192645
PVR_NECTIN3	B-cells|DC	1	-0.360305
CADM1_NECTIN3	B-cells|DC	1	-0.411195
NECTIN1_NECTIN3	B-cells|DC	1	-0.26708
NECTIN2_NECTIN3	B-cells|DC	1	-0.440263
CADM1_CADM1	B-cells|DC	1	-0.545824
NECTIN1_NECTIN4	B-cells|DC	1	-0.327348
SPP1_CD44	B-cells|DC	1	-0.336428
LGALS9_CD44	B-cells|DC	1	-0.467932
HGF_CD44	B-cells|DC	1	-0.244685
FGF1_FGFR1	B-cells|DC	1	-0.291592
FGF1_FGFR2	B-cells|DC	1	-0.446148
CD44_FGFR2	B-cells|DC	1	-0.687335
TIMP1_FGFR2	B-cells|DC	1	-0.351074
FGFR1_FGFR2	B-cells|DC	1	-0.373327
FGF1_FGFR3	B-cells|DC	1	-0.349235
FGFR2_FGFR3	B-cells|DC	1	-0.2567
SPP1_PTGER4	B-cells|DC	1	0.112367
L1CAM_L1CAM	B-cells|DC	1	-0.115597
LAMP1_FAM3C	B-cells|DC	1	-1.14561
PDCD1_FAM3C	B-cells|DC	1	-0.369595
PDCD1_CD274	B-cells|DC	1	0.231432
CD80_CD274	B-cells|DC	1	0.313826
PDCD1_PDCD1LG2	B-cells|DC	1	0.141433
EGFR_TGFA	B-cells|DC	1	-0.347399
EGFR_TGFB1	B-cells|DC	1	0.441483
EGFR_MIF	B-cells|DC	1	-0.621488
CD74_MIF	B-cells|DC	0.0009	0.968644
EGFR_AREG	B-cells|DC	1	-0.349235
ICAM1_AREG	B-cells|DC	1	-0.388355
EGFR_GRN	B-cells|DC	1	-0.202572
TNFRSF1A_GRN	B-cells|DC	1	-0.354759
TNFRSF1B_GRN	B-cells|DC	1	-0.0558912
EGFR_BTC	B-cells|DC	1	-0.323733
ERBB3_BTC	B-cells|DC	1	-0.345564
EGFR_COPA	B-cells|DC	1	-0.300448
CD74_COPA	B-cells|DC	0.0009	1.08338
EGFR_EPGN	B-cells|DC	1	-0.275786
EGFR_HBEGF	B-cells|DC	1	-1.1488
CD44_HBEGF	B-cells|DC	1	-1.68966
TFRC_TNFSF13B	B-cells|DC	1	-0.224317
CD40_TNFSF13B	B-cells|DC	1	0.164786
CD74_APP	B-cells|DC	0.0009	1.03703
ICAM1_SPN	B-cells|DC	1	-0.199255
ICAM1_ITGAL	B-cells|DC	1	-0.139236
NRP1_VEGFA	B-cells|DC	1	-0.128156
NRP2_VEGFA	B-cells|DC	1	-0.0800879
NRP1_VEGFB	B-cells|DC	1	-0.244685
NRP2_SEMA3F	B-cells|DC	1	-0.161653
NRP2_SEMA3C	B-cells|DC	1	-0.334607
TNF_VSIR	B-cells|DC	1	-0.123434
CCL3_IDE	B-cells|DC	1	-0.367732
BDNF_SORT1	B-cells|DC	1	-0.123434
GRN_SORT1	B-cells|DC	1	-0.724993
COPA_SORT1	B-cells|DC	1	-0.415037
BDNF_F11R	B-cells|DC	1	-0.340075
TNF_DAG1	B-cells|DC	1	-0.560643
LGALS9_DAG1	B-cells|DC	1	-0.650635
TNF_NOTCH1	B-cells|DC	1	-0.316528
TNF_SEMA4C	B-cells|DC	1	-0.237864
PLXNB2_SEMA4C	B-cells|DC	1	-0.352916
TNF_FLT4	B-cells|DC	1	-0.2567
TNF_ICOS	B-cells|DC	1	-0.274041
TNF_TNFRSF1A	B-cells|DC	1	0.0398403
TNF_FAS	B-cells|DC	1	-0.190997
TNF_TNFRSF1B	B-cells|DC	1	0.243669
TNF_RIPK1	B-cells|DC	1	-0.140826
TNFSF10_RIPK1	B-cells|DC	1	-0.128156
TNF_PTPRS	B-cells|DC	1	-0.137648
PTN_PTPRS	B-cells|DC	1	-0.112475
TNF_CELSR2	B-cells|DC	1	-0.380822
NGFR_BDNF	B-cells|DC	1	-0.093879
NCAM1_BDNF	B-cells|DC	1	-0.109359
NGFR_NTF4	B-cells|DC	1	-0.212568
NOTCH1_WNT4	B-cells|DC	1	-0.37707
FZD6_WNT4	B-cells|DC	1	-0.362158
NOTCH1_JAG1	B-cells|DC	1	-0.327348
CCL3L3_DPP4	B-cells|DC	1	0.290424
CXCL11_DPP4	B-cells|DC	1	0.337996
CXCL10_DPP4	B-cells|DC	1	0.217851
CXCL2_DPP4	B-cells|DC	1	0.196607
CXCL1_CXCR1	B-cells|DC	1	-0.00144342
CXCL2_CXCR1	B-cells|DC	1	-0.153607
PPBP_CXCR1	B-cells|DC	1	0.0635029
CXCL3_CXCR1	B-cells|DC	1	-0.153607
CXCL1_CXCR2	B-cells|DC	1	-0.00144342
CXCL2_CXCR2	B-cells|DC	1	-0.153607
PPBP_CXCR2	B-cells|DC	1	0.0635029
CXCL3_CXCR2	B-cells|DC	1	-0.153607
LGALS9_MET	B-cells|DC	1	-0.490051
LGALS9_LRP1	B-cells|DC	1	-0.249822
PDGFB_LRP1	B-cells|DC	1	-0.112475
MDK_LRP1	B-cells|DC	1	-0.121863
LGALS9_CD47	B-cells|DC	1	0.182692
SIRPA_CD47	B-cells|DC	1	0.326537
LGALS9_PTPRK	B-cells|DC	1	-0.592919
WNT5A_PTPRK	B-cells|DC	1	-0.388355
LGALS9_COLEC12	B-cells|DC	1	-0.384584
LGALS9_HAVCR2	B-cells|DC	1	0.358396
LGALS9_SORL1	B-cells|DC	1	-0.486004
MDK_SORL1	B-cells|DC	1	-0.336428
LGALS9_MRC2	B-cells|DC	1	-0.351074
PDGFB_PDGFRB	B-cells|DC	1	-0.212568
PDGFB_ADGRV1	B-cells|DC	1	-0.150401
WNT4_FZD8	B-cells|DC	1	-0.28279
WNT5A_FZD1	B-cells|DC	1	-0.270556
WNT4_FZD1	B-cells|DC	1	-0.395929
WNT7B_FZD1	B-cells|DC	1	-0.397828
WNT5A_FZD2	B-cells|DC	1	-0.182786
WNT5A_FZD5	B-cells|DC	1	-0.229382
WNT5A_ANTXR1	B-cells|DC	1	-0.204233
GDF11_ANTXR1	B-cells|DC	1	-0.00723157
WNT5A_FZD3	B-cells|DC	1	-0.217591
TNFRSF10A_TNFSF10	B-cells|DC	1	-0.261881
TNFRSF11B_TNFSF10	B-cells|DC	1	-0.190997
TNFRSF10B_TNFSF10	B-cells|DC	1	-0.261881
TNFRSF10C_TNFSF10	B-cells|DC	1	-0.261881
FGFR1_NCAM1	B-cells|DC	1	-0.295128
FGFR1_FGF9	B-cells|DC	1	-0.232769
FGFR3_FGF9	B-cells|DC	1	-0.12658
FGFR1_KL	B-cells|DC	1	-0.205896
FGFR2_EPHA4	B-cells|DC	1	-0.349235
EFNA1_EPHA4	B-cells|DC	1	-0.481969
EFNA4_EPHA4	B-cells|DC	1	-0.279284
EFNA5_EPHA4	B-cells|DC	1	-0.358454
EFNB2_EPHA4	B-cells|DC	1	-0.516636
FGFR3_EPHA4	B-cells|DC	1	-0.258425
FGFR2_NECTIN1	B-cells|DC	1	-0.0634092
FGFR3_NECTIN1	B-cells|DC	1	0.0114956
FGFR2_XPR1	B-cells|DC	1	-0.174621
WNT4_SMO	B-cells|DC	1	-0.394032
WNT7B_FZD4	B-cells|DC	1	-0.209228
JAG1_NOTCH3	B-cells|DC	1	-0.279284
PLXNB2_PTN	B-cells|DC	1	-0.516636
PLXNB2_SEMA4D	B-cells|DC	1	-0.0679388
PLXNB1_SEMA4D	B-cells|DC	1	0.0989585
CD72_SEMA4D	B-cells|DC	1	0.369606
TNFSF10_TNFRSF10D	B-cells|DC	1	-0.302226
MIF_TNFRSF10D	B-cells|DC	1	-0.706041
EFNA1_EPHA1	B-cells|DC	1	-0.434403
EFNA1_EPHA2	B-cells|DC	1	-0.617056
EFNA1_EPHA5	B-cells|DC	1	-0.246395
EFNA4_EPHA5	B-cells|DC	1	-0.0740006
EFNA5_EPHA5	B-cells|DC	1	-0.140826
CXCR6_CXCL16	B-cells|DC	1	0.568519
EREG_EGFR	B-cells|DC	1	-0.270556
PLD2_ARF1	B-cells|DC	1	-0.351074
SEMA3E_PLXND1	B-cells|DC	1	0.164786
SEMA4A_PLXND1	B-cells|DC	1	0.0129262
EPHB6_EFNB2	B-cells|DC	1	-0.481969
EPHB2_EFNB2	B-cells|DC	1	-0.394032
EPHB6_EFNB1	B-cells|DC	1	-0.373327
EPHB2_EFNB1	B-cells|DC	1	-0.291592
EPHB3_EFNB1	B-cells|DC	1	-0.395929
EPHB4_EFNB1	B-cells|DC	1	-0.325539
EPHA4_EFNB1	B-cells|DC	1	-0.436354
EFNB2_EPHB4	B-cells|DC	1	-0.430509
EPHB2_EFNA5	B-cells|DC	1	-0.237864
EPHA2_EFNA5	B-cells|DC	1	-0.595097
EFNB2_EPHB3	B-cells|DC	1	-0.504305
EPHA1_EFNA4	B-cells|DC	1	-0.229382
EPHA2_EFNA4	B-cells|DC	1	-0.506353
GPR37_PSAP	B-cells|DC	1	0.334568
CSF1_SIRPA	B-cells|DC	1	0.00575927
CEACAM1_CEACAM8	B-cells|DC	1	-1.18442
VEGFA_EPHB2	B-cells|DC	1	-0.2567
FZD6_WNT5A	B-cells|DC	1	-0.234465
PLXNC1_SEMA7A	B-cells|DC	1	0.574344
LRP6_CKLF	B-cells|DC	1	0.0482362
COPA_P2RY6	B-cells|DC	1	-0.0709665
NAMPT_P2RY6	B-cells|DC	1	-0.0709665
ADORA3_ENTPD1	B-cells|DC	1	0.126973
ANXA1_FPR1	B-cells|DC	1	-0.771027
ANXA1_FPR2	B-cells|DC	1	-0.72738
APP_FPR2	B-cells|DC	1	-0.488026
CSF1R_CSF1	B-cells|DC	1	-0.32916
CSF1R_CSF3	B-cells|DC	1	-0.311148
CSF1R_IL34	B-cells|DC	1	-0.244685
MET_HGF	B-cells|DC	1	-0.204233
CSF3_CSF3R	B-cells|DC	1	-0.0846703
SELL_SELPLG	B-cells|DC	1	0.953079
SPN_SIGLEC1	B-cells|DC	1	-0.0291463
FLT4_PDGFC	B-cells|DC	1	-0.176251
C5AR1_RPS19	B-cells|DC	1	0.197865
CXCR1_CXCL5	B-cells|DC	1	-0.291592
CXCR2_CXCL5	B-cells|DC	1	-0.291592
CXCR1_YARS	B-cells|DC	1	-0.0573917
CXCR1_CXCL6	B-cells|DC	1	-0.291592
CXCR2_CXCL6	B-cells|DC	1	-0.291592
CD6_ALCAM	B-cells|DC	1	-0.0558912
AXL_IL15RA	B-cells|DC	1	-0.199255
IL15_IL15RA	B-cells|DC	1	-0.125006
LTBR_LTB	B-cells|DC	1	-0.0320936
CX3CR1_CX3CL1	B-cells|DC	1	-0.340075
DSG2_DSC3	B-cells|DC	1	-0.330973
DSC2_DSG2	B-cells|DC	1	-0.378944
CXCL17_GPR35	B-cells|DC	1	0.0426443
KLRG2_WNT5B	B-cells|Delta-Gamma	1	-0.192645
PVR_NECTIN3	B-cells|Delta-Gamma	1	-0.302226
CADM1_NECTIN3	B-cells|Delta-Gamma	1	-0.351074
NECTIN1_NECTIN3	B-cells|Delta-Gamma	1	-0.212568
NECTIN2_NECTIN3	B-cells|Delta-Gamma	1	-0.378944
CADM1_CADM1	B-cells|Delta-Gamma	1	-0.648372
NECTIN1_NECTIN4	B-cells|Delta-Gamma	1	-0.37707
SPP1_CD44	B-cells|Delta-Gamma	1	-0.356606
LGALS9_CD44	B-cells|Delta-Gamma	1	-0.492079
HGF_CD44	B-cells|Delta-Gamma	1	-0.265345
FGF1_FGFR1	B-cells|Delta-Gamma	1	-0.490051
FGF1_FGFR2	B-cells|Delta-Gamma	1	-0.456009
CD44_FGFR2	B-cells|Delta-Gamma	1	-0.698998
TIMP1_FGFR2	B-cells|Delta-Gamma	1	-0.360305
FGFR1_FGFR2	B-cells|Delta-Gamma	1	-0.382702
FGF1_FGFR3	B-cells|Delta-Gamma	1	-0.365871
FGFR2_FGFR3	B-cells|Delta-Gamma	1	-0.272297
SPP1_PTGER4	B-cells|Delta-Gamma	1	-0.186065
L1CAM_L1CAM	B-cells|Delta-Gamma	1	-0.0846703
LAMP1_FAM3C	B-cells|Delta-Gamma	1	-1.152
PDCD1_FAM3C	B-cells|Delta-Gamma	1	-0.37146
PDCD1_CD274	B-cells|Delta-Gamma	1	-0.123434
CD80_CD274	B-cells|Delta-Gamma	1	-0.018878
PDCD1_PDCD1LG2	B-cells|Delta-Gamma	1	0.0071955
EGFR_TGFA	B-cells|Delta-Gamma	1	-0.360305
EGFR_TGFB1	B-cells|Delta-Gamma	1	0.325386
EGFR_MIF	B-cells|Delta-Gamma	1	-0.595097
CD74_MIF	B-cells|Delta-Gamma	0.0009	0.977463
EGFR_AREG	B-cells|Delta-Gamma	1	-0.268817
ICAM1_AREG	B-cells|Delta-Gamma	1	-0.305788
EGFR_GRN	B-cells|Delta-Gamma	1	-0.751465
TNFRSF1A_GRN	B-cells|Delta-Gamma	1	-0.9771
TNFRSF1B_GRN	B-cells|Delta-Gamma	1	-0.53952
EGFR_BTC	B-cells|Delta-Gamma	1	-0.351074
ERBB3_BTC	B-cells|Delta-Gamma	1	-0.373327
EGFR_COPA	B-cells|Delta-Gamma	1	-0.413115
CD74_COPA	B-cells|Delta-Gamma	1	1.04124
EGFR_EPGN	B-cells|Delta-Gamma	1	-0.275786
EGFR_HBEGF	B-cells|Delta-Gamma	1	-1.12658
CD44_HBEGF	B-cells|Delta-Gamma	1	-1.6529
TFRC_TNFSF13B	B-cells|Delta-Gamma	1	-0.279284
CD40_TNFSF13B	B-cells|Delta-Gamma	1	0.123004
CD74_APP	B-cells|Delta-Gamma	1	0.927517
ICAM1_SPN	B-cells|Delta-Gamma	1	0.190299
ICAM1_ITGAL	B-cells|Delta-Gamma	1	0.304511
NRP1_VEGFA	B-cells|Delta-Gamma	1	-0.21424
NRP2_VEGFA	B-cells|Delta-Gamma	1	-0.161653
NRP1_VEGFB	B-cells|Delta-Gamma	1	-0.327348
NRP2_SEMA3F	B-cells|Delta-Gamma	1	-0.209228
NRP2_SEMA3C	B-cells|Delta-Gamma	1	-0.341903
TNF_VSIR	B-cells|Delta-Gamma	1	-0.0513992
CCL3_IDE	B-cells|Delta-Gamma	1	-0.33825
BDNF_SORT1	B-cells|Delta-Gamma	1	-0.15682
GRN_SORT1	B-cells|Delta-Gamma	1	-0.77596
COPA_SORT1	B-cells|Delta-Gamma	1	-0.456009
BDNF_F11R	B-cells|Delta-Gamma	1	-0.394032
TNF_DAG1	B-cells|Delta-Gamma	1	-0.590745
LGALS9_DAG1	B-cells|Delta-Gamma	1	-0.682696
TNF_NOTCH1	B-cells|Delta-Gamma	1	-0.305788
TNF_SEMA4C	B-cells|Delta-Gamma	1	-0.0365259
PLXNB2_SEMA4C	B-cells|Delta-Gamma	1	-0.137648
TNF_FLT4	B-cells|Delta-Gamma	1	-0.2567
TNF_ICOS	B-cells|Delta-Gamma	1	1.94897
TNF_TNFRSF1A	B-cells|Delta-Gamma	1	-0.325539
TNF_FAS	B-cells|Delta-Gamma	1	-0.289827
TNF_TNFRSF1B	B-cells|Delta-Gamma	1	0.391768
TNF_RIPK1	B-cells|Delta-Gamma	1	-0.298673
TNFSF10_RIPK1	B-cells|Delta-Gamma	1	-0.28279
TNF_PTPRS	B-cells|Delta-Gamma	1	-0.296899
PTN_PTPRS	B-cells|Delta-Gamma	1	-0.268817
TNF_CELSR2	B-cells|Delta-Gamma	1	-0.394032
NGFR_BDNF	B-cells|Delta-Gamma	1	-0.155213
NCAM1_BDNF	B-cells|Delta-Gamma	1	-0.172994
NGFR_NTF4	B-cells|Delta-Gamma	1	-0.212568
NOTCH1_WNT4	B-cells|Delta-Gamma	1	-0.354759
FZD6_WNT4	B-cells|Delta-Gamma	1	-0.341903
NOTCH1_JAG1	B-cells|Delta-Gamma	1	-0.182786
CCL3L3_DPP4	B-cells|Delta-Gamma	1	-0.209228
CXCL11_DPP4	B-cells|Delta-Gamma	1	-0.140826
CXCL10_DPP4	B-cells|Delta-Gamma	1	-0.312939
CXCL2_DPP4	B-cells|Delta-Gamma	1	-0.341903
CXCL1_CXCR1	B-cells|Delta-Gamma	1	-0.192645
CXCL2_CXCR1	B-cells|Delta-Gamma	1	-0.367732
PPBP_CXCR1	B-cells|Delta-Gamma	1	-0.118727
CXCL3_CXCR1	B-cells|Delta-Gamma	1	-0.367732
CXCL1_CXCR2	B-cells|Delta-Gamma	1	-0.192645
CXCL2_CXCR2	B-cells|Delta-Gamma	1	-0.367732
PPBP_CXCR2	B-cells|Delta-Gamma	1	-0.118727
CXCL3_CXCR2	B-cells|Delta-Gamma	1	-0.367732
LGALS9_MET	B-cells|Delta-Gamma	1	-0.550043
LGALS9_LRP1	B-cells|Delta-Gamma	1	-0.545824
PDGFB_LRP1	B-cells|Delta-Gamma	1	-0.37707
MDK_LRP1	B-cells|Delta-Gamma	1	-0.390245
LGALS9_CD47	B-cells|Delta-Gamma	1	-0.311148
SIRPA_CD47	B-cells|Delta-Gamma	1	-0.114035
LGALS9_PTPRK	B-cells|Delta-Gamma	1	-0.562772
WNT5A_PTPRK	B-cells|Delta-Gamma	1	-0.364013
LGALS9_COLEC12	B-cells|Delta-Gamma	1	-0.394032
LGALS9_HAVCR2	B-cells|Delta-Gamma	1	-0.360305
LGALS9_SORL1	B-cells|Delta-Gamma	1	-0.481969
MDK_SORL1	B-cells|Delta-Gamma	1	-0.330973
LGALS9_MRC2	B-cells|Delta-Gamma	1	-0.351074
PDGFB_PDGFRB	B-cells|Delta-Gamma	1	-0.212568
PDGFB_ADGRV1	B-cells|Delta-Gamma	1	-0.195946
WNT4_FZD8	B-cells|Delta-Gamma	1	-0.227692
WNT5A_FZD1	B-cells|Delta-Gamma	1	-0.270556
WNT4_FZD1	B-cells|Delta-Gamma	1	-0.395929
WNT7B_FZD1	B-cells|Delta-Gamma	1	-0.397828
WNT5A_FZD2	B-cells|Delta-Gamma	1	-0.182786
WNT5A_FZD5	B-cells|Delta-Gamma	1	-0.204233
WNT5A_ANTXR1	B-cells|Delta-Gamma	1	-0.236164
GDF11_ANTXR1	B-cells|Delta-Gamma	1	-0.0350469
WNT5A_FZD3	B-cells|Delta-Gamma	1	-0.217591
TNFRSF10A_TNFSF10	B-cells|Delta-Gamma	1	-0.2567
TNFRSF11B_TNFSF10	B-cells|Delta-Gamma	1	-0.184425
TNFRSF10B_TNFSF10	B-cells|Delta-Gamma	1	-0.2567
TNFRSF10C_TNFSF10	B-cells|Delta-Gamma	1	-0.2567
FGFR1_NCAM1	B-cells|Delta-Gamma	1	-0.295128
FGFR1_FGF9	B-cells|Delta-Gamma	1	-0.253257
FGFR3_FGF9	B-cells|Delta-Gamma	1	-0.145605
FGFR1_KL	B-cells|Delta-Gamma	1	-0.244685
FGFR2_EPHA4	B-cells|Delta-Gamma	1	-0.380822
EFNA1_EPHA4	B-cells|Delta-Gamma	1	-0.514573
EFNA4_EPHA4	B-cells|Delta-Gamma	1	-0.309359
EFNA5_EPHA4	B-cells|Delta-Gamma	1	-0.388355
EFNB2_EPHA4	B-cells|Delta-Gamma	1	-0.550043
FGFR3_EPHA4	B-cells|Delta-Gamma	1	-0.286304
FGFR2_NECTIN1	B-cells|Delta-Gamma	1	-0.32916
FGFR3_NECTIN1	B-cells|Delta-Gamma	1	-0.239566
FGFR2_XPR1	B-cells|Delta-Gamma	1	-0.107803
WNT4_SMO	B-cells|Delta-Gamma	1	-0.394032
WNT7B_FZD4	B-cells|Delta-Gamma	1	-0.272297
JAG1_NOTCH3	B-cells|Delta-Gamma	1	-0.275786
PLXNB2_PTN	B-cells|Delta-Gamma	1	-0.531156
PLXNB2_SEMA4D	B-cells|Delta-Gamma	1	-0.448115
PLXNB1_SEMA4D	B-cells|Delta-Gamma	1	-0.234465
CD72_SEMA4D	B-cells|Delta-Gamma	1	0.0989585
TNFSF10_TNFRSF10D	B-cells|Delta-Gamma	1	-0.148801
MIF_TNFRSF10D	B-cells|Delta-Gamma	1	-0.504305
EFNA1_EPHA1	B-cells|Delta-Gamma	1	-0.467932
EFNA1_EPHA2	B-cells|Delta-Gamma	1	-0.734563
EFNA1_EPHA5	B-cells|Delta-Gamma	1	-0.356606
EFNA4_EPHA5	B-cells|Delta-Gamma	1	-0.171368
EFNA5_EPHA5	B-cells|Delta-Gamma	1	-0.242977
CXCR6_CXCL16	B-cells|Delta-Gamma	1	-0.514573
EREG_EGFR	B-cells|Delta-Gamma	1	-0.253257
PLD2_ARF1	B-cells|Delta-Gamma	1	-0.436354
SEMA3E_PLXND1	B-cells|Delta-Gamma	1	0.190299
SEMA4A_PLXND1	B-cells|Delta-Gamma	1	0.041243
EPHB6_EFNB2	B-cells|Delta-Gamma	1	-0.50226
EPHB2_EFNB2	B-cells|Delta-Gamma	1	-0.413115
EPHB6_EFNB1	B-cells|Delta-Gamma	1	-0.341903
EPHB2_EFNB1	B-cells|Delta-Gamma	1	-0.261881
EPHB3_EFNB1	B-cells|Delta-Gamma	1	-0.364013
EPHB4_EFNB1	B-cells|Delta-Gamma	1	-0.295128
EPHA4_EFNB1	B-cells|Delta-Gamma	1	-0.403542
EFNB2_EPHB4	B-cells|Delta-Gamma	1	-0.430509
EPHB2_EFNA5	B-cells|Delta-Gamma	1	-0.226004
EPHA2_EFNA5	B-cells|Delta-Gamma	1	-0.579922
EFNB2_EPHB3	B-cells|Delta-Gamma	1	-0.504305
EPHA1_EFNA4	B-cells|Delta-Gamma	1	-0.249822
EPHA2_EFNA4	B-cells|Delta-Gamma	1	-0.531156
GPR37_PSAP	B-cells|Delta-Gamma	1	-0.652901
CSF1_SIRPA	B-cells|Delta-Gamma	1	-0.199255
CEACAM1_CEACAM8	B-cells|Delta-Gamma	1	-1.2109
VEGFA_EPHB2	B-cells|Delta-Gamma	1	-0.281036
FZD6_WNT5A	B-cells|Delta-Gamma	1	-0.234465
PLXNC1_SEMA7A	B-cells|Delta-Gamma	1	0.0271541
LRP6_CKLF	B-cells|Delta-Gamma	1	-0.0892673
COPA_P2RY6	B-cells|Delta-Gamma	1	-0.362158
NAMPT_P2RY6	B-cells|Delta-Gamma	1	-0.362158
ADORA3_ENTPD1	B-cells|Delta-Gamma	1	-0.117161
ANXA1_FPR1	B-cells|Delta-Gamma	1	-0.771027
ANXA1_FPR2	B-cells|Delta-Gamma	1	-0.78339
APP_FPR2	B-cells|Delta-Gamma	1	-0.537424
CSF1R_CSF1	B-cells|Delta-Gamma	1	-0.316528
CSF1R_CSF3	B-cells|Delta-Gamma	1	-0.311148
CSF1R_IL34	B-cells|Delta-Gamma	1	-0.244685
MET_HGF	B-cells|Delta-Gamma	1	-0.307573
CSF3_CSF3R	B-cells|Delta-Gamma	1	-0.186065
SELL_SELPLG	B-cells|Delta-Gamma	1	1.12168
SPN_SIGLEC1	B-cells|Delta-Gamma	1	0.00575927
FLT4_PDGFC	B-cells|Delta-Gamma	1	-0.176251
C5AR1_RPS19	B-cells|Delta-Gamma	1	0.169925
CXCR1_CXCL5	B-cells|Delta-Gamma	1	-0.307573
CXCR2_CXCL5	B-cells|Delta-Gamma	1	-0.307573
CXCR1_YARS	B-cells|Delta-Gamma	1	-0.15682
CXCR1_CXCL6	B-cells|Delta-Gamma	1	-0.307573
CXCR2_CXCL6	B-cells|Delta-Gamma	1	-0.307573
CD6_ALCAM	B-cells|Delta-Gamma	1	-0.456009
AXL_IL15RA	B-cells|Delta-Gamma	1	-0.362158
IL15_IL15RA	B-cells|Delta-Gamma	1	-0.281036
LTBR_LTB	B-cells|Delta-Gamma	1	0.72334
CX3CR1_CX3CL1	B-cells|Delta-Gamma	1	-0.341903
DSG2_DSC3	B-cells|Delta-Gamma	1	-0.360305
DSC2_DSG2	B-cells|Delta-Gamma	1	-0.378944
CXCL17_GPR35	B-cells|Delta-Gamma	1	-0.54372
KLRG2_WNT5B	B-cells|Endothelial	1	-0.192645
PVR_NECTIN3	B-cells|Endothelial	1	-0.00144342
CADM1_NECTIN3	B-cells|Endothelial	1	-0.0409718
NECTIN1_NECTIN3	B-cells|Endothelial	1	0.0717627
NECTIN2_NECTIN3	B-cells|Endothelial	1	-0.0619024
CADM1_CADM1	B-cells|Endothelial	1	-0.599462
NECTIN1_NECTIN4	B-cells|Endothelial	1	-0.37707
SPP1_CD44	B-cells|Endothelial	1	-0.275786
LGALS9_CD44	B-cells|Endothelial	1	-0.401635
HGF_CD44	B-cells|Endothelial	1	-0.187707
FGF1_FGFR1	B-cells|Endothelial	1	-0.123434
FGF1_FGFR2	B-cells|Endothelial	1	-0.456009
CD44_FGFR2	B-cells|Endothelial	1	-0.698998
TIMP1_FGFR2	B-cells|Endothelial	1	-0.360305
FGFR1_FGFR2	B-cells|Endothelial	1	-0.382702
FGF1_FGFR3	B-cells|Endothelial	1	-0.263612
FGFR2_FGFR3	B-cells|Endothelial	1	-0.176251
SPP1_PTGER4	B-cells|Endothelial	1	-0.32916
L1CAM_L1CAM	B-cells|Endothelial	1	-0.134477
LAMP1_FAM3C	B-cells|Endothelial	1	-1.07097
PDCD1_FAM3C	B-cells|Endothelial	1	-0.325539
PDCD1_CD274	B-cells|Endothelial	1	-0.0969617
CD80_CD274	B-cells|Endothelial	1	0.00575927
PDCD1_PDCD1LG2	B-cells|Endothelial	1	-0.150401
EGFR_TGFA	B-cells|Endothelial	1	-0.265345
EGFR_TGFB1	B-cells|Endothelial	1	-0.231075
EGFR_MIF	B-cells|Endothelial	1	-0.496142
CD74_MIF	B-cells|Endothelial	0.0009	1.0115
EGFR_AREG	B-cells|Endothelial	1	-0.349235
ICAM1_AREG	B-cells|Endothelial	1	-0.388355
EGFR_GRN	B-cells|Endothelial	1	-0.50226
TNFRSF1A_GRN	B-cells|Endothelial	1	-0.691989
TNFRSF1B_GRN	B-cells|Endothelial	1	-0.321928
EGFR_BTC	B-cells|Endothelial	1	-0.258425
ERBB3_BTC	B-cells|Endothelial	1	-0.279284
EGFR_COPA	B-cells|Endothelial	1	-0.226004
CD74_COPA	B-cells|Endothelial	0.0009	1.11237
EGFR_EPGN	B-cells|Endothelial	1	-0.275786
EGFR_HBEGF	B-cells|Endothelial	1	-0.473931
CD44_HBEGF	B-cells|Endothelial	1	-0.788365
TFRC_TNFSF13B	B-cells|Endothelial	1	-0.0634092
CD40_TNFSF13B	B-cells|Endothelial	1	0.288063
CD74_APP	B-cells|Endothelial	0.0009	1.21723
ICAM1_SPN	B-cells|Endothelial	1	-0.265345
ICAM1_ITGAL	B-cells|Endothelial	1	-0.318326
NRP1_VEGFA	B-cells|Endothelial	1	-0.21927
NRP2_VEGFA	B-cells|Endothelial	1	-0.166503
NRP1_VEGFB	B-cells|Endothelial	1	-0.327348
NRP2_SEMA3F	B-cells|Endothelial	1	-0.155213
NRP2_SEMA3C	B-cells|Endothelial	1	-0.314733
TNF_VSIR	B-cells|Endothelial	1	-0.312939
CCL3_IDE	B-cells|Endothelial	1	-0.291592
BDNF_SORT1	B-cells|Endothelial	1	0.0538064
GRN_SORT1	B-cells|Endothelial	1	-0.461959
COPA_SORT1	B-cells|Endothelial	1	-0.200913
BDNF_F11R	B-cells|Endothelial	1	-0.354759
TNF_DAG1	B-cells|Endothelial	1	-0.112475
LGALS9_DAG1	B-cells|Endothelial	1	-0.177882
TNF_NOTCH1	B-cells|Endothelial	1	-0.268817
TNF_SEMA4C	B-cells|Endothelial	1	0.558757
PLXNB2_SEMA4C	B-cells|Endothelial	1	0.493647
TNF_FLT4	B-cells|Endothelial	1	-0.2567
TNF_ICOS	B-cells|Endothelial	1	-0.21424
TNF_TNFRSF1A	B-cells|Endothelial	1	0.273814
TNF_FAS	B-cells|Endothelial	1	-0.0892673
TNF_TNFRSF1B	B-cells|Endothelial	1	-0.382702
TNF_RIPK1	B-cells|Endothelial	1	-0.12658
TNFSF10_RIPK1	B-cells|Endothelial	1	-0.114035
TNF_PTPRS	B-cells|Endothelial	1	-0.155213
PTN_PTPRS	B-cells|Endothelial	1	-0.129734
TNF_CELSR2	B-cells|Endothelial	1	-0.360305
NGFR_BDNF	B-cells|Endothelial	1	-0.0528949
NCAM1_BDNF	B-cells|Endothelial	1	-0.0679388
NGFR_NTF4	B-cells|Endothelial	1	-0.176251
NOTCH1_WNT4	B-cells|Endothelial	1	-0.367732
FZD6_WNT4	B-cells|Endothelial	1	-0.354759
NOTCH1_JAG1	B-cells|Endothelial	1	0.299831
CCL3L3_DPP4	B-cells|Endothelial	1	-0.305788
CXCL11_DPP4	B-cells|Endothelial	1	-0.234465
CXCL10_DPP4	B-cells|Endothelial	1	-0.41889
CXCL2_DPP4	B-cells|Endothelial	1	-0.450084
CXCL1_CXCR1	B-cells|Endothelial	1	-0.046921
CXCL2_CXCR1	B-cells|Endothelial	1	-0.205896
PPBP_CXCR1	B-cells|Endothelial	1	0.0200577
CXCL3_CXCR1	B-cells|Endothelial	1	-0.205896
CXCL1_CXCR2	B-cells|Endothelial	1	-0.046921
CXCL2_CXCR2	B-cells|Endothelial	1	-0.205896
PPBP_CXCR2	B-cells|Endothelial	1	0.0200577
CXCL3_CXCR2	B-cells|Endothelial	1	-0.205896
LGALS9_MET	B-cells|Endothelial	1	-0.463947
LGALS9_LRP1	B-cells|Endothelial	1	-0.367732
PDGFB_LRP1	B-cells|Endothelial	1	-0.21927
MDK_LRP1	B-cells|Endothelial	1	-0.229382
LGALS9_CD47	B-cells|Endothelial	1	-0.364013
SIRPA_CD47	B-cells|Endothelial	1	-0.16004
LGALS9_PTPRK	B-cells|Endothelial	1	-0.222633
WNT5A_PTPRK	B-cells|Endothelial	1	-0.0619024
LGALS9_COLEC12	B-cells|Endothelial	1	-0.086201
LGALS9_HAVCR2	B-cells|Endothelial	1	-0.360305
LGALS9_SORL1	B-cells|Endothelial	1	-0.588574
MDK_SORL1	B-cells|Endothelial	1	-0.428566
LGALS9_MRC2	B-cells|Endothelial	1	-0.351074
PDGFB_PDGFRB	B-cells|Endothelial	1	1.47405
PDGFB_ADGRV1	B-cells|Endothelial	1	-0.0603973
WNT4_FZD8	B-cells|Endothelial	1	-0.117161
WNT5A_FZD1	B-cells|Endothelial	1	-0.210897
WNT4_FZD1	B-cells|Endothelial	1	-0.330973
WNT7B_FZD1	B-cells|Endothelial	1	-0.330973
WNT5A_FZD2	B-cells|Endothelial	1	-0.182786
WNT5A_FZD5	B-cells|Endothelial	1	-0.204233
WNT5A_ANTXR1	B-cells|Endothelial	1	0.0840643
GDF11_ANTXR1	B-cells|Endothelial	1	0.24732
WNT5A_FZD3	B-cells|Endothelial	1	-0.177882
TNFRSF10A_TNFSF10	B-cells|Endothelial	1	-0.244685
TNFRSF11B_TNFSF10	B-cells|Endothelial	1	-0.174621
TNFRSF10B_TNFSF10	B-cells|Endothelial	1	-0.244685
TNFRSF10C_TNFSF10	B-cells|Endothelial	1	-0.244685
FGFR1_NCAM1	B-cells|Endothelial	1	-0.32916
FGFR1_FGF9	B-cells|Endothelial	1	-0.253257
FGFR3_FGF9	B-cells|Endothelial	1	-0.145605
FGFR1_KL	B-cells|Endothelial	1	-0.244685
FGFR2_EPHA4	B-cells|Endothelial	1	-0.277534
EFNA1_EPHA4	B-cells|Endothelial	1	-0.401635
EFNA4_EPHA4	B-cells|Endothelial	1	-0.210897
EFNA5_EPHA4	B-cells|Endothelial	1	-0.284546
EFNB2_EPHA4	B-cells|Endothelial	1	-0.434403
FGFR3_EPHA4	B-cells|Endothelial	1	-0.189351
FGFR2_NECTIN1	B-cells|Endothelial	1	-0.352916
FGFR3_NECTIN1	B-cells|Endothelial	1	-0.260152
FGFR2_XPR1	B-cells|Endothelial	1	-0.027675
WNT4_SMO	B-cells|Endothelial	1	-0.270556
WNT7B_FZD4	B-cells|Endothelial	1	-0.107803
JAG1_NOTCH3	B-cells|Endothelial	1	1.40654
PLXNB2_PTN	B-cells|Endothelial	1	-0.488026
PLXNB2_SEMA4D	B-cells|Endothelial	1	-0.352916
PLXNB1_SEMA4D	B-cells|Endothelial	1	-0.152003
CD72_SEMA4D	B-cells|Endothelial	1	0.164786
TNFSF10_TNFRSF10D	B-cells|Endothelial	1	-0.199255
MIF_TNFRSF10D	B-cells|Endothelial	1	-0.56918
EFNA1_EPHA1	B-cells|Endothelial	1	-0.21927
EFNA1_EPHA2	B-cells|Endothelial	1	-0.599462
EFNA1_EPHA5	B-cells|Endothelial	1	-0.356606
EFNA4_EPHA5	B-cells|Endothelial	1	-0.171368
EFNA5_EPHA5	B-cells|Endothelial	1	-0.242977
CXCR6_CXCL16	B-cells|Endothelial	1	-0.554273
EREG_EGFR	B-cells|Endothelial	1	-0.145605
PLD2_ARF1	B-cells|Endothelial	1	-0.107803
SEMA3E_PLXND1	B-cells|Endothelial	1	0.0854247
SEMA4A_PLXND1	B-cells|Endothelial	1	-0.07552
EPHB6_EFNB2	B-cells|Endothelial	1	-0.384584
EPHB2_EFNB2	B-cells|Endothelial	1	-0.302226
EPHB6_EFNB1	B-cells|Endothelial	1	0.0524159
EPHB2_EFNB1	B-cells|Endothelial	1	0.1137
EPHB3_EFNB1	B-cells|Endothelial	1	0.0370307
EPHB4_EFNB1	B-cells|Endothelial	1	0.0881416
EPHA4_EFNB1	B-cells|Endothelial	1	0.00575927
EFNB2_EPHB4	B-cells|Endothelial	1	-0.184425
EPHB2_EFNA5	B-cells|Endothelial	1	-0.22095
EPHA2_EFNA5	B-cells|Endothelial	1	-0.573467
EFNB2_EPHB3	B-cells|Endothelial	1	-0.459973
EPHA1_EFNA4	B-cells|Endothelial	1	-0.212568
EPHA2_EFNA4	B-cells|Endothelial	1	-0.483985
GPR37_PSAP	B-cells|Endothelial	1	-0.129734
CSF1_SIRPA	B-cells|Endothelial	1	-0.199255
CEACAM1_CEACAM8	B-cells|Endothelial	1	-1.22432
VEGFA_EPHB2	B-cells|Endothelial	1	-0.281036
FZD6_WNT5A	B-cells|Endothelial	1	-0.234465
PLXNC1_SEMA7A	B-cells|Endothelial	1	0.0271541
LRP6_CKLF	B-cells|Endothelial	1	-0.155213
COPA_P2RY6	B-cells|Endothelial	1	-0.291592
NAMPT_P2RY6	B-cells|Endothelial	1	-0.291592
ADORA3_ENTPD1	B-cells|Endothelial	1	-0.0573917
ANXA1_FPR1	B-cells|Endothelial	1	-0.771027
ANXA1_FPR2	B-cells|Endothelial	1	-0.78339
APP_FPR2	B-cells|Endothelial	1	-0.537424
CSF1R_CSF1	B-cells|Endothelial	1	-0.307573
CSF1R_CSF3	B-cells|Endothelial	1	-0.311148
CSF1R_IL34	B-cells|Endothelial	1	0.614474
MET_HGF	B-cells|Endothelial	1	-0.307573
CSF3_CSF3R	B-cells|Endothelial	1	-0.200913
SELL_SELPLG	B-cells|Endothelial	1	0.301002
SPN_SIGLEC1	B-cells|Endothelial	1	0.145351
FLT4_PDGFC	B-cells|Endothelial	1	-0.0709665
C5AR1_RPS19	B-cells|Endothelial	1	-0.234465
CXCR1_CXCL5	B-cells|Endothelial	1	-0.2567
CXCR2_CXCL5	B-cells|Endothelial	1	-0.2567
CXCR1_YARS	B-cells|Endothelial	1	-0.00578235
CXCR1_CXCL6	B-cells|Endothelial	1	-0.2567
CXCR2_CXCL6	B-cells|Endothelial	1	-0.2567
CD6_ALCAM	B-cells|Endothelial	1	-0.461959
AXL_IL15RA	B-cells|Endothelial	1	-0.302226
IL15_IL15RA	B-cells|Endothelial	1	-0.222633
LTBR_LTB	B-cells|Endothelial	1	-0.291592
CX3CR1_CX3CL1	B-cells|Endothelial	1	-0.349235
DSG2_DSC3	B-cells|Endothelial	1	-0.360305
DSC2_DSG2	B-cells|Endothelial	1	-0.33825
CXCL17_GPR35	B-cells|Endothelial	1	-0.456009
KLRG2_WNT5B	B-cells|Fibroblasts	1	-0.0262051
PVR_NECTIN3	B-cells|Fibroblasts	1	0.0426443
CADM1_NECTIN3	B-cells|Fibroblasts	1	0.00432161
NECTIN1_NECTIN3	B-cells|Fibroblasts	1	0.1137
NECTIN2_NECTIN3	B-cells|Fibroblasts	1	-0.0174171
CADM1_CADM1	B-cells|Fibroblasts	1	-0.567041
NECTIN1_NECTIN4	B-cells|Fibroblasts	1	-0.358454
SPP1_CD44	B-cells|Fibroblasts	1	-0.403542
LGALS9_CD44	B-cells|Fibroblasts	1	-0.54372
HGF_CD44	B-cells|Fibroblasts	1	-0.309359
FGF1_FGFR1	B-cells|Fibroblasts	1	0.659925
FGF1_FGFR2	B-cells|Fibroblasts	1	-0.384584
CD44_FGFR2	B-cells|Fibroblasts	1	-0.612637
TIMP1_FGFR2	B-cells|Fibroblasts	1	-0.293359
FGFR1_FGFR2	B-cells|Fibroblasts	1	-0.312939
FGF1_FGFR3	B-cells|Fibroblasts	1	-0.296899
FGFR2_FGFR3	B-cells|Fibroblasts	1	-0.209228
SPP1_PTGER4	B-cells|Fibroblasts	1	-0.217591
L1CAM_L1CAM	B-cells|Fibroblasts	1	-0.077041
LAMP1_FAM3C	B-cells|Fibroblasts	1	-0.703689
PDCD1_FAM3C	B-cells|Fibroblasts	1	-0.093879
PDCD1_CD274	B-cells|Fibroblasts	1	-0.0985055
CD80_CD274	B-cells|Fibroblasts	1	0.00575927
PDCD1_PDCD1LG2	B-cells|Fibroblasts	1	-0.121863
EGFR_TGFA	B-cells|Fibroblasts	1	-0.32916
EGFR_TGFB1	B-cells|Fibroblasts	1	0.0496308
EGFR_MIF	B-cells|Fibroblasts	1	-0.720232
CD74_MIF	B-cells|Fibroblasts	0.0009	0.936591
EGFR_AREG	B-cells|Fibroblasts	1	-0.45799
ICAM1_AREG	B-cells|Fibroblasts	1	-0.500218
EGFR_GRN	B-cells|Fibroblasts	1	-0.272297
TNFRSF1A_GRN	B-cells|Fibroblasts	1	-0.432455
TNFRSF1B_GRN	B-cells|Fibroblasts	1	-0.118727
EGFR_BTC	B-cells|Fibroblasts	1	-0.268817
ERBB3_BTC	B-cells|Fibroblasts	1	-0.289827
EGFR_COPA	B-cells|Fibroblasts	1	-0.137648
CD74_COPA	B-cells|Fibroblasts	0.0009	1.14796
EGFR_EPGN	B-cells|Fibroblasts	1	-0.275786
EGFR_HBEGF	B-cells|Fibroblasts	1	-0.492079
CD44_HBEGF	B-cells|Fibroblasts	1	-0.808437
TFRC_TNFSF13B	B-cells|Fibroblasts	1	0.151859
CD40_TNFSF13B	B-cells|Fibroblasts	1	0.459432
CD74_APP	B-cells|Fibroblasts	0.0009	1.32884
ICAM1_SPN	B-cells|Fibroblasts	1	-0.305788
ICAM1_ITGAL	B-cells|Fibroblasts	1	-0.305788
NRP1_VEGFA	B-cells|Fibroblasts	1	0.0384362
NRP2_VEGFA	B-cells|Fibroblasts	1	0.0827026
NRP1_VEGFB	B-cells|Fibroblasts	1	0
NRP2_SEMA3F	B-cells|Fibroblasts	1	-0.192645
NRP2_SEMA3C	B-cells|Fibroblasts	1	-0.00433459
TNF_VSIR	B-cells|Fibroblasts	1	-0.0291463
CCL3_IDE	B-cells|Fibroblasts	1	-0.268817
BDNF_SORT1	B-cells|Fibroblasts	1	-0.109359
GRN_SORT1	B-cells|Fibroblasts	1	-0.703689
COPA_SORT1	B-cells|Fibroblasts	1	-0.397828
BDNF_F11R	B-cells|Fibroblasts	1	-0.321928
TNF_DAG1	B-cells|Fibroblasts	1	-0.0262051
LGALS9_DAG1	B-cells|Fibroblasts	1	-0.0892673
TNF_NOTCH1	B-cells|Fibroblasts	1	-0.332789
TNF_SEMA4C	B-cells|Fibroblasts	1	-0.0619024
PLXNB2_SEMA4C	B-cells|Fibroblasts	1	-0.164884
TNF_FLT4	B-cells|Fibroblasts	1	-0.21927
TNF_ICOS	B-cells|Fibroblasts	1	-0.272297
TNF_TNFRSF1A	B-cells|Fibroblasts	1	0.0745054
TNF_FAS	B-cells|Fibroblasts	1	-0.118727
TNF_TNFRSF1B	B-cells|Fibroblasts	1	-0.281036
TNF_RIPK1	B-cells|Fibroblasts	1	-0.12658
TNFSF10_RIPK1	B-cells|Fibroblasts	1	-0.112475
TNF_PTPRS	B-cells|Fibroblasts	1	0.0935602
PTN_PTPRS	B-cells|Fibroblasts	1	0.115033
TNF_CELSR2	B-cells|Fibroblasts	1	-0.334607
NGFR_BDNF	B-cells|Fibroblasts	1	0.145351
NCAM1_BDNF	B-cells|Fibroblasts	1	0.130931
NGFR_NTF4	B-cells|Fibroblasts	1	-0.158429
NOTCH1_WNT4	B-cells|Fibroblasts	1	-0.321928
FZD6_WNT4	B-cells|Fibroblasts	1	-0.309359
NOTCH1_JAG1	B-cells|Fibroblasts	1	-0.166503
CCL3L3_DPP4	B-cells|Fibroblasts	1	0.0496308
CXCL11_DPP4	B-cells|Fibroblasts	1	0.107018
CXCL10_DPP4	B-cells|Fibroblasts	1	-0.0365259
CXCL2_DPP4	B-cells|Fibroblasts	1	-0.0603973
CXCL1_CXCR1	B-cells|Fibroblasts	1	-0.152003
CXCL2_CXCR1	B-cells|Fibroblasts	1	-0.321928
PPBP_CXCR1	B-cells|Fibroblasts	1	-0.0785637
CXCL3_CXCR1	B-cells|Fibroblasts	1	-0.321928
CXCL1_CXCR2	B-cells|Fibroblasts	1	-0.152003
CXCL2_CXCR2	B-cells|Fibroblasts	1	-0.321928
PPBP_CXCR2	B-cells|Fibroblasts	1	-0.0785637
CXCL3_CXCR2	B-cells|Fibroblasts	1	-0.321928
LGALS9_MET	B-cells|Fibroblasts	1	-0.518701
LGALS9_LRP1	B-cells|Fibroblasts	1	0.83754
PDGFB_LRP1	B-cells|Fibroblasts	1	0.90381
MDK_LRP1	B-cells|Fibroblasts	1	0.899176
LGALS9_CD47	B-cells|Fibroblasts	1	0.102994
SIRPA_CD47	B-cells|Fibroblasts	1	0.254594
LGALS9_PTPRK	B-cells|Fibroblasts	1	-0.486004
WNT5A_PTPRK	B-cells|Fibroblasts	1	-0.295128
LGALS9_COLEC12	B-cells|Fibroblasts	1	0.77484
LGALS9_HAVCR2	B-cells|Fibroblasts	1	-0.343732
LGALS9_SORL1	B-cells|Fibroblasts	1	-0.634867
MDK_SORL1	B-cells|Fibroblasts	1	-0.469929
LGALS9_MRC2	B-cells|Fibroblasts	1	0.655352
PDGFB_PDGFRB	B-cells|Fibroblasts	1	0.597412
PDGFB_ADGRV1	B-cells|Fibroblasts	1	-0.137648
WNT4_FZD8	B-cells|Fibroblasts	1	-0.145605
WNT5A_FZD1	B-cells|Fibroblasts	1	0.922959
WNT4_FZD1	B-cells|Fibroblasts	1	0.868687
WNT7B_FZD1	B-cells|Fibroblasts	1	0.868687
WNT5A_FZD2	B-cells|Fibroblasts	1	0.555816
WNT5A_FZD5	B-cells|Fibroblasts	1	-0.194295
WNT5A_ANTXR1	B-cells|Fibroblasts	1	0.399445
GDF11_ANTXR1	B-cells|Fibroblasts	1	0.531069
WNT5A_FZD3	B-cells|Fibroblasts	1	-0.0923402
TNFRSF10A_TNFSF10	B-cells|Fibroblasts	1	-0.254978
TNFRSF11B_TNFSF10	B-cells|Fibroblasts	1	-0.184425
TNFRSF10B_TNFSF10	B-cells|Fibroblasts	1	-0.254978
TNFRSF10C_TNFSF10	B-cells|Fibroblasts	1	-0.254978
FGFR1_NCAM1	B-cells|Fibroblasts	1	0.233888
FGFR1_FGF9	B-cells|Fibroblasts	1	0.455229
FGFR3_FGF9	B-cells|Fibroblasts	1	0.521051
FGFR1_KL	B-cells|Fibroblasts	1	-0.21424
FGFR2_EPHA4	B-cells|Fibroblasts	1	-0.293359
EFNA1_EPHA4	B-cells|Fibroblasts	1	-0.41889
EFNA4_EPHA4	B-cells|Fibroblasts	1	-0.226004
EFNA5_EPHA4	B-cells|Fibroblasts	1	-0.302226
EFNB2_EPHA4	B-cells|Fibroblasts	1	-0.454032
FGFR3_EPHA4	B-cells|Fibroblasts	1	-0.205896
FGFR2_NECTIN1	B-cells|Fibroblasts	1	-0.239566
FGFR3_NECTIN1	B-cells|Fibroblasts	1	-0.153607
FGFR2_XPR1	B-cells|Fibroblasts	1	-0.177882
WNT4_SMO	B-cells|Fibroblasts	1	-0.0320936
WNT7B_FZD4	B-cells|Fibroblasts	1	-0.21424
JAG1_NOTCH3	B-cells|Fibroblasts	1	-0.199255
PLXNB2_PTN	B-cells|Fibroblasts	1	0.0949116
PLXNB2_SEMA4D	B-cells|Fibroblasts	1	-0.467932
PLXNB1_SEMA4D	B-cells|Fibroblasts	1	-0.251539
CD72_SEMA4D	B-cells|Fibroblasts	1	0.0854247
TNFSF10_TNFRSF10D	B-cells|Fibroblasts	1	-0.177882
MIF_TNFRSF10D	B-cells|Fibroblasts	1	-0.541618
EFNA1_EPHA1	B-cells|Fibroblasts	1	-0.314733
EFNA1_EPHA2	B-cells|Fibroblasts	1	-0.652901
EFNA1_EPHA5	B-cells|Fibroblasts	1	-0.274041
EFNA4_EPHA5	B-cells|Fibroblasts	1	-0.0985055
EFNA5_EPHA5	B-cells|Fibroblasts	1	-0.166503
CXCR6_CXCL16	B-cells|Fibroblasts	1	-0.360305
EREG_EGFR	B-cells|Fibroblasts	1	0.0867838
PLD2_ARF1	B-cells|Fibroblasts	1	-0.295128
SEMA3E_PLXND1	B-cells|Fibroblasts	1	-0.0573917
SEMA4A_PLXND1	B-cells|Fibroblasts	1	-0.234465
EPHB6_EFNB2	B-cells|Fibroblasts	1	-0.446148
EPHB2_EFNB2	B-cells|Fibroblasts	1	-0.360305
EPHB6_EFNB1	B-cells|Fibroblasts	1	-0.0923402
EPHB2_EFNB1	B-cells|Fibroblasts	1	-0.0262051
EPHB3_EFNB1	B-cells|Fibroblasts	1	-0.110916
EPHB4_EFNB1	B-cells|Fibroblasts	1	-0.0528949
EPHA4_EFNB1	B-cells|Fibroblasts	1	-0.145605
EFNB2_EPHB4	B-cells|Fibroblasts	1	-0.093879
EPHB2_EFNA5	B-cells|Fibroblasts	1	0.0662614
EPHA2_EFNA5	B-cells|Fibroblasts	1	-0.217591
EFNB2_EPHB3	B-cells|Fibroblasts	1	-0.349235
EPHA1_EFNA4	B-cells|Fibroblasts	1	-0.179515
EPHA2_EFNA4	B-cells|Fibroblasts	1	-0.446148
GPR37_PSAP	B-cells|Fibroblasts	1	0.14274
CSF1_SIRPA	B-cells|Fibroblasts	1	-0.190997
CEACAM1_CEACAM8	B-cells|Fibroblasts	1	-1.13924
VEGFA_EPHB2	B-cells|Fibroblasts	1	-0.077041
FZD6_WNT5A	B-cells|Fibroblasts	1	0.0854247
PLXNC1_SEMA7A	B-cells|Fibroblasts	1	0.0551957
LRP6_CKLF	B-cells|Fibroblasts	1	-0.21927
COPA_P2RY6	B-cells|Fibroblasts	1	-0.312939
NAMPT_P2RY6	B-cells|Fibroblasts	1	-0.312939
ADORA3_ENTPD1	B-cells|Fibroblasts	1	-0.0831412
ANXA1_FPR1	B-cells|Fibroblasts	1	-0.75877
ANXA1_FPR2	B-cells|Fibroblasts	1	-0.753896
APP_FPR2	B-cells|Fibroblasts	1	-0.510457
CSF1R_CSF1	B-cells|Fibroblasts	1	0.199123
CSF1R_CSF3	B-cells|Fibroblasts	1	-0.300448
CSF1R_IL34	B-cells|Fibroblasts	1	0.412511
MET_HGF	B-cells|Fibroblasts	1	-0.16004
CSF3_CSF3R	B-cells|Fibroblasts	1	-0.16004
SELL_SELPLG	B-cells|Fibroblasts	1	0.290424
SPN_SIGLEC1	B-cells|Fibroblasts	1	-0.086201
FLT4_PDGFC	B-cells|Fibroblasts	1	-0.0262051
C5AR1_RPS19	B-cells|Fibroblasts	1	-0.0499049
CXCR1_CXCL5	B-cells|Fibroblasts	1	-0.265345
CXCR2_CXCL5	B-cells|Fibroblasts	1	-0.265345
CXCR1_YARS	B-cells|Fibroblasts	1	-0.027675
CXCR1_CXCL6	B-cells|Fibroblasts	1	-0.265345
CXCR2_CXCL6	B-cells|Fibroblasts	1	-0.265345
CD6_ALCAM	B-cells|Fibroblasts	1	-0.12658
AXL_IL15RA	B-cells|Fibroblasts	1	-0.172994
IL15_IL15RA	B-cells|Fibroblasts	1	-0.101598
LTBR_LTB	B-cells|Fibroblasts	1	-0.321928
CX3CR1_CX3CL1	B-cells|Fibroblasts	1	0.102994
DSG2_DSC3	B-cells|Fibroblasts	1	-0.343732
DSC2_DSG2	B-cells|Fibroblasts	1	-0.352916
CXCL17_GPR35	B-cells|Fibroblasts	1	-0.518701
KLRG2_WNT5B	B-cells|M2	1	-0.192645
PVR_NECTIN3	B-cells|M2	1	-0.360305
CADM1_NECTIN3	B-cells|M2	1	-0.411195
NECTIN1_NECTIN3	B-cells|M2	1	-0.26708
NECTIN2_NECTIN3	B-cells|M2	1	-0.440263
CADM1_CADM1	B-cells|M2	1	-0.696658
NECTIN1_NECTIN4	B-cells|M2	1	-0.37707
SPP1_CD44	B-cells|M2	1	-0.592919
LGALS9_CD44	B-cells|M2	1	-0.753896
HGF_CD44	B-cells|M2	1	-0.483985
FGF1_FGFR1	B-cells|M2	1	-0.0174171
FGF1_FGFR2	B-cells|M2	1	-0.456009
CD44_FGFR2	B-cells|M2	1	-0.698998
TIMP1_FGFR2	B-cells|M2	1	-0.360305
FGFR1_FGFR2	B-cells|M2	1	-0.382702
FGF1_FGFR3	B-cells|M2	1	-0.365871
FGFR2_FGFR3	B-cells|M2	1	-0.272297
SPP1_PTGER4	B-cells|M2	1	-0.16004
L1CAM_L1CAM	B-cells|M2	1	-0.0291463
LAMP1_FAM3C	B-cells|M2	1	-0.833927
PDCD1_FAM3C	B-cells|M2	1	-0.179515
PDCD1_CD274	B-cells|M2	1	0.0690147
CD80_CD274	B-cells|M2	1	0.16092
PDCD1_PDCD1LG2	B-cells|M2	1	-0.150401
EGFR_TGFA	B-cells|M2	1	-0.360305
EGFR_TGFB1	B-cells|M2	1	0.147958
EGFR_MIF	B-cells|M2	1	-0.846843
CD74_MIF	B-cells|M2	0.0009	0.897628
EGFR_AREG	B-cells|M2	1	-0.475936
ICAM1_AREG	B-cells|M2	1	-0.518701
EGFR_GRN	B-cells|M2	1	0.662661
TNFRSF1A_GRN	B-cells|M2	1	0.58111
TNFRSF1B_GRN	B-cells|M2	1	0.745883
EGFR_BTC	B-cells|M2	1	-0.351074
ERBB3_BTC	B-cells|M2	1	-0.373327
EGFR_COPA	B-cells|M2	1	-0.258425
CD74_COPA	B-cells|M2	0.0009	1.09963
EGFR_EPGN	B-cells|M2	1	-0.275786
EGFR_HBEGF	B-cells|M2	1	-0.68966
CD44_HBEGF	B-cells|M2	1	-1.0619
TFRC_TNFSF13B	B-cells|M2	1	-0.164884
CD40_TNFSF13B	B-cells|M2	1	0.210389
CD74_APP	B-cells|M2	0.0009	1.1884
ICAM1_SPN	B-cells|M2	1	-0.205896
ICAM1_ITGAL	B-cells|M2	1	-0.318326
NRP1_VEGFA	B-cells|M2	1	-0.320126
NRP2_VEGFA	B-cells|M2	1	-0.263612
NRP1_VEGFB	B-cells|M2	1	-0.169745
NRP2_SEMA3F	B-cells|M2	1	-0.209228
NRP2_SEMA3C	B-cells|M2	1	-0.341903
TNF_VSIR	B-cells|M2	1	0.423309
CCL3_IDE	B-cells|M2	1	-0.341903
BDNF_SORT1	B-cells|M2	1	-0.103147
GRN_SORT1	B-cells|M2	1	-0.694321
COPA_SORT1	B-cells|M2	1	-0.390245
BDNF_F11R	B-cells|M2	1	-0.39973
TNF_DAG1	B-cells|M2	1	-0.413115
LGALS9_DAG1	B-cells|M2	1	-0.496142
TNF_NOTCH1	B-cells|M2	1	-0.109359
TNF_SEMA4C	B-cells|M2	1	-0.174621
PLXNB2_SEMA4C	B-cells|M2	1	-0.284546
TNF_FLT4	B-cells|M2	1	-0.14401
TNF_ICOS	B-cells|M2	1	-0.300448
TNF_TNFRSF1A	B-cells|M2	1	0.0200577
TNF_FAS	B-cells|M2	1	-0.239566
TNF_TNFRSF1B	B-cells|M2	1	0.175045
TNF_RIPK1	B-cells|M2	1	-0.106249
TNFSF10_RIPK1	B-cells|M2	1	-0.093879
TNF_PTPRS	B-cells|M2	1	-0.37146
PTN_PTPRS	B-cells|M2	1	-0.341903
TNF_CELSR2	B-cells|M2	1	-0.394032
NGFR_BDNF	B-cells|M2	1	-0.0499049
NCAM1_BDNF	B-cells|M2	1	-0.0664274
NGFR_NTF4	B-cells|M2	1	-0.212568
NOTCH1_WNT4	B-cells|M2	1	-0.316528
FZD6_WNT4	B-cells|M2	1	-0.304006
NOTCH1_JAG1	B-cells|M2	1	-0.21424
CCL3L3_DPP4	B-cells|M2	1	-0.305788
CXCL11_DPP4	B-cells|M2	1	-0.234465
CXCL10_DPP4	B-cells|M2	1	-0.41889
CXCL2_DPP4	B-cells|M2	1	-0.450084
CXCL1_CXCR1	B-cells|M2	1	-0.132894
CXCL2_CXCR1	B-cells|M2	1	-0.300448
PPBP_CXCR1	B-cells|M2	1	-0.0603973
CXCL3_CXCR1	B-cells|M2	1	-0.300448
CXCL1_CXCR2	B-cells|M2	1	-0.132894
CXCL2_CXCR2	B-cells|M2	1	-0.300448
PPBP_CXCR2	B-cells|M2	1	-0.0603973
CXCL3_CXCR2	B-cells|M2	1	-0.300448
LGALS9_MET	B-cells|M2	1	-0.550043
LGALS9_LRP1	B-cells|M2	1	-0.120294
PDGFB_LRP1	B-cells|M2	1	0.0071955
MDK_LRP1	B-cells|M2	1	-0.00288828
LGALS9_CD47	B-cells|M2	1	0.00144197
SIRPA_CD47	B-cells|M2	1	0.163499
LGALS9_PTPRK	B-cells|M2	1	-0.533242
WNT5A_PTPRK	B-cells|M2	1	-0.336428
LGALS9_COLEC12	B-cells|M2	1	-0.388355
LGALS9_HAVCR2	B-cells|M2	1	-0.168123
LGALS9_SORL1	B-cells|M2	1	-0.54372
MDK_SORL1	B-cells|M2	1	-0.388355
LGALS9_MRC2	B-cells|M2	1	-0.351074
PDGFB_PDGFRB	B-cells|M2	1	-0.212568
PDGFB_ADGRV1	B-cells|M2	1	-0.086201
WNT4_FZD8	B-cells|M2	1	-0.28279
WNT5A_FZD1	B-cells|M2	1	-0.270556
WNT4_FZD1	B-cells|M2	1	-0.395929
WNT7B_FZD1	B-cells|M2	1	-0.397828
WNT5A_FZD2	B-cells|M2	1	-0.182786
WNT5A_FZD5	B-cells|M2	1	-0.242977
WNT5A_ANTXR1	B-cells|M2	1	-0.0846703
GDF11_ANTXR1	B-cells|M2	1	0.0962619
WNT5A_FZD3	B-cells|M2	1	-0.217591
TNFRSF10A_TNFSF10	B-cells|M2	1	-0.277534
TNFRSF11B_TNFSF10	B-cells|M2	1	-0.204233
TNFRSF10B_TNFSF10	B-cells|M2	1	-0.277534
TNFRSF10C_TNFSF10	B-cells|M2	1	-0.277534
FGFR1_NCAM1	B-cells|M2	1	-0.32916
FGFR1_FGF9	B-cells|M2	1	-0.140826
FGFR3_FGF9	B-cells|M2	1	-0.0409718
FGFR1_KL	B-cells|M2	1	-0.244685
FGFR2_EPHA4	B-cells|M2	1	-0.316528
EFNA1_EPHA4	B-cells|M2	1	-0.444184
EFNA4_EPHA4	B-cells|M2	1	-0.248108
EFNA5_EPHA4	B-cells|M2	1	-0.323733
EFNB2_EPHA4	B-cells|M2	1	-0.477944
FGFR3_EPHA4	B-cells|M2	1	-0.226004
FGFR2_NECTIN1	B-cells|M2	1	-0.362158
FGFR3_NECTIN1	B-cells|M2	1	-0.268817
FGFR2_XPR1	B-cells|M2	1	0.051024
WNT4_SMO	B-cells|M2	1	-0.356606
WNT7B_FZD4	B-cells|M2	1	-0.325539
JAG1_NOTCH3	B-cells|M2	1	-0.37146
PLXNB2_PTN	B-cells|M2	1	-0.469929
PLXNB2_SEMA4D	B-cells|M2	1	-0.42082
PLXNB1_SEMA4D	B-cells|M2	1	-0.210897
CD72_SEMA4D	B-cells|M2	1	0.117695
TNFSF10_TNFRSF10D	B-cells|M2	1	-0.148801
MIF_TNFRSF10D	B-cells|M2	1	-0.504305
EFNA1_EPHA1	B-cells|M2	1	-0.467932
EFNA1_EPHA2	B-cells|M2	1	-0.701342
EFNA1_EPHA5	B-cells|M2	1	-0.236164
EFNA4_EPHA5	B-cells|M2	1	-0.0634092
EFNA5_EPHA5	B-cells|M2	1	-0.131313
CXCR6_CXCL16	B-cells|M2	1	0.0976108
EREG_EGFR	B-cells|M2	1	-0.172994
PLD2_ARF1	B-cells|M2	1	-0.488026
SEMA3E_PLXND1	B-cells|M2	1	0.284514
SEMA4A_PLXND1	B-cells|M2	1	0.145351
EPHB6_EFNB2	B-cells|M2	1	-0.356606
EPHB2_EFNB2	B-cells|M2	1	-0.275786
EPHB6_EFNB1	B-cells|M2	1	-0.341903
EPHB2_EFNB1	B-cells|M2	1	-0.261881
EPHB3_EFNB1	B-cells|M2	1	-0.362158
EPHB4_EFNB1	B-cells|M2	1	-0.293359
EPHA4_EFNB1	B-cells|M2	1	-0.403542
EFNB2_EPHB4	B-cells|M2	1	-0.430509
EPHB2_EFNA5	B-cells|M2	1	-0.248108
EPHA2_EFNA5	B-cells|M2	1	-0.608232
EFNB2_EPHB3	B-cells|M2	1	-0.422752
EPHA1_EFNA4	B-cells|M2	1	-0.0892673
EPHA2_EFNA4	B-cells|M2	1	-0.336428
GPR37_PSAP	B-cells|M2	1	0.592636
CSF1_SIRPA	B-cells|M2	1	-0.199255
CEACAM1_CEACAM8	B-cells|M2	1	-1.09542
VEGFA_EPHB2	B-cells|M2	1	-0.281036
FZD6_WNT5A	B-cells|M2	1	-0.234465
PLXNC1_SEMA7A	B-cells|M2	1	0.0271541
LRP6_CKLF	B-cells|M2	1	0.0482362
COPA_P2RY6	B-cells|M2	1	0.519039
NAMPT_P2RY6	B-cells|M2	1	0.519039
ADORA3_ENTPD1	B-cells|M2	1	0.183963
ANXA1_FPR1	B-cells|M2	1	-0.50226
ANXA1_FPR2	B-cells|M2	1	-0.675765
APP_FPR2	B-cells|M2	1	-0.446148
CSF1R_CSF1	B-cells|M2	1	-0.318326
CSF1R_CSF3	B-cells|M2	1	-0.311148
CSF1R_IL34	B-cells|M2	1	-0.244685
MET_HGF	B-cells|M2	1	-0.190997
CSF3_CSF3R	B-cells|M2	1	0.0703893
SELL_SELPLG	B-cells|M2	1	0.499782
SPN_SIGLEC1	B-cells|M2	1	0.104337
FLT4_PDGFC	B-cells|M2	1	0.146655
C5AR1_RPS19	B-cells|M2	1	-0.599462
CXCR1_CXCL5	B-cells|M2	1	-0.279284
CXCR2_CXCL5	B-cells|M2	1	-0.279284
CXCR1_YARS	B-cells|M2	1	0.0440443
CXCR1_CXCL6	B-cells|M2	1	-0.279284
CXCR2_CXCL6	B-cells|M2	1	-0.279284
CD6_ALCAM	B-cells|M2	1	-0.352916
AXL_IL15RA	B-cells|M2	1	-0.362158
IL15_IL15RA	B-cells|M2	1	-0.281036
LTBR_LTB	B-cells|M2	1	-0.375197
CX3CR1_CX3CL1	B-cells|M2	1	-0.347399
DSG2_DSC3	B-cells|M2	1	-0.246395
DSC2_DSG2	B-cells|M2	1	-0.330973
CXCL17_GPR35	B-cells|M2	1	-0.217591
KLRG2_WNT5B	B-cells|MDSC	1	-0.182786
PVR_NECTIN3	B-cells|MDSC	1	-0.349235
CADM1_NECTIN3	B-cells|MDSC	1	-0.39973
NECTIN1_NECTIN3	B-cells|MDSC	1	-0.258425
NECTIN2_NECTIN3	B-cells|MDSC	1	-0.428566
CADM1_CADM1	B-cells|MDSC	1	-0.68966
NECTIN1_NECTIN4	B-cells|MDSC	1	-0.341903
SPP1_CD44	B-cells|MDSC	1	0.197865
LGALS9_CD44	B-cells|MDSC	1	0.107018
HGF_CD44	B-cells|MDSC	1	0.260628
FGF1_FGFR1	B-cells|MDSC	1	-0.459973
FGF1_FGFR2	B-cells|MDSC	1	-0.450084
CD44_FGFR2	B-cells|MDSC	1	-0.68966
TIMP1_FGFR2	B-cells|MDSC	1	-0.354759
FGFR1_FGFR2	B-cells|MDSC	1	-0.375197
FGF1_FGFR3	B-cells|MDSC	1	-0.354759
FGFR2_FGFR3	B-cells|MDSC	1	-0.261881
SPP1_PTGER4	B-cells|MDSC	1	-0.327348
L1CAM_L1CAM	B-cells|MDSC	1	-0.103147
LAMP1_FAM3C	B-cells|MDSC	1	-1.19429
PDCD1_FAM3C	B-cells|MDSC	1	-0.397828
PDCD1_CD274	B-cells|MDSC	1	0.752749
CD80_CD274	B-cells|MDSC	1	0.810649
PDCD1_PDCD1LG2	B-cells|MDSC	1	0.506907
EGFR_TGFA	B-cells|MDSC	1	-0.340075
EGFR_TGFB1	B-cells|MDSC	1	-0.155213
EGFR_MIF	B-cells|MDSC	1	-0.152003
CD74_MIF	B-cells|MDSC	0.0009	1.14209
EGFR_AREG	B-cells|MDSC	1	-0.473931
ICAM1_AREG	B-cells|MDSC	1	-0.516636
EGFR_GRN	B-cells|MDSC	1	-0.444184
TNFRSF1A_GRN	B-cells|MDSC	1	-0.625934
TNFRSF1B_GRN	B-cells|MDSC	1	-0.270556
EGFR_BTC	B-cells|MDSC	1	-0.327348
ERBB3_BTC	B-cells|MDSC	1	-0.349235
EGFR_COPA	B-cells|MDSC	1	-0.54372
CD74_COPA	B-cells|MDSC	1	0.994942
EGFR_EPGN	B-cells|MDSC	1	-0.275786
EGFR_HBEGF	B-cells|MDSC	1	-1.08009
CD44_HBEGF	B-cells|MDSC	1	-1.59074
TFRC_TNFSF13B	B-cells|MDSC	1	-0.226004
CD40_TNFSF13B	B-cells|MDSC	1	0.16221
CD74_APP	B-cells|MDSC	1	0.961994
ICAM1_SPN	B-cells|MDSC	1	-0.237864
ICAM1_ITGAL	B-cells|MDSC	1	-0.0499049
NRP1_VEGFA	B-cells|MDSC	1	-0.0954196
NRP2_VEGFA	B-cells|MDSC	1	-0.046921
NRP1_VEGFB	B-cells|MDSC	1	-0.321928
NRP2_SEMA3F	B-cells|MDSC	1	-0.195946
NRP2_SEMA3C	B-cells|MDSC	1	-0.334607
TNF_VSIR	B-cells|MDSC	1	0.132248
CCL3_IDE	B-cells|MDSC	1	-0.384584
BDNF_SORT1	B-cells|MDSC	1	-0.142417
GRN_SORT1	B-cells|MDSC	1	-0.753896
COPA_SORT1	B-cells|MDSC	1	-0.438307
BDNF_F11R	B-cells|MDSC	1	-0.403542
TNF_DAG1	B-cells|MDSC	1	-0.608232
LGALS9_DAG1	B-cells|MDSC	1	-0.703689
TNF_NOTCH1	B-cells|MDSC	1	-0.430509
TNF_SEMA4C	B-cells|MDSC	1	-0.279284
PLXNB2_SEMA4C	B-cells|MDSC	1	-0.39973
TNF_FLT4	B-cells|MDSC	1	-0.251539
TNF_ICOS	B-cells|MDSC	1	-0.270556
TNF_TNFRSF1A	B-cells|MDSC	1	-0.107803
TNF_FAS	B-cells|MDSC	1	0.244887
TNF_TNFRSF1B	B-cells|MDSC	1	0.633199
TNF_RIPK1	B-cells|MDSC	1	-0.367732
TNFSF10_RIPK1	B-cells|MDSC	1	-0.351074
TNF_PTPRS	B-cells|MDSC	1	-0.422752
PTN_PTPRS	B-cells|MDSC	1	-0.392137
TNF_CELSR2	B-cells|MDSC	1	-0.394032
NGFR_BDNF	B-cells|MDSC	1	-0.137648
NCAM1_BDNF	B-cells|MDSC	1	-0.155213
NGFR_NTF4	B-cells|MDSC	1	-0.195946
NOTCH1_WNT4	B-cells|MDSC	1	-0.330973
FZD6_WNT4	B-cells|MDSC	1	-0.318326
NOTCH1_JAG1	B-cells|MDSC	1	-0.327348
CCL3L3_DPP4	B-cells|MDSC	1	-0.293359
CXCL11_DPP4	B-cells|MDSC	1	-0.222633
CXCL10_DPP4	B-cells|MDSC	1	-0.403542
CXCL2_DPP4	B-cells|MDSC	1	-0.436354
CXCL1_CXCR1	B-cells|MDSC	1	0.183963
CXCL2_CXCR1	B-cells|MDSC	1	0.051024
PPBP_CXCR1	B-cells|MDSC	1	0.24123
CXCL3_CXCR1	B-cells|MDSC	1	0.051024
CXCL1_CXCR2	B-cells|MDSC	1	0.183963
CXCL2_CXCR2	B-cells|MDSC	1	0.051024
PPBP_CXCR2	B-cells|MDSC	1	0.24123
CXCL3_CXCR2	B-cells|MDSC	1	0.051024
LGALS9_MET	B-cells|MDSC	1	-0.529073
LGALS9_LRP1	B-cells|MDSC	1	-0.483985
PDGFB_LRP1	B-cells|MDSC	1	-0.323733
MDK_LRP1	B-cells|MDSC	1	-0.334607
LGALS9_CD47	B-cells|MDSC	1	-0.415037
SIRPA_CD47	B-cells|MDSC	1	-0.202572
LGALS9_PTPRK	B-cells|MDSC	1	-0.579922
WNT5A_PTPRK	B-cells|MDSC	1	-0.37707
LGALS9_COLEC12	B-cells|MDSC	1	-0.409278
LGALS9_HAVCR2	B-cells|MDSC	1	-0.0724828
LGALS9_SORL1	B-cells|MDSC	1	-0.246395
MDK_SORL1	B-cells|MDSC	1	-0.118727
LGALS9_MRC2	B-cells|MDSC	1	-0.345564
PDGFB_PDGFRB	B-cells|MDSC	1	-0.212568
PDGFB_ADGRV1	B-cells|MDSC	1	-0.172994
WNT4_FZD8	B-cells|MDSC	1	-0.268817
WNT5A_FZD1	B-cells|MDSC	1	-0.270556
WNT4_FZD1	B-cells|MDSC	1	-0.395929
WNT7B_FZD1	B-cells|MDSC	1	-0.397828
WNT5A_FZD2	B-cells|MDSC	1	-0.182786
WNT5A_FZD5	B-cells|MDSC	1	-0.212568
WNT5A_ANTXR1	B-cells|MDSC	1	-0.22095
GDF11_ANTXR1	B-cells|MDSC	1	-0.0232698
WNT5A_FZD3	B-cells|MDSC	1	-0.212568
TNFRSF10A_TNFSF10	B-cells|MDSC	1	-0.239566
TNFRSF11B_TNFSF10	B-cells|MDSC	1	-0.169745
TNFRSF10B_TNFSF10	B-cells|MDSC	1	-0.239566
TNFRSF10C_TNFSF10	B-cells|MDSC	1	-0.239566
FGFR1_NCAM1	B-cells|MDSC	1	-0.325539
FGFR1_FGF9	B-cells|MDSC	1	-0.239566
FGFR3_FGF9	B-cells|MDSC	1	-0.132894
FGFR1_KL	B-cells|MDSC	1	-0.215915
FGFR2_EPHA4	B-cells|MDSC	1	-0.362158
EFNA1_EPHA4	B-cells|MDSC	1	-0.494109
EFNA4_EPHA4	B-cells|MDSC	1	-0.291592
EFNA5_EPHA4	B-cells|MDSC	1	-0.369595
EFNB2_EPHA4	B-cells|MDSC	1	-0.529073
FGFR3_EPHA4	B-cells|MDSC	1	-0.268817
FGFR2_NECTIN1	B-cells|MDSC	1	-0.364013
FGFR3_NECTIN1	B-cells|MDSC	1	-0.272297
FGFR2_XPR1	B-cells|MDSC	1	-0.305788
WNT4_SMO	B-cells|MDSC	1	-0.352916
WNT7B_FZD4	B-cells|MDSC	1	-0.321928
JAG1_NOTCH3	B-cells|MDSC	1	-0.358454
PLXNB2_PTN	B-cells|MDSC	1	-0.524915
PLXNB2_SEMA4D	B-cells|MDSC	1	0.353888
PLXNB1_SEMA4D	B-cells|MDSC	1	0.480265
CD72_SEMA4D	B-cells|MDSC	1	0.692427
TNFSF10_TNFRSF10D	B-cells|MDSC	1	-0.309359
MIF_TNFRSF10D	B-cells|MDSC	1	-0.713119
EFNA1_EPHA1	B-cells|MDSC	1	-0.436354
EFNA1_EPHA2	B-cells|MDSC	1	-0.753896
EFNA1_EPHA5	B-cells|MDSC	1	-0.345564
EFNA4_EPHA5	B-cells|MDSC	1	-0.161653
EFNA5_EPHA5	B-cells|MDSC	1	-0.234465
CXCR6_CXCL16	B-cells|MDSC	1	-0.50226
EREG_EGFR	B-cells|MDSC	1	-0.260152
PLD2_ARF1	B-cells|MDSC	1	-0.467932
SEMA3E_PLXND1	B-cells|MDSC	1	-0.145605
SEMA4A_PLXND1	B-cells|MDSC	1	-0.336428
EPHB6_EFNB2	B-cells|MDSC	1	-0.473931
EPHB2_EFNB2	B-cells|MDSC	1	-0.386468
EPHB6_EFNB1	B-cells|MDSC	1	-0.360305
EPHB2_EFNB1	B-cells|MDSC	1	-0.279284
EPHB3_EFNB1	B-cells|MDSC	1	-0.382702
EPHB4_EFNB1	B-cells|MDSC	1	-0.312939
EPHA4_EFNB1	B-cells|MDSC	1	-0.422752
EFNB2_EPHB4	B-cells|MDSC	1	-0.422752
EPHB2_EFNA5	B-cells|MDSC	1	-0.242977
EPHA2_EFNA5	B-cells|MDSC	1	-0.60165
EFNB2_EPHB3	B-cells|MDSC	1	-0.477944
EPHA1_EFNA4	B-cells|MDSC	1	-0.246395
EPHA2_EFNA4	B-cells|MDSC	1	-0.524915
GPR37_PSAP	B-cells|MDSC	1	-0.131313
CSF1_SIRPA	B-cells|MDSC	1	0.0621217
CEACAM1_CEACAM8	B-cells|MDSC	1	-1.15521
VEGFA_EPHB2	B-cells|MDSC	1	-0.272297
FZD6_WNT5A	B-cells|MDSC	1	-0.226004
PLXNC1_SEMA7A	B-cells|MDSC	1	0.0496308
LRP6_CKLF	B-cells|MDSC	1	-0.0816138
COPA_P2RY6	B-cells|MDSC	1	-0.200913
NAMPT_P2RY6	B-cells|MDSC	1	-0.200913
ADORA3_ENTPD1	B-cells|MDSC	1	0.507921
ANXA1_FPR1	B-cells|MDSC	1	-0.101598
ANXA1_FPR2	B-cells|MDSC	0.976	0.121679
APP_FPR2	B-cells|MDSC	1	0.259423
CSF1R_CSF1	B-cells|MDSC	1	0.586885
CSF1R_CSF3	B-cells|MDSC	1	-0.0831412
CSF1R_IL34	B-cells|MDSC	1	-0.244685
MET_HGF	B-cells|MDSC	1	-0.288065
CSF3_CSF3R	B-cells|MDSC	1	0.818032
SELL_SELPLG	B-cells|MDSC	1	0.546956
SPN_SIGLEC1	B-cells|MDSC	1	-0.14401
FLT4_PDGFC	B-cells|MDSC	1	-0.168123
C5AR1_RPS19	B-cells|MDSC	1	NA
CXCR1_CXCL5	B-cells|MDSC	1	-0.261881
CXCR2_CXCL5	B-cells|MDSC	1	-0.261881
CXCR1_YARS	B-cells|MDSC	1	-0.148801
CXCR1_CXCL6	B-cells|MDSC	1	-0.261881
CXCR2_CXCL6	B-cells|MDSC	1	-0.261881
CD6_ALCAM	B-cells|MDSC	1	-0.21424
AXL_IL15RA	B-cells|MDSC	1	-0.270556
IL15_IL15RA	B-cells|MDSC	1	-0.194295
LTBR_LTB	B-cells|MDSC	1	0.318461
CX3CR1_CX3CL1	B-cells|MDSC	1	-0.356606
DSG2_DSC3	B-cells|MDSC	1	-0.360305
DSC2_DSG2	B-cells|MDSC	1	-0.37146
CXCL17_GPR35	B-cells|MDSC	1	0.0690147
KLRG2_WNT5B	B-cells|NKT	1	-0.192645
PVR_NECTIN3	B-cells|NKT	1	-0.360305
CADM1_NECTIN3	B-cells|NKT	1	-0.411195
NECTIN1_NECTIN3	B-cells|NKT	1	-0.26708
NECTIN2_NECTIN3	B-cells|NKT	1	-0.440263
CADM1_CADM1	B-cells|NKT	1	-0.673463
NECTIN1_NECTIN4	B-cells|NKT	1	-0.352916
SPP1_CD44	B-cells|NKT	1	-0.619271
LGALS9_CD44	B-cells|NKT	1	-0.78339
HGF_CD44	B-cells|NKT	1	-0.510457
FGF1_FGFR1	B-cells|NKT	1	-0.452057
FGF1_FGFR2	B-cells|NKT	1	-0.456009
CD44_FGFR2	B-cells|NKT	1	-0.698998
TIMP1_FGFR2	B-cells|NKT	1	-0.360305
FGFR1_FGFR2	B-cells|NKT	1	-0.382702
FGF1_FGFR3	B-cells|NKT	1	-0.365871
FGFR2_FGFR3	B-cells|NKT	1	-0.272297
SPP1_PTGER4	B-cells|NKT	1	-0.237864
L1CAM_L1CAM	B-cells|NKT	1	-0.0846703
LAMP1_FAM3C	B-cells|NKT	1	-0.902389
PDCD1_FAM3C	B-cells|NKT	1	-0.222633
PDCD1_CD274	B-cells|NKT	1	-0.013043
CD80_CD274	B-cells|NKT	1	0.0840643
PDCD1_PDCD1LG2	B-cells|NKT	1	0.227741
EGFR_TGFA	B-cells|NKT	1	-0.274041
EGFR_TGFB1	B-cells|NKT	1	0.932817
EGFR_MIF	B-cells|NKT	1	-0.614845
CD74_MIF	B-cells|NKT	0.0009	0.970854
EGFR_AREG	B-cells|NKT	1	-0.386468
ICAM1_AREG	B-cells|NKT	1	-0.426625
EGFR_GRN	B-cells|NKT	1	-0.76366
TNFRSF1A_GRN	B-cells|NKT	1	-0.994241
TNFRSF1B_GRN	B-cells|NKT	1	-0.552156
EGFR_BTC	B-cells|NKT	1	-0.242977
ERBB3_BTC	B-cells|NKT	1	-0.263612
EGFR_COPA	B-cells|NKT	1	-0.351074
CD74_COPA	B-cells|NKT	1	1.0635
EGFR_EPGN	B-cells|NKT	1	-0.275786
EGFR_HBEGF	B-cells|NKT	1	-1.15843
CD44_HBEGF	B-cells|NKT	1	-1.699
TFRC_TNFSF13B	B-cells|NKT	1	-0.279284
CD40_TNFSF13B	B-cells|NKT	1	0.123004
CD74_APP	B-cells|NKT	1	0.926759
ICAM1_SPN	B-cells|NKT	1	0.339137
ICAM1_ITGAL	B-cells|NKT	1	0.180148
NRP1_VEGFA	B-cells|NKT	1	0.0621217
NRP2_VEGFA	B-cells|NKT	1	0.104337
NRP1_VEGFB	B-cells|NKT	1	-0.284546
NRP2_SEMA3F	B-cells|NKT	1	-0.209228
NRP2_SEMA3C	B-cells|NKT	1	-0.341903
TNF_VSIR	B-cells|NKT	1	-0.21424
CCL3_IDE	B-cells|NKT	1	-0.187707
BDNF_SORT1	B-cells|NKT	1	-0.15682
GRN_SORT1	B-cells|NKT	1	-0.77596
COPA_SORT1	B-cells|NKT	1	-0.456009
BDNF_F11R	B-cells|NKT	1	-0.438307
TNF_DAG1	B-cells|NKT	1	-0.456009
LGALS9_DAG1	B-cells|NKT	1	-0.541618
TNF_NOTCH1	B-cells|NKT	1	-0.392137
TNF_SEMA4C	B-cells|NKT	1	-0.234465
PLXNB2_SEMA4C	B-cells|NKT	1	-0.351074
TNF_FLT4	B-cells|NKT	1	-0.2567
TNF_ICOS	B-cells|NKT	1	0.0690147
TNF_TNFRSF1A	B-cells|NKT	1	-0.263612
TNF_FAS	B-cells|NKT	1	-0.347399
TNF_TNFRSF1B	B-cells|NKT	1	-0.00288828
TNF_RIPK1	B-cells|NKT	1	-0.291592
TNFSF10_RIPK1	B-cells|NKT	1	-0.275786
TNF_PTPRS	B-cells|NKT	1	-0.397828
PTN_PTPRS	B-cells|NKT	1	-0.367732
TNF_CELSR2	B-cells|NKT	1	-0.360305
NGFR_BDNF	B-cells|NKT	1	-0.155213
NCAM1_BDNF	B-cells|NKT	1	-0.172994
NGFR_NTF4	B-cells|NKT	1	0.0949116
NOTCH1_WNT4	B-cells|NKT	1	-0.37146
FZD6_WNT4	B-cells|NKT	1	-0.358454
NOTCH1_JAG1	B-cells|NKT	1	-0.288065
CCL3L3_DPP4	B-cells|NKT	1	-0.215915
CXCL11_DPP4	B-cells|NKT	1	-0.147202
CXCL10_DPP4	B-cells|NKT	1	-0.320126
CXCL2_DPP4	B-cells|NKT	1	-0.349235
CXCL1_CXCR1	B-cells|NKT	1	-0.00578235
CXCL2_CXCR1	B-cells|NKT	1	-0.158429
PPBP_CXCR1	B-cells|NKT	1	0.0593553
CXCL3_CXCR1	B-cells|NKT	1	-0.158429
CXCL1_CXCR2	B-cells|NKT	1	-0.00578235
CXCL2_CXCR2	B-cells|NKT	1	-0.158429
PPBP_CXCR2	B-cells|NKT	1	0.0593553
CXCL3_CXCR2	B-cells|NKT	1	-0.158429
LGALS9_MET	B-cells|NKT	1	-0.488026
LGALS9_LRP1	B-cells|NKT	1	-0.545824
PDGFB_LRP1	B-cells|NKT	1	-0.37707
MDK_LRP1	B-cells|NKT	1	-0.390245
LGALS9_CD47	B-cells|NKT	1	-0.00578235
SIRPA_CD47	B-cells|NKT	1	0.155749
LGALS9_PTPRK	B-cells|NKT	1	-0.545824
WNT5A_PTPRK	B-cells|NKT	1	-0.349235
LGALS9_COLEC12	B-cells|NKT	1	-0.401635
LGALS9_HAVCR2	B-cells|NKT	1	-0.360305
LGALS9_SORL1	B-cells|NKT	1	-0.277534
MDK_SORL1	B-cells|NKT	1	-0.147202
LGALS9_MRC2	B-cells|NKT	1	-0.351074
PDGFB_PDGFRB	B-cells|NKT	1	-0.212568
PDGFB_ADGRV1	B-cells|NKT	1	-0.14401
WNT4_FZD8	B-cells|NKT	1	-0.28279
WNT5A_FZD1	B-cells|NKT	1	-0.270556
WNT4_FZD1	B-cells|NKT	1	-0.395929
WNT7B_FZD1	B-cells|NKT	1	-0.397828
WNT5A_FZD2	B-cells|NKT	1	-0.182786
WNT5A_FZD5	B-cells|NKT	1	-0.1976
WNT5A_ANTXR1	B-cells|NKT	1	-0.187707
GDF11_ANTXR1	B-cells|NKT	1	0.0071955
WNT5A_FZD3	B-cells|NKT	1	-0.217591
TNFRSF10A_TNFSF10	B-cells|NKT	1	-0.0306192
TNFRSF11B_TNFSF10	B-cells|NKT	1	0.0299829
TNFRSF10B_TNFSF10	B-cells|NKT	1	-0.0306192
TNFRSF10C_TNFSF10	B-cells|NKT	1	-0.0306192
FGFR1_NCAM1	B-cells|NKT	1	-0.32916
FGFR1_FGF9	B-cells|NKT	1	-0.212568
FGFR3_FGF9	B-cells|NKT	1	-0.109359
FGFR1_KL	B-cells|NKT	1	-0.190997
FGFR2_EPHA4	B-cells|NKT	1	-0.349235
EFNA1_EPHA4	B-cells|NKT	1	-0.479955
EFNA4_EPHA4	B-cells|NKT	1	-0.279284
EFNA5_EPHA4	B-cells|NKT	1	-0.356606
EFNB2_EPHA4	B-cells|NKT	1	-0.514573
FGFR3_EPHA4	B-cells|NKT	1	-0.2567
FGFR2_NECTIN1	B-cells|NKT	1	-0.364013
FGFR3_NECTIN1	B-cells|NKT	1	-0.272297
FGFR2_XPR1	B-cells|NKT	1	-0.123434
WNT4_SMO	B-cells|NKT	1	-0.378944
WNT7B_FZD4	B-cells|NKT	1	-0.268817
JAG1_NOTCH3	B-cells|NKT	1	-0.312939
PLXNB2_PTN	B-cells|NKT	1	-0.492079
PLXNB2_SEMA4D	B-cells|NKT	1	-0.0908029
PLXNB1_SEMA4D	B-cells|NKT	1	0.0786098
CD72_SEMA4D	B-cells|NKT	1	0.352759
TNFSF10_TNFRSF10D	B-cells|NKT	1	-0.204233
MIF_TNFRSF10D	B-cells|NKT	1	-0.577767
EFNA1_EPHA1	B-cells|NKT	1	-0.467932
EFNA1_EPHA2	B-cells|NKT	1	-0.744197
EFNA1_EPHA5	B-cells|NKT	1	-0.251539
EFNA4_EPHA5	B-cells|NKT	1	-0.077041
EFNA5_EPHA5	B-cells|NKT	1	-0.145605
CXCR6_CXCL16	B-cells|NKT	1	-0.577767
EREG_EGFR	B-cells|NKT	1	-0.281036
PLD2_ARF1	B-cells|NKT	1	-0.454032
SEMA3E_PLXND1	B-cells|NKT	1	-0.114035
SEMA4A_PLXND1	B-cells|NKT	1	-0.300448
EPHB6_EFNB2	B-cells|NKT	1	-0.50226
EPHB2_EFNB2	B-cells|NKT	1	-0.413115
EPHB6_EFNB1	B-cells|NKT	1	-0.32916
EPHB2_EFNB1	B-cells|NKT	1	-0.249822
EPHB3_EFNB1	B-cells|NKT	1	-0.349235
EPHB4_EFNB1	B-cells|NKT	1	-0.281036
EPHA4_EFNB1	B-cells|NKT	1	-0.390245
EFNB2_EPHB4	B-cells|NKT	1	-0.430509
EPHB2_EFNA5	B-cells|NKT	1	-0.248108
EPHA2_EFNA5	B-cells|NKT	1	-0.608232
EFNB2_EPHB3	B-cells|NKT	1	-0.504305
EPHA1_EFNA4	B-cells|NKT	1	-0.249822
EPHA2_EFNA4	B-cells|NKT	1	-0.531156
GPR37_PSAP	B-cells|NKT	1	-0.732165
CSF1_SIRPA	B-cells|NKT	1	-0.199255
CEACAM1_CEACAM8	B-cells|NKT	1	-1.20423
VEGFA_EPHB2	B-cells|NKT	1	-0.281036
FZD6_WNT5A	B-cells|NKT	1	-0.234465
PLXNC1_SEMA7A	B-cells|NKT	1	0.0271541
LRP6_CKLF	B-cells|NKT	1	-0.0954196
COPA_P2RY6	B-cells|NKT	1	-0.362158
NAMPT_P2RY6	B-cells|NKT	1	-0.362158
ADORA3_ENTPD1	B-cells|NKT	1	-0.0335695
ANXA1_FPR1	B-cells|NKT	1	-0.771027
ANXA1_FPR2	B-cells|NKT	1	-0.78339
APP_FPR2	B-cells|NKT	1	-0.537424
CSF1R_CSF1	B-cells|NKT	1	-0.358454
CSF1R_CSF3	B-cells|NKT	1	-0.311148
CSF1R_IL34	B-cells|NKT	1	-0.244685
MET_HGF	B-cells|NKT	1	-0.251539
CSF3_CSF3R	B-cells|NKT	1	-0.202572
SELL_SELPLG	B-cells|NKT	1	1.17121
SPN_SIGLEC1	B-cells|NKT	1	-0.121863
FLT4_PDGFC	B-cells|NKT	1	-0.176251
C5AR1_RPS19	B-cells|NKT	1	0.175045
CXCR1_CXCL5	B-cells|NKT	1	-0.318326
CXCR2_CXCL5	B-cells|NKT	1	-0.318326
CXCR1_YARS	B-cells|NKT	1	-0.0877334
CXCR1_CXCL6	B-cells|NKT	1	-0.318326
CXCR2_CXCL6	B-cells|NKT	1	-0.318326
CD6_ALCAM	B-cells|NKT	1	-0.432455
AXL_IL15RA	B-cells|NKT	1	-0.362158
IL15_IL15RA	B-cells|NKT	1	-0.281036
LTBR_LTB	B-cells|NKT	1	0.54201
CX3CR1_CX3CL1	B-cells|NKT	1	-0.356606
DSG2_DSC3	B-cells|NKT	1	-0.360305
DSC2_DSG2	B-cells|NKT	1	-0.378944
CXCL17_GPR35	B-cells|NKT	1	-0.54372
KLRG2_WNT5B	B-cells|Progenitor	1	-0.013043
PVR_NECTIN3	B-cells|Progenitor	1	-0.275786
CADM1_NECTIN3	B-cells|Progenitor	1	-0.323733
NECTIN1_NECTIN3	B-cells|Progenitor	1	-0.187707
NECTIN2_NECTIN3	B-cells|Progenitor	1	-0.349235
CADM1_CADM1	B-cells|Progenitor	1	-0.0247367
NECTIN1_NECTIN4	B-cells|Progenitor	1	0.0786098
SPP1_CD44	B-cells|Progenitor	1	0.323082
LGALS9_CD44	B-cells|Progenitor	1	0.24123
HGF_CD44	B-cells|Progenitor	1	0.381837
FGF1_FGFR1	B-cells|Progenitor	1	-0.305788
FGF1_FGFR2	B-cells|Progenitor	1	-0.265345
CD44_FGFR2	B-cells|Progenitor	1	-0.473931
TIMP1_FGFR2	B-cells|Progenitor	1	-0.181149
FGFR1_FGFR2	B-cells|Progenitor	1	-0.199255
FGF1_FGFR3	B-cells|Progenitor	1	-0.200913
FGFR2_FGFR3	B-cells|Progenitor	1	-0.117161
SPP1_PTGER4	B-cells|Progenitor	1	-0.00578235
L1CAM_L1CAM	B-cells|Progenitor	1	0.00863031
LAMP1_FAM3C	B-cells|Progenitor	1	-0.452057
PDCD1_FAM3C	B-cells|Progenitor	1	0.0745054
PDCD1_CD274	B-cells|Progenitor	1	-0.14401
CD80_CD274	B-cells|Progenitor	1	-0.0380063
PDCD1_PDCD1LG2	B-cells|Progenitor	1	-0.145605
EGFR_TGFA	B-cells|Progenitor	1	-0.0679388
EGFR_TGFB1	B-cells|Progenitor	1	-0.424688
EGFR_MIF	B-cells|Progenitor	1	0.207893
CD74_MIF	B-cells|Progenitor	0.0009	1.29924
EGFR_AREG	B-cells|Progenitor	1	0.0593553
ICAM1_AREG	B-cells|Progenitor	1	0.0299829
EGFR_GRN	B-cells|Progenitor	1	0.0854247
TNFRSF1A_GRN	B-cells|Progenitor	1	-0.0380063
TNFRSF1B_GRN	B-cells|Progenitor	1	0.206643
EGFR_BTC	B-cells|Progenitor	1	-0.00433459
ERBB3_BTC	B-cells|Progenitor	1	-0.0218044
EGFR_COPA	B-cells|Progenitor	1	-0.027675
CD74_COPA	B-cells|Progenitor	0.0009	1.19409
EGFR_EPGN	B-cells|Progenitor	1	-0.215915
EGFR_HBEGF	B-cells|Progenitor	1	0.137504
CD44_HBEGF	B-cells|Progenitor	1	-0.0603973
TFRC_TNFSF13B	B-cells|Progenitor	1	-0.268817
CD40_TNFSF13B	B-cells|Progenitor	1	0.130931
CD74_APP	B-cells|Progenitor	0.0009	1.16479
ICAM1_SPN	B-cells|Progenitor	1	-0.296899
ICAM1_ITGAL	B-cells|Progenitor	1	-0.295128
NRP1_VEGFA	B-cells|Progenitor	1	-0.07552
NRP2_VEGFA	B-cells|Progenitor	1	-0.027675
NRP1_VEGFB	B-cells|Progenitor	1	-0.0350469
NRP2_SEMA3F	B-cells|Progenitor	1	-0.0247367
NRP2_SEMA3C	B-cells|Progenitor	1	0.0690147
TNF_VSIR	B-cells|Progenitor	1	-0.349235
CCL3_IDE	B-cells|Progenitor	1	0.0370307
BDNF_SORT1	B-cells|Progenitor	1	0.23634
GRN_SORT1	B-cells|Progenitor	1	-0.209228
COPA_SORT1	B-cells|Progenitor	1	0.0143553
BDNF_F11R	B-cells|Progenitor	1	0.328836
TNF_DAG1	B-cells|Progenitor	1	0.0758749
LGALS9_DAG1	B-cells|Progenitor	1	0.0172093
TNF_NOTCH1	B-cells|Progenitor	1	-0.118727
TNF_SEMA4C	B-cells|Progenitor	1	-0.205896
PLXNB2_SEMA4C	B-cells|Progenitor	1	-0.318326
TNF_FLT4	B-cells|Progenitor	1	-0.152003
TNF_ICOS	B-cells|Progenitor	1	-0.286304
TNF_TNFRSF1A	B-cells|Progenitor	1	-0.222633
TNF_FAS	B-cells|Progenitor	1	-0.226004
TNF_TNFRSF1B	B-cells|Progenitor	1	-0.323733
TNF_RIPK1	B-cells|Progenitor	1	-0.164884
TNFSF10_RIPK1	B-cells|Progenitor	1	-0.152003
TNF_PTPRS	B-cells|Progenitor	1	-0.258425
PTN_PTPRS	B-cells|Progenitor	1	-0.231075
TNF_CELSR2	B-cells|Progenitor	1	0.0100637
NGFR_BDNF	B-cells|Progenitor	1	-0.100051
NCAM1_BDNF	B-cells|Progenitor	1	-0.117161
NGFR_NTF4	B-cells|Progenitor	1	-0.0694519
NOTCH1_WNT4	B-cells|Progenitor	1	0.0257376
FZD6_WNT4	B-cells|Progenitor	1	0.0356239
NOTCH1_JAG1	B-cells|Progenitor	1	-0.161653
CCL3L3_DPP4	B-cells|Progenitor	1	-0.107803
CXCL11_DPP4	B-cells|Progenitor	1	-0.0454314
CXCL10_DPP4	B-cells|Progenitor	1	-0.204233
CXCL2_DPP4	B-cells|Progenitor	1	-0.232769
CXCL1_CXCR1	B-cells|Progenitor	1	-0.118727
CXCL2_CXCR1	B-cells|Progenitor	1	-0.286304
PPBP_CXCR1	B-cells|Progenitor	1	-0.0484122
CXCL3_CXCR1	B-cells|Progenitor	1	-0.286304
CXCL1_CXCR2	B-cells|Progenitor	1	-0.118727
CXCL2_CXCR2	B-cells|Progenitor	1	-0.286304
PPBP_CXCR2	B-cells|Progenitor	1	-0.0484122
CXCL3_CXCR2	B-cells|Progenitor	1	-0.286304
LGALS9_MET	B-cells|Progenitor	1	0.0129262
LGALS9_LRP1	B-cells|Progenitor	1	-0.390245
PDGFB_LRP1	B-cells|Progenitor	1	-0.237864
MDK_LRP1	B-cells|Progenitor	1	-0.249822
LGALS9_CD47	B-cells|Progenitor	1	-0.093879
SIRPA_CD47	B-cells|Progenitor	1	0.077243
LGALS9_PTPRK	B-cells|Progenitor	1	0.0786098
WNT5A_PTPRK	B-cells|Progenitor	1	0.210389
LGALS9_COLEC12	B-cells|Progenitor	1	-0.321928
LGALS9_HAVCR2	B-cells|Progenitor	1	-0.327348
LGALS9_SORL1	B-cells|Progenitor	1	0.0482362
MDK_SORL1	B-cells|Progenitor	1	0.153157
LGALS9_MRC2	B-cells|Progenitor	1	-0.340075
PDGFB_PDGFRB	B-cells|Progenitor	1	-0.209228
PDGFB_ADGRV1	B-cells|Progenitor	1	-0.101598
WNT4_FZD8	B-cells|Progenitor	1	-0.169745
WNT5A_FZD1	B-cells|Progenitor	1	-0.14401
WNT4_FZD1	B-cells|Progenitor	1	-0.258425
WNT7B_FZD1	B-cells|Progenitor	1	-0.260152
WNT5A_FZD2	B-cells|Progenitor	1	-0.142417
WNT5A_FZD5	B-cells|Progenitor	1	0
WNT5A_ANTXR1	B-cells|Progenitor	1	-0.179515
GDF11_ANTXR1	B-cells|Progenitor	1	0.0143553
WNT5A_FZD3	B-cells|Progenitor	1	-0.00144342
TNFRSF10A_TNFSF10	B-cells|Progenitor	1	0.155749
TNFRSF11B_TNFSF10	B-cells|Progenitor	1	0.209141
TNFRSF10B_TNFSF10	B-cells|Progenitor	1	0.155749
TNFRSF10C_TNFSF10	B-cells|Progenitor	1	0.155749
FGFR1_NCAM1	B-cells|Progenitor	1	-0.279284
FGFR1_FGF9	B-cells|Progenitor	1	-0.199255
FGFR3_FGF9	B-cells|Progenitor	1	-0.0969617
FGFR1_KL	B-cells|Progenitor	1	-0.145605
FGFR2_EPHA4	B-cells|Progenitor	1	0.0827026
EFNA1_EPHA4	B-cells|Progenitor	1	-0.013043
EFNA4_EPHA4	B-cells|Progenitor	1	0.134878
EFNA5_EPHA4	B-cells|Progenitor	1	0.077243
EFNB2_EPHA4	B-cells|Progenitor	1	-0.0380063
FGFR3_EPHA4	B-cells|Progenitor	1	0.151859
FGFR2_NECTIN1	B-cells|Progenitor	1	-0.0800879
FGFR3_NECTIN1	B-cells|Progenitor	1	-0.00433459
FGFR2_XPR1	B-cells|Progenitor	1	-0.0709665
WNT4_SMO	B-cells|Progenitor	1	-0.0543923
WNT7B_FZD4	B-cells|Progenitor	1	-0.153607
JAG1_NOTCH3	B-cells|Progenitor	1	-0.0679388
PLXNB2_PTN	B-cells|Progenitor	1	-0.490051
PLXNB2_SEMA4D	B-cells|Progenitor	1	-0.311148
PLXNB1_SEMA4D	B-cells|Progenitor	1	-0.115597
CD72_SEMA4D	B-cells|Progenitor	1	0.194087
TNFSF10_TNFRSF10D	B-cells|Progenitor	1	-0.112475
MIF_TNFRSF10D	B-cells|Progenitor	1	-0.459973
EFNA1_EPHA1	B-cells|Progenitor	1	-0.148801
EFNA1_EPHA2	B-cells|Progenitor	1	0.0717627
EFNA1_EPHA5	B-cells|Progenitor	1	-0.242977
EFNA4_EPHA5	B-cells|Progenitor	1	-0.0709665
EFNA5_EPHA5	B-cells|Progenitor	1	-0.137648
CXCR6_CXCL16	B-cells|Progenitor	1	0.0621217
EREG_EGFR	B-cells|Progenitor	1	0.0299829
PLD2_ARF1	B-cells|Progenitor	1	0.0635029
SEMA3E_PLXND1	B-cells|Progenitor	1	-0.129734
SEMA4A_PLXND1	B-cells|Progenitor	1	-0.318326
EPHB6_EFNB2	B-cells|Progenitor	1	0.22033
EPHB2_EFNB2	B-cells|Progenitor	1	0.275007
EPHB6_EFNB1	B-cells|Progenitor	1	-0.0174171
EPHB2_EFNB1	B-cells|Progenitor	1	0.0468403
EPHB3_EFNB1	B-cells|Progenitor	1	-0.0350469
EPHB4_EFNB1	B-cells|Progenitor	1	0.0200577
EPHA4_EFNB1	B-cells|Progenitor	1	-0.0679388
EFNB2_EPHB4	B-cells|Progenitor	1	-0.227692
EPHB2_EFNA5	B-cells|Progenitor	1	0.041243
EPHA2_EFNA5	B-cells|Progenitor	1	-0.248108
EFNB2_EPHB3	B-cells|Progenitor	1	-0.0454314
EPHA1_EFNA4	B-cells|Progenitor	1	-0.0484122
EPHA2_EFNA4	B-cells|Progenitor	1	-0.288065
GPR37_PSAP	B-cells|Progenitor	1	-0.0144996
CSF1_SIRPA	B-cells|Progenitor	1	-0.195946
CEACAM1_CEACAM8	B-cells|Progenitor	1	0.0172093
VEGFA_EPHB2	B-cells|Progenitor	1	-0.100051
FZD6_WNT5A	B-cells|Progenitor	1	-0.0969617
PLXNC1_SEMA7A	B-cells|Progenitor	1	0.15056
LRP6_CKLF	B-cells|Progenitor	1	-0.15682
COPA_P2RY6	B-cells|Progenitor	1	-0.347399
NAMPT_P2RY6	B-cells|Progenitor	1	-0.347399
ADORA3_ENTPD1	B-cells|Progenitor	1	-0.0954196
ANXA1_FPR1	B-cells|Progenitor	1	-0.753896
ANXA1_FPR2	B-cells|Progenitor	1	-0.771027
APP_FPR2	B-cells|Progenitor	1	-0.524915
CSF1R_CSF1	B-cells|Progenitor	1	-0.182786
CSF1R_CSF3	B-cells|Progenitor	1	-0.253257
CSF1R_IL34	B-cells|Progenitor	1	-0.227692
MET_HGF	B-cells|Progenitor	1	-0.24127
CSF3_CSF3R	B-cells|Progenitor	1	-0.189351
SELL_SELPLG	B-cells|Progenitor	1	0.27739
SPN_SIGLEC1	B-cells|Progenitor	1	-0.0394883
FLT4_PDGFC	B-cells|Progenitor	1	-0.07552
C5AR1_RPS19	B-cells|Progenitor	1	-0.086201
CXCR1_CXCL5	B-cells|Progenitor	1	0.530071
CXCR2_CXCL5	B-cells|Progenitor	1	0.530071
CXCR1_YARS	B-cells|Progenitor	1	0.0635029
CXCR1_CXCL6	B-cells|Progenitor	1	0.530071
CXCR2_CXCL6	B-cells|Progenitor	1	0.530071
CD6_ALCAM	B-cells|Progenitor	1	0.222805
AXL_IL15RA	B-cells|Progenitor	1	-0.189351
IL15_IL15RA	B-cells|Progenitor	1	-0.115597
LTBR_LTB	B-cells|Progenitor	1	-0.244685
CX3CR1_CX3CL1	B-cells|Progenitor	1	0.0908534
DSG2_DSC3	B-cells|Progenitor	1	-0.195946
DSC2_DSG2	B-cells|Progenitor	1	0.0840643
CXCL17_GPR35	B-cells|Progenitor	1	-0.514573
KLRG2_WNT5B	B-cells|Stromal	1	-0.150401
PVR_NECTIN3	B-cells|Stromal	1	0.0200577
CADM1_NECTIN3	B-cells|Stromal	1	-0.018878
NECTIN1_NECTIN3	B-cells|Stromal	1	0.0908534
NECTIN2_NECTIN3	B-cells|Stromal	1	-0.0409718
CADM1_CADM1	B-cells|Stromal	1	-0.687335
NECTIN1_NECTIN4	B-cells|Stromal	1	-0.320126
SPP1_CD44	B-cells|Stromal	1	-0.659723
LGALS9_CD44	B-cells|Stromal	1	-0.828793
HGF_CD44	B-cells|Stromal	1	-0.547932
FGF1_FGFR1	B-cells|Stromal	1	-0.0528949
FGF1_FGFR2	B-cells|Stromal	1	-0.413115
CD44_FGFR2	B-cells|Stromal	1	-0.648372
TIMP1_FGFR2	B-cells|Stromal	1	-0.320126
FGFR1_FGFR2	B-cells|Stromal	1	-0.340075
FGF1_FGFR3	B-cells|Stromal	1	-0.340075
FGFR2_FGFR3	B-cells|Stromal	1	-0.248108
SPP1_PTGER4	B-cells|Stromal	1	-0.234465
L1CAM_L1CAM	B-cells|Stromal	1	0.0648829
LAMP1_FAM3C	B-cells|Stromal	1	-0.734563
PDCD1_FAM3C	B-cells|Stromal	1	-0.114035
PDCD1_CD274	B-cells|Stromal	1	-0.00144342
CD80_CD274	B-cells|Stromal	1	0.0949116
PDCD1_PDCD1LG2	B-cells|Stromal	1	-0.150401
EGFR_TGFA	B-cells|Stromal	1	-0.189351
EGFR_TGFB1	B-cells|Stromal	1	0.295135
EGFR_MIF	B-cells|Stromal	1	-0.771027
CD74_MIF	B-cells|Stromal	0.0009	0.920674
EGFR_AREG	B-cells|Stromal	1	-0.486004
[truncated: 33,855 more rows]
