# Supplementary material for: Defining cellular population dynamics at single cell resolution during prostate cancer progression
Source: bioRxiv preprint, doi:10.1101/2022.03.02.482711, version 1 (2022-03-04)
Supplement: Table S5 [file 482711_file06.xlsx]

## Sheet: S5A Pten_cx vs Pten_cx_4EBP1M
Basal				Intermediate
gene	avg_log2FC	p_val	FDR	gene	avg_log2FC	p_val	FDR
Rps29	0.323209	4.9171e-98	6.7856e-96	Olfr907	-0.471184	2.65662e-176	2.63005e-174
Rps28	0.318936	2.831e-75	1.95339e-73	rtTA-eGFP	-0.49104	1.16561e-124	5.76975e-123
Rps27	0.448365	2.68711e-64	1.23607e-62	Ifi27l2a	-0.605948	5.32974e-117	1.75881e-115
Rpl38	0.323674	2.09803e-63	7.2382e-62	Tpm3-rs7	-0.315418	2.08167e-110	5.15214e-109
Olfr907	-0.449298	5.55037e-62	1.5319e-60	Wnk1	-0.561958	2.20912e-102	4.37405e-101
Wnk1	-0.660338	7.2334e-61	1.66368e-59	Actg1	0.279898	3.51444e-90	5.79882e-89
Tpm3-rs7	-0.289607	3.09149e-39	6.09465e-38	Cep85	-0.40692	2.98865e-78	4.22681e-77
rtTA-eGFP	-0.421428	4.41152e-38	7.60988e-37	Rpl23a	-0.424859	6.12142e-77	7.57526e-76
Rpl6	0.283184	1.35941e-36	2.08443e-35	Bst2	-0.459105	4.30916e-75	4.74007e-74
Rpl23a	-0.36488	4.27862e-36	5.9045e-35	Lgals3	0.357233	4.31376e-67	4.27063e-66
Eif1	0.334165	2.18255e-34	2.73811e-33	Rpl38	0.295102	1.71078e-65	1.5397e-64
Rps16	-0.289198	7.59872e-34	8.73853e-33	Hes1	0.543974	1.1514e-60	9.49908e-60
AW822252	-0.355319	3.83731e-31	4.07346e-30	AC149090.1	-0.412654	3.25706e-60	2.48038e-59
Rpl11	-0.339594	2.45591e-30	2.42082e-29	Amd2	0.464913	8.04228e-59	5.68704e-58
Tnfrsf12a	0.410383	7.58184e-30	6.97529e-29	Rps20	-0.285912	5.09372e-58	3.36186e-57
Bst2	-0.441047	8.54223e-29	7.36767e-28	Rps16	-0.336543	3.67414e-56	2.27338e-55
Gpx2	-0.425536	4.0318e-28	3.27287e-27	Rps27	0.326016	3.47287e-53	2.02243e-52
Actg1	0.296128	1.17351e-27	8.99693e-27	Vmn1r13	-0.348464	5.68297e-53	3.12563e-52
Rpl15	-0.289846	2.09598e-27	1.52234e-26	Pglyrp1	-0.592703	1.68852e-52	8.79808e-52
Pecam1	-0.265761	1.63367e-26	1.12723e-25	Pecam1	-0.313665	3.86256e-52	1.91197e-51
Rpl10a	-0.316974	3.15331e-26	2.07217e-25	AW822252	-0.313828	5.53655e-52	2.61009e-51
Amd2	0.642371	5.27468e-26	3.30866e-25	Rpl13	-0.333196	1.00024e-51	4.50108e-51
Atp5g1	-0.315881	7.92849e-26	4.75709e-25	Sdc4	0.448786	3.32411e-50	1.43081e-49
Gm15920	-0.338387	1.40498e-25	8.07866e-25	Apobec3	0.684525	1.05145e-49	4.33724e-49
Ppp1r14b	-0.36439	1.86793e-25	9.92593e-25	Rpl6	0.293935	4.68282e-47	1.8544e-46
Tmem87a	-0.298069	1.8701e-25	9.92593e-25	Rbm3	0.355527	8.29661e-46	3.15909e-45
Polr2f	-0.298918	7.17814e-25	3.66883e-24	Rpl28	-0.301531	5.61481e-44	2.05876e-43
Ifi27l2a	-0.529307	1.57732e-24	7.77394e-24	Uba52	-0.30418	5.79211e-42	2.04792e-41
Aes	-0.33028	1.15662e-23	5.5039e-23	Bmt2	-0.258764	5.55499e-41	1.89636e-40
Marcks	-0.306986	1.3953e-23	6.41839e-23	Paip1	-0.260392	8.90439e-41	2.93845e-40
Bhlhe41	-0.296644	3.04105e-23	1.35376e-22	Lgals7	-0.624469	9.99936e-41	3.19334e-40
Bmt2	-0.261576	4.49584e-23	1.93883e-22	Slc15a2	-0.29285	1.44684e-40	4.47615e-40
Slc15a2	-0.33311	2.18012e-22	8.93392e-22	Rps12	-0.282993	1.45223e-38	4.35668e-38
Apoc1	0.733513	2.20111e-22	8.93392e-22	Aes	-0.270244	2.52214e-38	7.34387e-38
Gm47283	-0.379123	2.28636e-22	9.01479e-22	Rps23	-0.268353	1.43116e-37	4.04813e-37
Vamp8	-0.274643	3.14749e-22	1.20654e-21	H2-Q7	-0.387848	4.8457e-36	1.33257e-35
Rpl27	-0.271768	4.13822e-22	1.54344e-21	Dstn	0.254701	1.42875e-35	3.82288e-35
Mtch1	-0.276279	5.3734e-22	1.95139e-21	Lgals3bp	-0.314962	1.62711e-35	4.23904e-35
Mrpl36	-0.266212	6.27787e-22	2.2017e-21	Cirbp	0.410726	6.2986e-35	1.59888e-34
Sdc4	0.435863	6.38173e-22	2.2017e-21	Gm15920	-0.273759	1.7419e-33	4.3112e-33
Lgals1	-0.622493	1.0376e-21	3.46199e-21	Ifitm1	-0.927032	7.40818e-33	1.7888e-32
Rpl3	-0.259406	1.05365e-21	3.46199e-21	Bhlhe41	-0.275123	2.60122e-32	6.13146e-32
Ly6a	-0.305604	3.9109e-20	1.25512e-19	Wfdc18	-0.373829	1.71947e-31	3.95879e-31
Sfn	0.370109	1.16462e-19	3.65269e-19	H2-Q6	-0.264593	1.89517e-28	4.26413e-28
Mcc	-0.2651	2.68078e-19	8.18023e-19	Tmsb10	-0.26152	6.24192e-27	1.37322e-26
Ube2m	-0.278105	2.72674e-19	8.18023e-19	Hbegf	0.281794	1.53065e-26	3.29423e-26
Dctpp1	-0.285111	3.09616e-19	9.09086e-19	Tfcp2l1	-0.308607	7.02204e-26	1.47911e-25
Ucp2	-0.283683	3.52319e-19	1.01292e-18	H2-T22	-0.258021	6.40454e-25	1.32094e-24
Smap1	-0.281333	5.53193e-19	1.55797e-18	Plaur	0.442104	7.96677e-25	1.60961e-24
Hras	-0.263872	1.81831e-18	5.01854e-18	Arg1	-0.306688	1.40887e-24	2.78956e-24
Stat1	-0.283458	1.89347e-18	5.1235e-18	Dnajc10	-0.352104	3.78932e-24	7.35574e-24
Sgip1	-0.258621	6.61387e-18	1.75522e-17	Ctsd	-0.271036	5.58694e-24	1.06367e-23
Nfkb1	-0.260501	9.47864e-18	2.46802e-17	Apoe	-0.277464	2.77116e-23	5.17632e-23
Ccdc34	-0.332967	1.19876e-17	3.06351e-17	Ly6k	-0.464067	4.75838e-23	8.72371e-23
Krt18	0.364341	1.76111e-17	4.41879e-17	Ddit4	-0.324053	1.15788e-22	2.08419e-22
Scand1	-0.250357	4.11303e-17	1.01357e-16	Pigr	0.287664	1.83015e-22	3.23545e-22
Fn1	-0.403349	5.56872e-17	1.34822e-16	Dmkn	-0.366897	1.47351e-20	2.55925e-20
Lgals3bp	-0.256105	1.31033e-16	3.11769e-16	Arl14	0.408545	1.90253e-20	3.24743e-20
C1qtnf12	-0.254962	1.61848e-16	3.78559e-16	Sox4	-0.25576	7.71226e-20	1.29409e-19
Edf1	-0.254062	2.70001e-16	6.21002e-16	Car8	0.361383	1.17995e-19	1.94691e-19
Cdk6	-0.262206	3.81149e-16	8.62271e-16	Krt6a	-0.363033	1.75435e-19	2.84722e-19
Kcnn4	-0.253269	7.20106e-16	1.60282e-15	Oas2	-0.260321	3.05531e-19	4.87864e-19
Hdgf	-0.254058	9.57161e-16	2.09664e-15	Cbr2	0.361221	3.14113e-19	4.93606e-19
Sox4	-0.311555	1.28711e-15	2.77534e-15	Ffar4	0.401588	3.53686e-19	5.41704e-19
Plet1	0.525391	6.16757e-15	1.30942e-14	Krt5	-0.267788	3.55664e-19	5.41704e-19
Irf7	-0.260209	1.04417e-14	2.18327e-14	Car2	0.29815	6.73473e-19	1.01021e-18
S100a14	-0.256032	4.75671e-14	9.7974e-14	Apoc1	0.401815	6.32232e-18	9.34193e-18
Hes1	0.567713	7.88187e-14	1.59956e-13	Ifi202b	-0.334865	7.37759e-18	1.07409e-17
Hbegf	0.364965	1.83186e-13	3.66372e-13	Cystm1	0.259839	5.3067e-16	7.61396e-16
Crip1	-0.520218	4.44938e-13	8.77164e-13	mt-Co1	-0.253988	2.46099e-14	3.48055e-14
Wfdc18	-0.40937	4.5591e-13	8.86134e-13	Nipal1	0.293677	1.25351e-13	1.74785e-13
Cldn4	0.430654	1.27243e-12	2.43882e-12	Calcb	-0.28705	4.50912e-13	6.20004e-13
Dcn	0.372492	4.12673e-12	7.80122e-12	Thbs1	0.284588	9.6151e-13	1.30397e-12
Sprr1a	0.484913	6.83529e-11	1.27469e-10	Plat	0.445469	7.89621e-12	1.05638e-11
Tubb5	-0.251879	1.36268e-10	2.50733e-10	Sgk1	0.290236	3.9932e-11	5.27103e-11
Hsp90aa1	0.272816	4.79371e-10	8.70436e-10	Maff	0.324408	9.91401e-11	1.29143e-10
Cd9	0.294826	5.1772e-10	9.27861e-10	Fabp5	0.87274	2.09333e-10	2.69142e-10
Snhg11	0.260635	5.93184e-10	1.04948e-09	Dusp5	0.337533	2.15321e-10	2.73292e-10
Wfdc2	-0.308939	9.59141e-10	1.67546e-09	Krt15	-0.269698	1.15659e-09	1.4494e-09
Nupr1	-0.279359	5.19523e-09	8.96177e-09	Fam107b	0.299619	4.21957e-09	5.22172e-09
Plaur	0.510072	1.26214e-08	2.15031e-08	Wfdc2	-0.291283	8.12214e-09	9.92706e-09
Hspa1a	0.486351	1.50184e-07	2.52749e-07	Rgs2	0.266401	2.04386e-07	2.46759e-07
F3	0.487832	1.88014e-07	3.12602e-07	Ubd	-0.279402	4.49421e-07	5.36057e-07
Cdkn1a	0.285958	2.29475e-07	3.76994e-07	Edn1	0.33393	5.65194e-07	6.66122e-07
Dnaja1	0.372115	2.40897e-07	3.91104e-07	Arc	0.299249	7.56506e-07	8.81107e-07
Gadd45a	0.441327	7.54444e-07	1.21062e-06	Tax1bp1	0.253262	9.17142e-07	1.05578e-06
Krt19	0.326981	7.92915e-07	1.25773e-06	Sprr1a	0.262779	1.1864e-06	1.35004e-06
Ubb	0.313639	8.20907e-07	1.28733e-06	Clec2d	-0.263669	1.5075e-06	1.69594e-06
Rheb	0.347258	2.03811e-06	3.16022e-06	Gadd45g	0.291846	1.72981e-06	1.92418e-06
Igfbp5	0.450947	2.08514e-06	3.19722e-06	Tceal8	0.254791	3.5434e-06	3.89774e-06
Thbs1	0.286069	7.86426e-06	1.1926e-05	Prdx6	0.274018	6.45566e-05	7.02319e-05
Dnajb1	0.327522	1.68582e-05	2.52873e-05	Saa3	0.279597	0.00176435	0.0018986
Krt8	0.264363	1.97101e-05	2.92472e-05	Lrg1	0.255137	0.00533041	0.00567431
Actb	0.350492	3.66986e-05	5.38766e-05	Akap10	0.280436	0.0224082	0.0236001
Csrp1	0.318252	9.93519e-05	0.000144322
Inhba	-0.264097	0.000117891	0.000169468
Dusp5	0.419531	0.000133457	0.000189867
Atp1b1	0.277262	0.000148312	0.000208847
Dusp1	0.281222	0.000450273	0.000627653
Maff	0.358168	0.000884664	0.00122084
Ly6d	0.289802	0.00145286	0.00198509
Prr9	0.488943	0.00167932	0.00227202
Ifrd1	0.320116	0.00364859	0.00488841
Srsf5	0.292543	0.00411299	0.00545762
Nbl1	0.341471	0.00615045	0.00808345
Ctsl	0.392272	0.00683378	0.0088968
Cirbp	0.277631	0.00700907	0.00903973
Map2k3	0.273315	0.0082356	0.0105233
Fhl2	0.320962	0.00880766	0.011151
Smoc2	0.35827	0.0103724	0.0130127
Tuba1c	0.337698	0.0115638	0.0143766
Dusp2	0.309582	0.0211069	0.0260067
Arid5b	0.312058	0.0253294	0.0309332
Oser1	0.274925	0.0353992	0.0428517

## Sheet: S5B Transgene+ cx vs 4EBP1M
Basal				Intermediate
gene	avg_log2FC	p_val	FDR	gene	avg_log2FC	p_val	FDR
Rps24	0.519939	4.68456e-11	9.67361e-08	Rpl39	0.47221	3.83913e-07	0.000511757
mt-Nd1	-0.930211	9.56541e-11	9.87629e-08	Ifi27l2a	-1.30866	2.29138e-06	0.0015272
Rps29	0.473873	1.23921e-09	8.52987e-07	Arhgef4	0.363489	3.68732e-06	0.0016384
Rplp2	0.531177	1.81732e-09	9.38192e-07	Flnc	0.355399	6.42962e-06	0.00214267
Eif1	0.655214	5.36425e-09	2.21543e-06	Actg1	0.38798	1.09823e-05	0.00283649
Tpt1	0.47255	1.69603e-08	5.83716e-06	Eps15l1	0.512732	1.37886e-05	0.00283649
Atp5j2	-1.16187	1.9917e-08	5.8755e-06	Crem	0.534003	1.48953e-05	0.00283649
Rpl38	0.508266	1.17389e-07	2.98704e-05	Eef1a1	0.439204	4.9009e-05	0.00708002
Rps27	0.701676	1.30186e-07	2.98704e-05	Rpl23	0.359547	5.18169e-05	0.00708002
Rps21	0.468467	1.91243e-07	3.94916e-05	Tpt1	0.383658	5.31134e-05	0.00708002
Rps28	0.430797	2.38267e-07	4.47291e-05	Tax1bp1	0.726	9.47615e-05	0.0114834
Rpl41	-0.384981	3.00243e-07	5.16668e-05	Hspa4	0.641948	0.000110545	0.0119059
Rpl35a	0.474309	6.17208e-07	9.80412e-05	Wfdc18	-2.1046	0.000127161	0.0119059
Gpx2	-1.45816	7.51789e-07	0.000110889	Rpp25l	0.523241	0.000130724	0.0119059
Cox8a	-0.583979	1.94901e-06	0.000268313	Rps29	0.376278	0.000133975	0.0119059
Rps3a1	0.350678	3.16316e-06	0.000408246	Ifit3	-0.491733	0.000162969	0.0133481
Rpl26	0.37456	4.13849e-06	0.000482191	Olfr907	-0.442938	0.000170231	0.0133481
Psma7	-0.851407	4.20312e-06	0.000482191	Capns1	-0.704339	0.000193316	0.0143161
mt-Co2	-0.970157	5.05172e-06	0.000549042	Rora	0.547077	0.000416435	0.0280148
Tma7	-0.887844	5.46215e-06	0.000563967	Atox1	-0.565229	0.000420327	0.0280148
Srp9	-0.863115	7.27015e-06	0.000714898	mt-Nd1	-0.361027	0.000465502	0.0295483
Rplp0	0.342594	7.71754e-06	0.000724397	Ninl	0.473798	0.000528717	0.0320354
Cox6c	-0.740963	9.50698e-06	0.000853562	Hdgf	-0.675632	0.00067652	0.0390916
Apoc1	1.4068	1.04136e-05	0.000896003	Fkbp4	-0.664841	0.000725105	0.0390916
Atp5g1	-0.875544	1.12006e-05	0.000925171	Rpl38	0.354292	0.00073315	0.0390916
Rpl23	0.327297	1.17378e-05	0.000932256	Sh3bgrl3	-0.678174	0.000914204	0.0468705
Krt18	0.758784	1.30999e-05	0.0010019	Rps24	0.309141	0.00098675	0.0474621
Ppp1r14b	-0.993177	1.48525e-05	0.00109537	Pigr	0.563264	0.00101807	0.0474621
rtTA-eGFP	0.527226	1.73744e-05	0.00123718	Hspa8	0.390562	0.00103256	0.0474621
H2afv	-0.986121	2.04539e-05	0.00140791	Rps21	0.285645	0.00107669	0.047841
Ifitm1	1.05842	3.44404e-05	0.00229417
Cald1	-1.0777	3.81272e-05	0.0024491
Rps27l	-0.645953	3.91381e-05	0.0024491
Wnk1	-0.80739	4.06124e-05	0.00246661
Rps17	0.438378	4.30998e-05	0.00254289
Ndufa7	-0.676386	5.56261e-05	0.00319078
Eef1a1	0.446684	6.81621e-05	0.00380418
Polr2f	-0.857173	7.46425e-05	0.00405623
AW822252	-0.734472	9.88225e-05	0.00523253
Anapc11	-0.869983	0.000101608	0.00524554
Rpl6	0.444277	0.000109322	0.00542889
Naca	0.375085	0.000110418	0.00542889
Uqcc2	-0.371253	0.000127733	0.00613413
Sf3b5	-0.796879	0.000132407	0.00621409
Rps4x	0.351628	0.000136119	0.00624636
Ndufa6	-0.445635	0.000145066	0.0065122
S100a14	-0.716402	0.000152522	0.00665907
Dcn	0.748089	0.000156413	0.00665907
Rala	-0.798314	0.000158012	0.00665907
Dsp	-0.770764	0.000163368	0.00674711
Calu	-0.786269	0.00016948	0.00686229
Hnrnpk	0.687238	0.000178668	0.00698728
Selenow	-0.567609	0.000179334	0.00698728
Ifi27l2a	-1.43814	0.000182772	0.00698935
Sarnp	-0.714924	0.000202531	0.00751652
Cdc37	-0.74444	0.000205652	0.00751652
Scand1	-0.742797	0.000207478	0.00751652
Krt14	0.907714	0.00021316	0.00758924
Rpl4	0.356969	0.000218572	0.00760913
Cldn4	0.887271	0.000228384	0.00760913
Rpl30	0.574337	0.000234102	0.00760913
Ube2b	-0.637966	0.000237734	0.00760913
Igsf3	-0.861736	0.000237846	0.00760913
S100a16	-0.607512	0.000239146	0.00760913
Rpl39	0.27423	0.000245826	0.00760913
Elof1	-0.746907	0.000246046	0.00760913
Rps3	0.294931	0.000248779	0.00760913
Rpl37	0.326342	0.000250567	0.00760913
Rps5	0.281661	0.000272337	0.00807951
Use1	0.713287	0.000278574	0.00807951
Ppdpf	-0.728593	0.000279201	0.00807951
D17Wsu92e	-0.723632	0.000281707	0.00807951
Rad23b	-0.765478	0.000293813	0.00821241
Pgam1	-0.743918	0.000295958	0.00821241
Oxct1	-0.821054	0.000298272	0.00821241
Scd2	-0.796346	0.000310732	0.00844291
Rtf1	-0.686519	0.000331451	0.00888892
Hnrnpl	-0.705286	0.000340133	0.0090048
Atp5e	-0.378421	0.000346298	0.00905195
Tmem238	-0.76968	0.000370997	0.00957637
Alkbh5	-0.74806	0.00039058	0.00995737
Mtch1	-0.657778	0.000410763	0.0103442
Atp6v0b	-0.687649	0.000424021	0.0104365
Erp29	-0.565648	0.000424535	0.0104365
Pecam1	-0.619333	0.000434481	0.010456
Pitpna	-0.39477	0.000435454	0.010456
Isg15	-1.07273	0.000446591	0.0105045
Mrpl36	-0.740225	0.000449352	0.0105045
Pan3	-0.75599	0.000452737	0.0105045
Olfr907	-0.498921	0.000462363	0.0106087
Zfp36	-0.829142	0.000479286	0.0108761
H2afz	-0.707986	0.0004934	0.0110116
Ptpn11	-0.663362	0.000499108	0.0110116
Akr1a1	-0.550188	0.000504368	0.0110116
Rer1	-0.676595	0.000508267	0.0110116
Ppm1g	-0.750246	0.000513117	0.0110116
Dusp1	0.766503	0.000517253	0.0110116
Ddx24	-0.721433	0.000537726	0.0113306
Commd1	-0.688096	0.000552276	0.0115197
Smarca4	-0.683319	0.000569645	0.0117632
Romo1	-0.479442	0.000583905	0.0119382
Actn1	-0.418693	0.000599138	0.0121296
Cachd1	0.393866	0.00060908	0.0122112
Lbp	0.568585	0.000620298	0.0123165
Basp1	-0.908903	0.000635484	0.0124393
Txnl4a	-0.34278	0.000642051	0.0124393
Cox14	-0.596303	0.000644552	0.0124393
Anp32b	-0.48791	0.000662464	0.0126666
Lpcat2	0.573269	0.000686641	0.0128777
Stx4a	-0.642856	0.000687813	0.0128777
Prelid1	-0.704766	0.000692214	0.0128777
Mrps12	-0.755856	0.00077267	0.0142101
Hras	-0.470933	0.000783189	0.0142101
Nudc	-0.733039	0.000784481	0.0142101
Cox7a2l	0.466888	0.000809223	0.0145308
Rps25	0.315874	0.000817321	0.0145497
Ywhaz	-0.555032	0.000829017	0.0146318
Eif4e2	-0.656565	0.000846732	0.0148158
Ubb	0.557823	0.000853793	0.0148158
Eprs	-0.672333	0.00087398	0.0149208
Tmf1	-0.509676	0.000874296	0.0149208
Apol9a	-0.507281	0.000891717	0.0150934
Hsp90aa1	0.509696	0.000905793	0.0150985
Ndufv3	-0.612895	0.000906639	0.0150985
Cdk4	-0.627069	0.000956471	0.0158009
Tmod3	-0.637464	0.000991693	0.0162528
Actg1	0.412017	0.00100402	0.0163081
Kras	-0.628443	0.00101305	0.0163081
Qk	-0.725621	0.00101876	0.0163081
Sec61b	-0.490136	0.00103701	0.0164724
Rpl7	0.364921	0.00107607	0.0169625
Mmd	0.443634	0.00109624	0.0171495
Aldh3a1	0.828621	0.00110483	0.0171539
B230219D22Rik	-0.665371	0.00112407	0.0173224
Itga6	-0.522928	0.00113968	0.0174052
mt-Nd6	-0.561757	0.00115752	0.0174052
Rab1a	-0.610885	0.0011617	0.0174052
Apbb2	-0.602056	0.00116315	0.0174052
Pmepa1	-0.524442	0.00117761	0.0174948
Arhgap5	-0.641779	0.0011939	0.01761
Ank2	-0.708852	0.00121512	0.0177959
Cox4i1	-0.381301	0.00123396	0.0179446
Pbrm1	-0.699248	0.00127172	0.0183643
Ubl5	-0.573095	0.001335	0.0191443
Tnfrsf12a	0.460491	0.00134625	0.0191724
Ost4	-0.536585	0.00137308	0.019391
Wfdc18	-1.47485	0.00138038	0.019391
Plxnb2	-0.622693	0.00140495	0.0195434
Phlda3	-0.63716	0.00141015	0.0195434
Pkn2	-0.457537	0.00147996	0.0203741
Tmem167	-0.608226	0.00153896	0.0209329
Naa50	-0.706113	0.00154082	0.0209329
Rab25	-0.735475	0.00156985	0.0211879
Nectin1	-0.624397	0.00159364	0.0212649
Mpnd	-0.379948	0.001607	0.0212649
Mark2	-0.595814	0.001607	0.0212649
Timm10b	-0.680299	0.00161675	0.0212649
Paip2	-0.431941	0.00163719	0.0213975
Cd9	0.552754	0.00166339	0.0216032
Lgals3bp	-0.650685	0.00168502	0.021742
Rpl35	0.305764	0.00169514	0.021742
Mark3	-0.614984	0.00173982	0.0221773
Tuba1c	0.748551	0.00177698	0.022461
Ddx5	0.556655	0.00178383	0.022461
Arhgdia	-0.448419	0.00179602	0.0224775
Rac3	-0.607037	0.00182268	0.0226447
Sdf2l1	-0.55921	0.00183297	0.0226447
Manf	-0.502544	0.00184228	0.0226447
Rps15	0.308912	0.00186133	0.0227434
Oasl2	-0.507862	0.00188729	0.0229251
Npepps	-0.386573	0.00190364	0.0229884
Atp5mpl	-0.552033	0.00194685	0.0233735
Tfap2a	-0.653542	0.00197356	0.0235573
Hnrnpul2	-0.585394	0.0019876	0.0235884
Pfn1	-0.335325	0.00201314	0.0237218
Btg2	-0.718064	0.00202181	0.0237218
Psma4	-0.645217	0.00204916	0.0238201
Tomm22	-0.511163	0.00205807	0.0238201
Caprin1	-0.618924	0.0020648	0.0238201
Nedd9	-0.756788	0.0020968	0.0240549
Atpif1	-0.463441	0.00213147	0.0241477
Coa3	-0.648446	0.00213437	0.0241477
Knop1	-0.438006	0.00214682	0.0241477
Trib1	-0.541018	0.00215166	0.0241477
Mrpl51	-0.531622	0.00219937	0.0245497
Fryl	-0.584128	0.00221371	0.024577
Cycs	-0.57733	0.00224352	0.024769
Nxn	-0.658253	0.002255	0.024769
Glmp	-0.473258	0.00228213	0.0249344
Arpc5l	-0.629433	0.00234667	0.0253729
Ndufa5	-0.67279	0.00237095	0.0253729
Atp5k	-0.672477	0.00238128	0.0253729
Bst2	-0.772447	0.00238419	0.0253729
Eef2	0.597177	0.00238972	0.0253729
Cs	-0.37236	0.00239598	0.0253729
Bckdk	-0.539963	0.00241065	0.0253979
Dcxr	-0.579809	0.00242445	0.0254136
Ndufa1	-0.574692	0.00243972	0.0254182
Pebp1	-0.36468	0.0024495	0.0254182
Sumo3	-0.508626	0.00247889	0.0255945
Mkln1	-0.664936	0.00252388	0.0256684
Ndufa4	-0.617508	0.00253038	0.0256684
Zfp260	-0.411745	0.00253258	0.0256684
Bzw1	-0.521261	0.00253576	0.0256684
Ccdc34	-0.659154	0.00255021	0.0256887
Brd4	-0.361879	0.00256394	0.0257016
mt-Cytb	-0.412867	0.00259121	0.0257299
Erbin	-0.435264	0.00259168	0.0257299
Map2k4	-0.60444	0.00262501	0.0257937
Vps29	-0.49989	0.00263108	0.0257937
Fam49b	-0.602293	0.00263558	0.0257937
Clic1	-0.457979	0.00266872	0.0259948
Gatad2a	-0.629288	0.00268816	0.0260612
Ckap4	-0.478714	0.00270208	0.0260738
Uqcrb	-0.428776	0.00271746	0.0261003
Psmb3	-0.613634	0.00273662	0.0261626
S100a1	-0.597881	0.00278731	0.0264703
Ube3a	-0.547713	0.00281272	0.0264703
Tmem14c	-0.613924	0.00281485	0.0264703
Gipc1	-0.566126	0.00282081	0.0264703
Cyth2	-0.582822	0.0028329	0.0264703
Tcf7l2	-0.384168	0.00287204	0.0267152
Wac	-0.562561	0.00289319	0.0267375
mt-Co1	-0.434687	0.00290034	0.0267375
Ctsl	0.706798	0.00292942	0.0267732
Clock	-0.477007	0.00293014	0.0267732
Ostc	-0.552951	0.00297088	0.0269622
Ube2h	-0.525952	0.00297694	0.0269622
Sumo1	-0.383292	0.00301134	0.0271233
Samhd1	-0.546283	0.003021	0.0271233
Tmem248	-0.519414	0.00315502	0.0279893
Pcm1	-0.525119	0.00315502	0.0279893
Cks1b	-0.654895	0.00317073	0.0279893
Marcks	-0.633347	0.00317167	0.0279893
Bri3bp	-0.568179	0.00328609	0.0288183
Xaf1	-1.00123	0.00330606	0.0288183
Mif	-0.533175	0.00330747	0.0288183
Barx2	-0.722094	0.00337543	0.0292868
Tmem30b	-0.49925	0.00339637	0.0293204
Cox7a2	-0.428894	0.00340769	0.0293204
Tmem256	-0.442081	0.00343673	0.0294475
Kif1b	-0.36239	0.00353244	0.0300474
Tapbp	-0.641619	0.00353584	0.0300474
Flna	-0.505911	0.00359086	0.0303898
Sbsn	-0.648153	0.00364948	0.0307599
Tor1aip2	-0.459709	0.00368609	0.0309422
Ndufs6	-0.509547	0.00371768	0.0309571
Tmem126a	-0.613784	0.00372423	0.0309571
Reep3	-0.377356	0.00373284	0.0309571
Rcc2	-0.422107	0.00377142	0.031152
Pafah1b2	-0.537278	0.00382628	0.0313829
Map7d1	-0.564248	0.00385069	0.0313829
Kdm2a	-0.546996	0.00389648	0.0313829
Ube2j2	-0.46315	0.00390169	0.0313829
Mlec	-0.410505	0.00392107	0.0313829
Sppl3	-0.446843	0.00393321	0.0313829
Tst	-0.499761	0.00393321	0.0313829
Jund	-0.426686	0.00393572	0.0313829
Ilkap	-0.522304	0.00393616	0.0313829
Mrpl12	-0.549978	0.00400357	0.0317976
Zfr	-0.711876	0.00405883	0.0321129
Khdc4	-0.477358	0.004149	0.0327011
Csnk1e	-0.387682	0.00418856	0.0328873
Cdkn1c	0.765191	0.00422081	0.0328983
BC004004	-0.480476	0.00422721	0.0328983
Gpbp1	-0.423575	0.00423774	0.0328983
Mrps21	-0.481098	0.00429215	0.0331958
Prdx5	-0.535803	0.00433596	0.0333852
Ctbp2	-0.472961	0.00434896	0.0333852
Filip1l	-0.609703	0.0044605	0.0340941
Tor1aip1	-0.624815	0.0044812	0.0340941
Pgk1	-0.516332	0.00449902	0.0340941
Rpl18	0.466197	0.00454114	0.0340941
Nfkb1	-0.706769	0.00455147	0.0340941
Elob	-0.454163	0.00456493	0.0340941
Car2	-0.985728	0.00458945	0.0340941
Rassf1	-0.481323	0.00459751	0.0340941
H2afy	-0.635677	0.00460499	0.0340941
Nsmce4a	-0.516585	0.00461976	0.0340941
Acbd6	-0.365337	0.00462293	0.0340941
Nudt4	-0.350456	0.00474178	0.0348461
Denr	-0.343543	0.00479215	0.0349872
Smim19	-0.494995	0.00479485	0.0349872
BC064078	-0.530421	0.0048132	0.0349974
Arih1	-0.422398	0.00485608	0.0351853
Rhoc	-0.537241	0.00488297	0.0351867
BC100530	-1.22362	0.00489353	0.0351867
Tnks2	-0.575031	0.0049074	0.0351867
Cnih4	-0.539955	0.00494527	0.0352432
Canx	-0.307854	0.00494941	0.0352432
Actr1a	-0.514889	0.00502658	0.0356697
Spop	-0.384023	0.0050553	0.0357507
Hdgf	-0.474155	0.00508983	0.035872
Bola1	-0.437766	0.00512343	0.035986
H2afx	-0.557161	0.00518014	0.0361776
Fkbp4	-0.546111	0.00519896	0.0361776
Acly	-0.516934	0.00520326	0.0361776
Maoa	0.600416	0.00525968	0.0363336
Adipor2	-0.429004	0.00526089	0.0363336
Mapk1ip1l	-0.526122	0.00528851	0.0364026
Lamtor1	-0.508211	0.00531102	0.0364361
1110008P14Rik	-0.412006	0.00532869	0.0364363
Slc25a4	-0.476087	0.00534849	0.0364509
Ptk2	-0.554979	0.00539278	0.0365103
Ei24	-0.361018	0.00539868	0.0365103
Lmo7	-0.4604	0.00542156	0.0365103
Jmjd1c	-0.537884	0.0054302	0.0365103
Akirin2	-0.534309	0.00544561	0.0365103
Ssr1	-0.640882	0.00552462	0.0369202
Uqcr11	-0.416365	0.0055614	0.0369757
Rpia	-0.520551	0.00558664	0.0369757
Sec63	-0.506682	0.00558664	0.0369757
Nme1	-0.550534	0.00563379	0.0371686
Ndufb7	-0.619184	0.00566784	0.0372742
Arpc4	-0.478696	0.0057161	0.0374722
Calm3	-0.307018	0.00576116	0.0376481
Dbi	-0.46732	0.00582842	0.0379096
Znrf1	-0.516574	0.00584542	0.0379096
Tsc22d2	-0.527757	0.00585626	0.0379096
Lig1	-0.649701	0.00595176	0.0384074
Cdk6	-0.284746	0.00597784	0.0384556
Mpv17l2	-0.388658	0.0060766	0.0387879
Ssrp1	-0.547895	0.00611374	0.0387879
Cib1	-0.483109	0.00612286	0.0387879
Ube2n	-0.388518	0.00613936	0.0387879
Stmn1	-1.08628	0.0061411	0.0387879
Atrx	-0.557145	0.00614356	0.0387879
Ehf	-0.520678	0.00617267	0.0387879
Bri3	-0.519293	0.00619036	0.0387879
Paip1	-0.28233	0.00619855	0.0387879
Chchd10	-0.562681	0.00624921	0.0389868
Nucks1	-0.38156	0.00632736	0.0392963
Top2a	-0.744065	0.00635662	0.0392963
Smc4	-0.430241	0.00636879	0.0392963
Tceal9	-0.336279	0.00640776	0.0392963
Magt1	-0.51206	0.00641632	0.0392963
Qsox1	-0.520939	0.00643174	0.0392963
Atp6v1g1	-0.42041	0.00645878	0.0392963
Zfp91	-0.483889	0.00646265	0.0392963
Cotl1	-0.663597	0.00647009	0.0392963
Zbtb21	-0.563606	0.00650716	0.0393055
Rtn3	-0.565613	0.00651553	0.0393055
Psme4	-0.412773	0.00652871	0.0393055
Golph3	-0.610508	0.00657814	0.039488
Mrpl34	-0.465324	0.00661105	0.0395705
mt-Nd2	-0.359895	0.0066304	0.0395716
Gsk3b	-0.621838	0.00669139	0.0397361
Skp1a	-0.455086	0.00675124	0.0397361
Fam162a	-0.641295	0.00675428	0.0397361
Tmem183a	-0.438619	0.00676173	0.0397361
Ppp1ca	-0.38481	0.00677191	0.0397361
Sae1	-0.395262	0.00677341	0.0397361
Mat2a	0.526687	0.00693777	0.0405657
Rpl15	-0.307295	0.00695885	0.0405657
Sparc	-0.666765	0.00698914	0.0405657
H2-K1	0.326125	0.00700906	0.0405657
Mllt3	-0.451524	0.00701305	0.0405657
Lsm6	-0.408743	0.0070566	0.0407036
Cdkn1a	0.605898	0.00709974	0.0408383
Fhl3	-0.639264	0.00719578	0.0412758
Trappc1	-0.421934	0.00725483	0.0414313
Gtf2i	-0.522505	0.00728175	0.0414313
Man1a2	-0.571367	0.00728307	0.0414313
Nbdy	-0.327279	0.00743215	0.0420357
Lrrc8a	-0.429681	0.00743563	0.0420357
Selenot	-0.470526	0.00748797	0.0420357
Atp11a	-0.331093	0.00750118	0.0420357
H2-T22	-0.45686	0.00751811	0.0420357
Igsf8	-0.457701	0.00753182	0.0420357
Dpp8	-0.4358	0.00753182	0.0420357
Creb5	-0.518452	0.00755444	0.0420483
Pcif1	-0.466087	0.00762026	0.0423007
Smndc1	-0.472459	0.00767083	0.0424672
St14	-0.334526	0.00771965	0.0426232
Ccnd2	-0.72208	0.00774609	0.0426375
Psenen	-0.445377	0.00777434	0.0426375
Slfn5	-0.488685	0.00778419	0.0426375
Zmiz1	-0.346794	0.00784884	0.0428779
Arpc1a	-0.502853	0.00787851	0.0429265
Tet3	-0.426861	0.00793728	0.0430672
Ap2b1	-0.256702	0.00794606	0.0430672
Naa20	-0.570962	0.00800741	0.0432222
Trappc2l	-0.412665	0.00804383	0.0432222
Zbtb8os	-0.468427	0.00808739	0.0432222
Ncor2	-0.40765	0.00808739	0.0432222
Ccdc25	-0.454121	0.00808739	0.0432222
Nupr1	-1.38504	0.00810024	0.0432222
Cd24a	-0.359523	0.00816977	0.043384
Bod1	-0.466154	0.00819724	0.043384
Lamtor2	-0.436169	0.00820542	0.043384
Ttc3	-0.596026	0.00821461	0.043384
Ndufb8	-0.424364	0.00824422	0.0434294
Tram1	-0.258731	0.00831301	0.0436803
Uqcrq	-0.432152	0.00842398	0.0440572
Abcd3	-0.611174	0.0084274	0.0440572
Tomm40	-0.608588	0.00846447	0.0441392
Fgfr1op2	-0.549606	0.00854439	0.0443785
Map3k20	-0.313196	0.00857462	0.0443785
Cenpw	-0.395342	0.00858288	0.0443785
Fubp1	-0.510619	0.00861381	0.0443785
Sys1	-0.404403	0.00865012	0.0443785
Polr2a	-0.476016	0.0086594	0.0443785
Tpm3-rs7	-0.337859	0.00868228	0.0443785
Prpf8	-0.395497	0.00868228	0.0443785
Elf1	-0.414344	0.00875787	0.0446543
Marf1	-0.474102	0.00881033	0.0447316
Agfg1	-0.369337	0.00881635	0.0447316
Ssbp4	-0.460492	0.00888784	0.0448307
Xrn2	-0.518835	0.0089034	0.0448307
4930523C07Rik	-0.541701	0.00890412	0.0448307
Dag1	-0.35077	0.00892272	0.0448307
Phf3	-0.423353	0.00898543	0.0450362
Snrpe	-0.426821	0.00902754	0.0450586
Wbp2	-0.444669	0.00904447	0.0450586
Grip2	-0.40219	0.00905537	0.0450586
Serinc3	-0.615092	0.00908972	0.0451209
Tmem87a	-0.477772	0.00911375	0.0451317
Aes	-0.501023	0.00918306	0.0453187
Ptgfrn	-0.413712	0.00919936	0.0453187
Ahnak	-0.422518	0.00923113	0.0453187
Tpp2	-0.420758	0.00923931	0.0453187
Eps8	-0.386957	0.00931918	0.045559
Lsm3	-0.515811	0.00933242	0.045559
Bzw2	-0.444552	0.00936405	0.0456056
A130010J15Rik	-0.566625	0.0093872	0.0456107
Ccng1	-0.544127	0.00943242	0.0456589
Prdx4	-0.320652	0.00944134	0.0456589
Pole3	-0.303211	0.009499	0.045808
Fosl2	-0.329812	0.00953665	0.045808
Impad1	-0.440581	0.00956089	0.045808
Sall3	-0.492019	0.00956089	0.045808
Fgfr2	-0.524216	0.00967826	0.0461829
Cxcl2	-0.388885	0.00968388	0.0461829
Snf8	-0.370109	0.00972202	0.046258
Brd3	-0.374279	0.00976311	0.0462614
Baz2b	-0.370649	0.00977065	0.0462614
Atp1b3	-0.425417	0.00980578	0.0462614
Rpl10a	-0.27565	0.00981235	0.0462614
Hyi	0.547473	0.00990349	0.0465848
Syne2	-0.467736	0.00997221	0.0466883
Srebf2	-0.459638	0.0100142	0.0466883
Itga2	-0.604741	0.0100142	0.0466883
Hif1a	-0.457517	0.0100159	0.0466883
Ube2k	-0.463564	0.0101708	0.0473032
Txndc17	-0.360562	0.010241	0.047492
Rnf4	-0.519993	0.010262	0.047492
Pdap1	-0.487817	0.0102803	0.047492
Ldha	-0.467024	0.0103728	0.0478121
Picalm	-0.563739	0.0105023	0.0483014
Pclaf	-0.987583	0.0106215	0.0483817
Mettl9	-0.452979	0.0106286	0.0483817
Atad2	-0.386013	0.0106507	0.0483817
Synj2bp	-0.472265	0.0106724	0.0483817
Vps53	0.456514	0.0106804	0.0483817
Tmem258	-0.416099	0.0106957	0.0483817
Rps15a	0.339673	0.0107054	0.0483817
Creb1	-0.409613	0.0107307	0.0483817
Amotl2	-0.457171	0.0107307	0.0483817
Mprip	-0.485628	0.0108426	0.0486716
Pin1	-0.506681	0.0108449	0.0486716
Ctbp1	-0.475692	0.0108657	0.0486716
Rab5c	-0.382509	0.0108978	0.0487098
Klf7	-0.532733	0.0109314	0.0487143
Exosc2	-0.434083	0.010946	0.0487143
Ube2l3	-0.451543	0.011021	0.0489426
Tsr2	0.395707	0.011062	0.0490067
Exoc4	-0.444516	0.0110972	0.0490067
Ryk	-0.413638	0.0111066	0.0490067
Sipa1l1	-0.433508	0.0111319	0.0490135
Rnpc3	0.380581	0.0112621	0.0494812
Atp6v1e1	-0.422511	0.0113177	0.0496187
Trp53i11	-0.478792	0.0113414	0.0496187
Atp5g3	-0.528641	0.0113927	0.0496272
App	0.518418	0.0114185	0.0496272
Mcrs1	-0.369379	0.0114485	0.0496272
Ubl4a	-0.347052	0.0114603	0.0496272
Atxn2	-0.383159	0.0114988	0.0496272
Coro1c	-0.358952	0.0115116	0.0496272
Setd1b	-0.422704	0.0115116	0.0496272
Man2b1	-0.313851	0.0116324	0.0499926
Ubxn8	-0.338732	0.0116448	0.0499926

## Sheet: S5C CellphoneDB PTEN cx + 4EBP1
pair	clusters	pvalue	mean
KLRG2_WNT5B	B-cells|Basal	1	-0.0320936
CADM1_CADM1	B-cells|Basal	1	-0.378944
SPP1_CD44	B-cells|Basal	1	-0.107803
LGALS9_CD44	B-cells|Basal	1	-0.268817
FGF1_FGFR1	B-cells|Basal	1	-0.242977
FGF1_FGFR2	B-cells|Basal	1	0.147958
CD44_FGFR2	B-cells|Basal	1	0.0398403
FGFR1_FGFR2	B-cells|Basal	1	0.265437
SPP1_PTGER4	B-cells|Basal	1	-0.109359
LAMP1_FAM3C	B-cells|Basal	1	-0.251539
EGFR_TGFA	B-cells|Basal	1	-0.139236
EGFR_MIF	B-cells|Basal	1	0.259423
CD74_MIF	B-cells|Basal	0.0009	1.3115
EGFR_AREG	B-cells|Basal	1	-0.0649175
ICAM1_AREG	B-cells|Basal	1	-0.0679388
EGFR_GRN	B-cells|Basal	1	-0.490051
TNFRSF1A_GRN	B-cells|Basal	1	-0.671164
EGFR_BTC	B-cells|Basal	1	-0.251539
ERBB3_BTC	B-cells|Basal	1	-0.222633
EGFR_COPA	B-cells|Basal	1	-0.275786
CD74_COPA	B-cells|Basal	0.0009	1.07793
EGFR_EPGN	B-cells|Basal	1	0.0551957
EGFR_HBEGF	B-cells|Basal	1	0.365133
CD44_HBEGF	B-cells|Basal	1	0.228973
CCL3_IDE	B-cells|Basal	1	-0.270556
GRN_SORT1	B-cells|Basal	1	-0.597278
COPA_SORT1	B-cells|Basal	1	-0.397828
CD200_CD200R1	B-cells|Basal	1	-0.0573917
TNF_DAG1	B-cells|Basal	1	-0.123434
LGALS9_DAG1	B-cells|Basal	1	-0.22095
TNF_NOTCH1	B-cells|Basal	1	-0.0908029
TNF_TNFRSF1A	B-cells|Basal	1	-0.177882
TNF_FAS	B-cells|Basal	1	-0.145605
TNF_CELSR2	B-cells|Basal	1	-0.0409718
CXCL1_CXCR1	B-cells|Basal	1	-0.106249
CXCL2_CXCR1	B-cells|Basal	1	-0.232769
PPBP_CXCR1	B-cells|Basal	1	-0.0350469
CXCL3_CXCR1	B-cells|Basal	1	-0.232769
CXCL1_CXCR2	B-cells|Basal	1	-0.106249
CXCL2_CXCR2	B-cells|Basal	1	-0.232769
PPBP_CXCR2	B-cells|Basal	1	-0.0350469
CXCL3_CXCR2	B-cells|Basal	1	-0.232769
LGALS9_MET	B-cells|Basal	1	-0.121863
LGALS9_CD47	B-cells|Basal	1	-0.514573
LGALS9_PTPRK	B-cells|Basal	1	-0.304006
WNT5A_PTPRK	B-cells|Basal	1	-0.0954196
LGALS9_COLEC12	B-cells|Basal	1	-0.268817
LGALS9_SORL1	B-cells|Basal	1	-0.316528
MDK_SORL1	B-cells|Basal	1	-0.161653
TNFRSF11B_TNFSF10	B-cells|Basal	1	-0.226004
FGFR2_EPHA4	B-cells|Basal	1	-0.0528949
EFNA1_EPHA4	B-cells|Basal	1	-0.158429
EFNA4_EPHA4	B-cells|Basal	1	0.0186342
EFNA5_EPHA4	B-cells|Basal	1	-0.0335695
EFNB2_EPHA4	B-cells|Basal	1	-0.176251
WNT7B_FZD4	B-cells|Basal	1	-0.244685
PLXNB2_PTN	B-cells|Basal	1	0.232661
PLXNB2_SEMA4D	B-cells|Basal	1	-0.45799
MIF_TNFRSF10D	B-cells|Basal	1	-0.547932
EFNA1_EPHA1	B-cells|Basal	1	-0.174621
EFNA1_EPHA2	B-cells|Basal	1	0.0285692
CXCR6_CXCL16	B-cells|Basal	1	-0.115597
EREG_EGFR	B-cells|Basal	1	0.00863031
PLD2_ARF1	B-cells|Basal	1	-0.0679388
EPHB2_EFNB2	B-cells|Basal	1	-0.07552
EPHB2_EFNB1	B-cells|Basal	1	0.0962619
EPHB3_EFNB1	B-cells|Basal	1	-0.0247367
EPHB4_EFNB1	B-cells|Basal	1	0.0299829
EPHA4_EFNB1	B-cells|Basal	1	-0.0573917
EFNB2_EPHB4	B-cells|Basal	1	-0.284546
EPHB2_EFNA5	B-cells|Basal	1	0.140124
EPHA1_EFNA5	B-cells|Basal	1	0.0243197
EPHA2_EFNA5	B-cells|Basal	1	-0.189351
EFNB2_EPHB3	B-cells|Basal	1	-0.182786
EPHA1_EFNA4	B-cells|Basal	1	-0.150401
EPHA2_EFNA4	B-cells|Basal	1	-0.395929
CEACAM1_CEACAM8	B-cells|Basal	1	-0.988504
FZD6_WNT5A	B-cells|Basal	1	-0.112475
LRP6_CKLF	B-cells|Basal	1	-0.136062
CXCR1_CXCL5	B-cells|Basal	1	-0.152003
CXCR2_CXCL5	B-cells|Basal	1	-0.152003
CXCR1_YARS	B-cells|Basal	1	0.0328061
CXCR1_CXCL6	B-cells|Basal	1	-0.152003
CXCR2_CXCL6	B-cells|Basal	1	-0.152003
IL15_IL15RA	B-cells|Basal	1	-0.112475
LTBR_LTB	B-cells|Basal	1	-0.424688
DSG2_DSC3	B-cells|Basal	1	0.309176
DSC2_DSG2	B-cells|Basal	1	-0.0350469
KLRG2_WNT5B	B-cells|CD8	1	-0.192645
CADM1_CADM1	B-cells|CD8	1	-0.778432
SPP1_CD44	B-cells|CD8	1	-0.516636
LGALS9_CD44	B-cells|CD8	1	-0.734563
FGF1_FGFR1	B-cells|CD8	1	-0.426625
FGF1_FGFR2	B-cells|CD8	1	-0.450084
CD44_FGFR2	B-cells|CD8	1	-0.614845
FGFR1_FGFR2	B-cells|CD8	1	-0.275786
SPP1_PTGER4	B-cells|CD8	1	-0.291592
LAMP1_FAM3C	B-cells|CD8	1	-0.659723
EGFR_TGFA	B-cells|CD8	1	-0.295128
EGFR_MIF	B-cells|CD8	1	-0.664288
CD74_MIF	B-cells|CD8	0.0009	0.938098
EGFR_AREG	B-cells|CD8	1	-0.494109
ICAM1_AREG	B-cells|CD8	1	-0.498179
EGFR_GRN	B-cells|CD8	1	-0.78339
TNFRSF1A_GRN	B-cells|CD8	1	-1.00868
EGFR_BTC	B-cells|CD8	1	-0.244685
ERBB3_BTC	B-cells|CD8	1	-0.21424
EGFR_COPA	B-cells|CD8	1	-0.448115
CD74_COPA	B-cells|CD8	1	1.01293
EGFR_EPGN	B-cells|CD8	1	-0.275786
EGFR_HBEGF	B-cells|CD8	1	-1.18771
CD44_HBEGF	B-cells|CD8	1	-1.63039
CCL3_IDE	B-cells|CD8	1	-0.356606
GRN_SORT1	B-cells|CD8	1	-0.75877
COPA_SORT1	B-cells|CD8	1	-0.537424
CD200_CD200R1	B-cells|CD8	1	-0.181149
TNF_DAG1	B-cells|CD8	1	-0.597278
LGALS9_DAG1	B-cells|CD8	1	-0.732165
TNF_NOTCH1	B-cells|CD8	1	-0.405451
TNF_TNFRSF1A	B-cells|CD8	1	-0.415037
TNF_FAS	B-cells|CD8	1	-0.215915
TNF_CELSR2	B-cells|CD8	1	-0.37707
CXCL1_CXCR1	B-cells|CD8	1	-0.118727
CXCL2_CXCR1	B-cells|CD8	1	-0.246395
PPBP_CXCR1	B-cells|CD8	1	-0.046921
CXCL3_CXCR1	B-cells|CD8	1	-0.246395
CXCL1_CXCR2	B-cells|CD8	1	-0.118727
CXCL2_CXCR2	B-cells|CD8	1	-0.246395
PPBP_CXCR2	B-cells|CD8	1	-0.046921
CXCL3_CXCR2	B-cells|CD8	1	-0.246395
LGALS9_MET	B-cells|CD8	1	-0.603841
LGALS9_CD47	B-cells|CD8	1	-0.272297
LGALS9_PTPRK	B-cells|CD8	1	-0.655172
WNT5A_PTPRK	B-cells|CD8	1	-0.394032
LGALS9_COLEC12	B-cells|CD8	1	-0.498179
LGALS9_SORL1	B-cells|CD8	1	-0.415037
MDK_SORL1	B-cells|CD8	1	-0.249822
TNFRSF11B_TNFSF10	B-cells|CD8	1	-0.0816138
FGFR2_EPHA4	B-cells|CD8	1	-0.413115
EFNA1_EPHA4	B-cells|CD8	1	-0.550043
EFNA4_EPHA4	B-cells|CD8	1	-0.321928
EFNA5_EPHA4	B-cells|CD8	1	-0.388355
EFNB2_EPHA4	B-cells|CD8	1	-0.573467
WNT7B_FZD4	B-cells|CD8	1	-0.352916
PLXNB2_PTN	B-cells|CD8	1	-0.550043
PLXNB2_SEMA4D	B-cells|CD8	1	-0.288065
MIF_TNFRSF10D	B-cells|CD8	1	-0.675765
EFNA1_EPHA1	B-cells|CD8	1	-0.473931
EFNA1_EPHA2	B-cells|CD8	1	-0.808437
CXCR6_CXCL16	B-cells|CD8	1	-0.567041
EREG_EGFR	B-cells|CD8	1	-0.268817
PLD2_ARF1	B-cells|CD8	1	-0.494109
EPHB2_EFNB2	B-cells|CD8	1	-0.343732
EPHB2_EFNB1	B-cells|CD8	1	-0.251539
EPHB3_EFNB1	B-cells|CD8	1	-0.407364
EPHB4_EFNB1	B-cells|CD8	1	-0.336428
EPHA4_EFNB1	B-cells|CD8	1	-0.448115
EFNB2_EPHB4	B-cells|CD8	1	-0.450084
EPHB2_EFNA5	B-cells|CD8	1	-0.1976
EPHA1_EFNA5	B-cells|CD8	1	-0.347399
EPHA2_EFNA5	B-cells|CD8	1	-0.630394
EFNB2_EPHB3	B-cells|CD8	1	-0.510457
EPHA1_EFNA4	B-cells|CD8	1	-0.2567
EPHA2_EFNA4	B-cells|CD8	1	-0.522841
CEACAM1_CEACAM8	B-cells|CD8	1	-1.24469
FZD6_WNT5A	B-cells|CD8	1	-0.289827
LRP6_CKLF	B-cells|CD8	1	-0.0365259
CXCR1_CXCL5	B-cells|CD8	1	-0.272297
CXCR2_CXCL5	B-cells|CD8	1	-0.272297
CXCR1_YARS	B-cells|CD8	1	-0.0664274
CXCR1_CXCL6	B-cells|CD8	1	-0.272297
CXCR2_CXCL6	B-cells|CD8	1	-0.272297
IL15_IL15RA	B-cells|CD8	1	-0.199255
LTBR_LTB	B-cells|CD8	1	0.603122
DSG2_DSC3	B-cells|CD8	1	-0.325539
DSC2_DSG2	B-cells|CD8	1	-0.327348
KLRG2_WNT5B	B-cells|DC	1	-0.192645
CADM1_CADM1	B-cells|DC	1	-0.446148
SPP1_CD44	B-cells|DC	1	-0.305788
LGALS9_CD44	B-cells|DC	1	-0.490051
FGF1_FGFR1	B-cells|DC	1	-0.42082
FGF1_FGFR2	B-cells|DC	1	-0.475936
CD44_FGFR2	B-cells|DC	1	-0.643856
FGFR1_FGFR2	B-cells|DC	1	-0.296899
SPP1_PTGER4	B-cells|DC	1	0.121679
LAMP1_FAM3C	B-cells|DC	1	-0.72738
EGFR_TGFA	B-cells|DC	1	-0.325539
EGFR_MIF	B-cells|DC	1	-0.584241
CD74_MIF	B-cells|DC	0.0009	0.964953
EGFR_AREG	B-cells|DC	1	-0.365871
ICAM1_AREG	B-cells|DC	1	-0.369595
EGFR_GRN	B-cells|DC	1	-0.21424
TNFRSF1A_GRN	B-cells|DC	1	-0.362158
EGFR_BTC	B-cells|DC	1	-0.309359
ERBB3_BTC	B-cells|DC	1	-0.279284
EGFR_COPA	B-cells|DC	1	-0.365871
CD74_COPA	B-cells|DC	0.0009	1.04334
EGFR_EPGN	B-cells|DC	1	-0.275786
EGFR_HBEGF	B-cells|DC	1	-1.16812
CD44_HBEGF	B-cells|DC	1	-1.60823
CCL3_IDE	B-cells|DC	1	-0.360305
GRN_SORT1	B-cells|DC	1	-0.550043
COPA_SORT1	B-cells|DC	1	-0.356606
CD200_CD200R1	B-cells|DC	1	-0.114035
TNF_DAG1	B-cells|DC	1	-0.560643
LGALS9_DAG1	B-cells|DC	1	-0.694321
TNF_NOTCH1	B-cells|DC	1	-0.41889
TNF_TNFRSF1A	B-cells|DC	1	-0.07552
TNF_FAS	B-cells|DC	1	-0.1976
TNF_CELSR2	B-cells|DC	1	-0.367732
CXCL1_CXCR1	B-cells|DC	1	-0.145605
CXCL2_CXCR1	B-cells|DC	1	-0.275786
PPBP_CXCR1	B-cells|DC	1	-0.0724828
CXCL3_CXCR1	B-cells|DC	1	-0.275786
CXCL1_CXCR2	B-cells|DC	1	-0.145605
CXCL2_CXCR2	B-cells|DC	1	-0.275786
PPBP_CXCR2	B-cells|DC	1	-0.0724828
CXCL3_CXCR2	B-cells|DC	1	-0.275786
LGALS9_MET	B-cells|DC	1	-0.573467
LGALS9_CD47	B-cells|DC	1	0.202888
LGALS9_PTPRK	B-cells|DC	1	-0.655172
WNT5A_PTPRK	B-cells|DC	1	-0.394032
LGALS9_COLEC12	B-cells|DC	1	-0.533242
LGALS9_SORL1	B-cells|DC	1	-0.588574
MDK_SORL1	B-cells|DC	1	-0.403542
TNFRSF11B_TNFSF10	B-cells|DC	1	-0.234465
FGFR2_EPHA4	B-cells|DC	1	-0.395929
EFNA1_EPHA4	B-cells|DC	1	-0.531156
EFNA4_EPHA4	B-cells|DC	1	-0.305788
EFNA5_EPHA4	B-cells|DC	1	-0.37146
EFNB2_EPHA4	B-cells|DC	1	-0.554273
WNT7B_FZD4	B-cells|DC	1	-0.295128
PLXNB2_PTN	B-cells|DC	1	-0.529073
PLXNB2_SEMA4D	B-cells|DC	1	-0.289827
MIF_TNFRSF10D	B-cells|DC	1	-0.599462
EFNA1_EPHA1	B-cells|DC	1	-0.436354
EFNA1_EPHA2	B-cells|DC	1	-0.736966
CXCR6_CXCL16	B-cells|DC	1	0.52707
EREG_EGFR	B-cells|DC	1	-0.258425
PLD2_ARF1	B-cells|DC	1	-0.189351
EPHB2_EFNB2	B-cells|DC	1	-0.341903
EPHB2_EFNB1	B-cells|DC	1	-0.251539
EPHB3_EFNB1	B-cells|DC	1	-0.407364
EPHB4_EFNB1	B-cells|DC	1	-0.336428
EPHA4_EFNB1	B-cells|DC	1	-0.448115
EFNB2_EPHB4	B-cells|DC	1	-0.450084
EPHB2_EFNA5	B-cells|DC	1	-0.1976
EPHA1_EFNA5	B-cells|DC	1	-0.347399
EPHA2_EFNA5	B-cells|DC	1	-0.630394
EFNB2_EPHB3	B-cells|DC	1	-0.506353
EPHA1_EFNA4	B-cells|DC	1	-0.28279
EPHA2_EFNA4	B-cells|DC	1	-0.552156
CEACAM1_CEACAM8	B-cells|DC	1	-1.16165
FZD6_WNT5A	B-cells|DC	1	-0.289827
LRP6_CKLF	B-cells|DC	1	0.140124
CXCR1_CXCL5	B-cells|DC	1	-0.289827
CXCR2_CXCL5	B-cells|DC	1	-0.289827
CXCR1_YARS	B-cells|DC	1	-0.0679388
CXCR1_CXCL6	B-cells|DC	1	-0.289827
CXCR2_CXCL6	B-cells|DC	1	-0.289827
IL15_IL15RA	B-cells|DC	1	-0.0573917
LTBR_LTB	B-cells|DC	1	-0.136062
DSG2_DSC3	B-cells|DC	1	-0.360305
DSC2_DSG2	B-cells|DC	1	-0.362158
KLRG2_WNT5B	B-cells|Delta-Gamma	1	-0.117161
CADM1_CADM1	B-cells|Delta-Gamma	1	-0.778432
SPP1_CD44	B-cells|Delta-Gamma	1	-0.401635
LGALS9_CD44	B-cells|Delta-Gamma	1	-0.599462
FGF1_FGFR1	B-cells|Delta-Gamma	1	-0.409278
FGF1_FGFR2	B-cells|Delta-Gamma	1	-0.475936
CD44_FGFR2	B-cells|Delta-Gamma	1	-0.643856
FGFR1_FGFR2	B-cells|Delta-Gamma	1	-0.296899
SPP1_PTGER4	B-cells|Delta-Gamma	1	-0.309359
LAMP1_FAM3C	B-cells|Delta-Gamma	1	-0.83908
EGFR_TGFA	B-cells|Delta-Gamma	1	-0.360305
EGFR_MIF	B-cells|Delta-Gamma	1	-0.606035
CD74_MIF	B-cells|Delta-Gamma	0.0009	0.957543
EGFR_AREG	B-cells|Delta-Gamma	1	-0.123434
ICAM1_AREG	B-cells|Delta-Gamma	1	-0.12658
EGFR_GRN	B-cells|Delta-Gamma	1	-0.698998
TNFRSF1A_GRN	B-cells|Delta-Gamma	1	-0.910502
EGFR_BTC	B-cells|Delta-Gamma	1	-0.351074
ERBB3_BTC	B-cells|Delta-Gamma	1	-0.318326
EGFR_COPA	B-cells|Delta-Gamma	1	-0.610433
CD74_COPA	B-cells|Delta-Gamma	1	0.9568
EGFR_EPGN	B-cells|Delta-Gamma	1	-0.275786
EGFR_HBEGF	B-cells|Delta-Gamma	1	-1.11716
CD44_HBEGF	B-cells|Delta-Gamma	1	-1.53952
CCL3_IDE	B-cells|Delta-Gamma	1	-0.395929
GRN_SORT1	B-cells|Delta-Gamma	1	-0.75877
COPA_SORT1	B-cells|Delta-Gamma	1	-0.537424
CD200_CD200R1	B-cells|Delta-Gamma	1	-0.12658
TNF_DAG1	B-cells|Delta-Gamma	1	-0.603841
LGALS9_DAG1	B-cells|Delta-Gamma	1	-0.741783
TNF_NOTCH1	B-cells|Delta-Gamma	1	-0.272297
TNF_TNFRSF1A	B-cells|Delta-Gamma	1	-0.00578235
TNF_FAS	B-cells|Delta-Gamma	1	-0.272297
TNF_CELSR2	B-cells|Delta-Gamma	1	-0.340075
CXCL1_CXCR1	B-cells|Delta-Gamma	1	-0.171368
CXCL2_CXCR1	B-cells|Delta-Gamma	1	-0.305788
PPBP_CXCR1	B-cells|Delta-Gamma	1	-0.0985055
CXCL3_CXCR1	B-cells|Delta-Gamma	1	-0.305788
CXCL1_CXCR2	B-cells|Delta-Gamma	1	-0.171368
CXCL2_CXCR2	B-cells|Delta-Gamma	1	-0.305788
PPBP_CXCR2	B-cells|Delta-Gamma	1	-0.0985055
CXCL3_CXCR2	B-cells|Delta-Gamma	1	-0.305788
LGALS9_MET	B-cells|Delta-Gamma	1	-0.603841
LGALS9_CD47	B-cells|Delta-Gamma	1	-0.454032
LGALS9_PTPRK	B-cells|Delta-Gamma	1	-0.617056
WNT5A_PTPRK	B-cells|Delta-Gamma	1	-0.362158
LGALS9_COLEC12	B-cells|Delta-Gamma	1	-0.477944
LGALS9_SORL1	B-cells|Delta-Gamma	1	-0.413115
MDK_SORL1	B-cells|Delta-Gamma	1	-0.249822
TNFRSF11B_TNFSF10	B-cells|Delta-Gamma	1	-0.286304
FGFR2_EPHA4	B-cells|Delta-Gamma	1	-0.413115
EFNA1_EPHA4	B-cells|Delta-Gamma	1	-0.550043
EFNA4_EPHA4	B-cells|Delta-Gamma	1	-0.321928
EFNA5_EPHA4	B-cells|Delta-Gamma	1	-0.388355
EFNB2_EPHA4	B-cells|Delta-Gamma	1	-0.573467
WNT7B_FZD4	B-cells|Delta-Gamma	1	-0.352916
PLXNB2_PTN	B-cells|Delta-Gamma	1	-0.550043
PLXNB2_SEMA4D	B-cells|Delta-Gamma	1	-0.284546
MIF_TNFRSF10D	B-cells|Delta-Gamma	1	-0.579922
EFNA1_EPHA1	B-cells|Delta-Gamma	1	-0.50226
EFNA1_EPHA2	B-cells|Delta-Gamma	1	-0.821126
CXCR6_CXCL16	B-cells|Delta-Gamma	1	-0.608232
EREG_EGFR	B-cells|Delta-Gamma	1	-0.281036
PLD2_ARF1	B-cells|Delta-Gamma	1	-0.279284
EPHB2_EFNB2	B-cells|Delta-Gamma	1	-0.358454
EPHB2_EFNB1	B-cells|Delta-Gamma	1	-0.212568
EPHB3_EFNB1	B-cells|Delta-Gamma	1	-0.365871
EPHB4_EFNB1	B-cells|Delta-Gamma	1	-0.296899
EPHA4_EFNB1	B-cells|Delta-Gamma	1	-0.405451
EFNB2_EPHB4	B-cells|Delta-Gamma	1	-0.450084
EPHB2_EFNA5	B-cells|Delta-Gamma	1	-0.1976
EPHA1_EFNA5	B-cells|Delta-Gamma	1	-0.347399
EPHA2_EFNA5	B-cells|Delta-Gamma	1	-0.630394
EFNB2_EPHB3	B-cells|Delta-Gamma	1	-0.526992
EPHA1_EFNA4	B-cells|Delta-Gamma	1	-0.28279
EPHA2_EFNA4	B-cells|Delta-Gamma	1	-0.552156
CEACAM1_CEACAM8	B-cells|Delta-Gamma	1	-1.2109
FZD6_WNT5A	B-cells|Delta-Gamma	1	-0.289827
LRP6_CKLF	B-cells|Delta-Gamma	1	0.0579701
CXCR1_CXCL5	B-cells|Delta-Gamma	1	-0.316528
CXCR2_CXCL5	B-cells|Delta-Gamma	1	-0.316528
CXCR1_YARS	B-cells|Delta-Gamma	1	-0.07552
CXCR1_CXCL6	B-cells|Delta-Gamma	1	-0.316528
CXCR2_CXCL6	B-cells|Delta-Gamma	1	-0.316528
IL15_IL15RA	B-cells|Delta-Gamma	1	-0.226004
LTBR_LTB	B-cells|Delta-Gamma	1	0.620117
DSG2_DSC3	B-cells|Delta-Gamma	1	-0.360305
DSC2_DSG2	B-cells|Delta-Gamma	1	-0.279284
KLRG2_WNT5B	B-cells|Endothelial	1	-0.192645
CADM1_CADM1	B-cells|Endothelial	1	-0.650635
SPP1_CD44	B-cells|Endothelial	1	-0.529073
LGALS9_CD44	B-cells|Endothelial	1	-0.749038
FGF1_FGFR1	B-cells|Endothelial	1	-0.0262051
FGF1_FGFR2	B-cells|Endothelial	1	-0.415037
CD44_FGFR2	B-cells|Endothelial	1	-0.575615
FGFR1_FGFR2	B-cells|Endothelial	1	-0.242977
SPP1_PTGER4	B-cells|Endothelial	1	0.00863031
LAMP1_FAM3C	B-cells|Endothelial	1	-0.694321
EGFR_TGFA	B-cells|Endothelial	1	-0.360305
EGFR_MIF	B-cells|Endothelial	1	-0.648372
CD74_MIF	B-cells|Endothelial	0.0009	0.943359
EGFR_AREG	B-cells|Endothelial	1	-0.424688
ICAM1_AREG	B-cells|Endothelial	1	-0.428566
EGFR_GRN	B-cells|Endothelial	1	-0.659723
TNFRSF1A_GRN	B-cells|Endothelial	1	-0.865122
EGFR_BTC	B-cells|Endothelial	1	-0.351074
ERBB3_BTC	B-cells|Endothelial	1	-0.318326
EGFR_COPA	B-cells|Endothelial	1	-0.426625
CD74_COPA	B-cells|Endothelial	1	1.02077
EGFR_EPGN	B-cells|Endothelial	1	-0.275786
EGFR_HBEGF	B-cells|Endothelial	1	-0.469929
CD44_HBEGF	B-cells|Endothelial	1	-0.724993
CCL3_IDE	B-cells|Endothelial	1	-0.26708
GRN_SORT1	B-cells|Endothelial	1	-0.490051
COPA_SORT1	B-cells|Endothelial	1	-0.302226
CD200_CD200R1	B-cells|Endothelial	1	-0.139236
TNF_DAG1	B-cells|Endothelial	1	0.0579701
LGALS9_DAG1	B-cells|Endothelial	1	-0.027675
TNF_NOTCH1	B-cells|Endothelial	1	-0.284546
TNF_TNFRSF1A	B-cells|Endothelial	1	0.182692
TNF_FAS	B-cells|Endothelial	1	0.168642
TNF_CELSR2	B-cells|Endothelial	1	-0.407364
CXCL1_CXCR1	B-cells|Endothelial	1	0.0229004
CXCL2_CXCR1	B-cells|Endothelial	1	-0.0923402
PPBP_CXCR1	B-cells|Endothelial	1	0.0881416
CXCL3_CXCR1	B-cells|Endothelial	1	-0.0923402
CXCL1_CXCR2	B-cells|Endothelial	1	0.0229004
CXCL2_CXCR2	B-cells|Endothelial	1	-0.0923402
PPBP_CXCR2	B-cells|Endothelial	1	0.0881416
CXCL3_CXCR2	B-cells|Endothelial	1	-0.0923402
LGALS9_MET	B-cells|Endothelial	1	-0.603841
LGALS9_CD47	B-cells|Endothelial	1	-0.242977
LGALS9_PTPRK	B-cells|Endothelial	1	-0.42082
WNT5A_PTPRK	B-cells|Endothelial	1	-0.195946
LGALS9_COLEC12	B-cells|Endothelial	1	-0.150401
LGALS9_SORL1	B-cells|Endothelial	1	-0.708396
MDK_SORL1	B-cells|Endothelial	1	-0.508403
TNFRSF11B_TNFSF10	B-cells|Endothelial	1	-0.248108
FGFR2_EPHA4	B-cells|Endothelial	1	-0.0262051
EFNA1_EPHA4	B-cells|Endothelial	1	-0.129734
EFNA4_EPHA4	B-cells|Endothelial	1	0.0440443
EFNA5_EPHA4	B-cells|Endothelial	1	-0.00723157
EFNB2_EPHA4	B-cells|Endothelial	1	-0.147202
WNT7B_FZD4	B-cells|Endothelial	1	-0.352916
PLXNB2_PTN	B-cells|Endothelial	1	-0.550043
PLXNB2_SEMA4D	B-cells|Endothelial	1	-0.537424
MIF_TNFRSF10D	B-cells|Endothelial	1	-0.8863
EFNA1_EPHA1	B-cells|Endothelial	1	-0.275786
EFNA1_EPHA2	B-cells|Endothelial	1	-0.516636
CXCR6_CXCL16	B-cells|Endothelial	1	-0.467932
EREG_EGFR	B-cells|Endothelial	1	-0.281036
PLD2_ARF1	B-cells|Endothelial	1	-0.390245
EPHB2_EFNB2	B-cells|Endothelial	1	-0.132894
EPHB2_EFNB1	B-cells|Endothelial	1	0.0328061
EPHB3_EFNB1	B-cells|Endothelial	1	-0.093879
EPHB4_EFNB1	B-cells|Endothelial	1	-0.0380063
EPHA4_EFNB1	B-cells|Endothelial	1	-0.128156
EFNB2_EPHB4	B-cells|Endothelial	1	-0.450084
EPHB2_EFNA5	B-cells|Endothelial	1	-0.161653
EPHA1_EFNA5	B-cells|Endothelial	1	-0.305788
EPHA2_EFNA5	B-cells|Endothelial	1	-0.58208
EFNB2_EPHB3	B-cells|Endothelial	1	-0.526992
EPHA1_EFNA4	B-cells|Endothelial	1	-0.28279
EPHA2_EFNA4	B-cells|Endothelial	1	-0.552156
CEACAM1_CEACAM8	B-cells|Endothelial	1	-1.24469
FZD6_WNT5A	B-cells|Endothelial	1	-0.155213
LRP6_CKLF	B-cells|Endothelial	1	-0.234465
CXCR1_CXCL5	B-cells|Endothelial	1	-0.284546
CXCR2_CXCL5	B-cells|Endothelial	1	-0.284546
CXCR1_YARS	B-cells|Endothelial	1	0.107018
CXCR1_CXCL6	B-cells|Endothelial	1	-0.284546
CXCR2_CXCL6	B-cells|Endothelial	1	-0.284546
IL15_IL15RA	B-cells|Endothelial	1	0.0894982
LTBR_LTB	B-cells|Endothelial	1	-0.444184
DSG2_DSC3	B-cells|Endothelial	1	-0.360305
DSC2_DSG2	B-cells|Endothelial	1	-0.325539
KLRG2_WNT5B	B-cells|Fibroblasts	1	-0.0588937
CADM1_CADM1	B-cells|Fibroblasts	1	-0.641604
SPP1_CD44	B-cells|Fibroblasts	1	-0.612637
LGALS9_CD44	B-cells|Fibroblasts	1	-0.846843
FGF1_FGFR1	B-cells|Fibroblasts	1	0.473008
FGF1_FGFR2	B-cells|Fibroblasts	1	-0.428566
CD44_FGFR2	B-cells|Fibroblasts	1	-0.590745
FGFR1_FGFR2	B-cells|Fibroblasts	1	-0.254978
SPP1_PTGER4	B-cells|Fibroblasts	1	-0.209228
LAMP1_FAM3C	B-cells|Fibroblasts	1	-0.652901
EGFR_TGFA	B-cells|Fibroblasts	1	-0.336428
EGFR_MIF	B-cells|Fibroblasts	1	-0.836501
CD74_MIF	B-cells|Fibroblasts	0.0009	0.883621
EGFR_AREG	B-cells|Fibroblasts	1	-0.488026
ICAM1_AREG	B-cells|Fibroblasts	1	-0.492079
EGFR_GRN	B-cells|Fibroblasts	1	-0.463947
TNFRSF1A_GRN	B-cells|Fibroblasts	1	-0.641604
EGFR_BTC	B-cells|Fibroblasts	1	-0.298673
ERBB3_BTC	B-cells|Fibroblasts	1	-0.268817
EGFR_COPA	B-cells|Fibroblasts	1	-0.291592
CD74_COPA	B-cells|Fibroblasts	0.0009	1.07245
EGFR_EPGN	B-cells|Fibroblasts	1	-0.275786
EGFR_HBEGF	B-cells|Fibroblasts	1	-0.691989
CD44_HBEGF	B-cells|Fibroblasts	1	-0.99137
CCL3_IDE	B-cells|Fibroblasts	1	-0.364013
GRN_SORT1	B-cells|Fibroblasts	1	-0.701342
COPA_SORT1	B-cells|Fibroblasts	1	-0.486004
CD200_CD200R1	B-cells|Fibroblasts	1	-0.153607
TNF_DAG1	B-cells|Fibroblasts	1	-0.304006
LGALS9_DAG1	B-cells|Fibroblasts	1	-0.415037
TNF_NOTCH1	B-cells|Fibroblasts	1	-0.373327
TNF_TNFRSF1A	B-cells|Fibroblasts	1	0.0342157
TNF_FAS	B-cells|Fibroblasts	1	-0.215915
TNF_CELSR2	B-cells|Fibroblasts	1	-0.369595
CXCL1_CXCR1	B-cells|Fibroblasts	1	-0.182786
CXCL2_CXCR1	B-cells|Fibroblasts	1	-0.318326
PPBP_CXCR1	B-cells|Fibroblasts	1	-0.109359
CXCL3_CXCR1	B-cells|Fibroblasts	1	-0.318326
CXCL1_CXCR2	B-cells|Fibroblasts	1	-0.182786
CXCL2_CXCR2	B-cells|Fibroblasts	1	-0.318326
PPBP_CXCR2	B-cells|Fibroblasts	1	-0.109359
CXCL3_CXCR2	B-cells|Fibroblasts	1	-0.318326
LGALS9_MET	B-cells|Fibroblasts	1	-0.575615
LGALS9_CD47	B-cells|Fibroblasts	1	-0.0262051
LGALS9_PTPRK	B-cells|Fibroblasts	1	-0.554273
WNT5A_PTPRK	B-cells|Fibroblasts	1	-0.309359
LGALS9_COLEC12	B-cells|Fibroblasts	1	0.484396
LGALS9_SORL1	B-cells|Fibroblasts	1	-0.664288
MDK_SORL1	B-cells|Fibroblasts	1	-0.471929
TNFRSF11B_TNFSF10	B-cells|Fibroblasts	1	-0.217591
FGFR2_EPHA4	B-cells|Fibroblasts	1	-0.330973
EFNA1_EPHA4	B-cells|Fibroblasts	1	-0.45799
EFNA4_EPHA4	B-cells|Fibroblasts	1	-0.244685
EFNA5_EPHA4	B-cells|Fibroblasts	1	-0.307573
EFNB2_EPHA4	B-cells|Fibroblasts	1	-0.479955
WNT7B_FZD4	B-cells|Fibroblasts	1	-0.168123
PLXNB2_PTN	B-cells|Fibroblasts	1	0.214125
PLXNB2_SEMA4D	B-cells|Fibroblasts	1	-0.496142
MIF_TNFRSF10D	B-cells|Fibroblasts	1	-0.739372
EFNA1_EPHA1	B-cells|Fibroblasts	1	-0.380822
EFNA1_EPHA2	B-cells|Fibroblasts	1	-0.746616
CXCR6_CXCL16	B-cells|Fibroblasts	1	-0.384584
EREG_EGFR	B-cells|Fibroblasts	1	0
PLD2_ARF1	B-cells|Fibroblasts	1	-0.367732
EPHB2_EFNB2	B-cells|Fibroblasts	1	-0.330973
EPHB2_EFNB1	B-cells|Fibroblasts	1	-0.0365259
EPHB3_EFNB1	B-cells|Fibroblasts	1	-0.171368
EPHB4_EFNB1	B-cells|Fibroblasts	1	-0.110916
EPHA4_EFNB1	B-cells|Fibroblasts	1	-0.205896
EFNB2_EPHB4	B-cells|Fibroblasts	1	-0.309359
EPHB2_EFNA5	B-cells|Fibroblasts	1	-0.0923402
EPHA1_EFNA5	B-cells|Fibroblasts	1	-0.229382
EPHA2_EFNA5	B-cells|Fibroblasts	1	-0.490051
EFNB2_EPHB3	B-cells|Fibroblasts	1	-0.442222
EPHA1_EFNA4	B-cells|Fibroblasts	1	-0.22095
EPHA2_EFNA4	B-cells|Fibroblasts	1	-0.477944
CEACAM1_CEACAM8	B-cells|Fibroblasts	1	-1.22432
FZD6_WNT5A	B-cells|Fibroblasts	1	-0.027675
LRP6_CKLF	B-cells|Fibroblasts	1	-0.270556
CXCR1_CXCL5	B-cells|Fibroblasts	1	-0.2567
CXCR2_CXCL5	B-cells|Fibroblasts	1	-0.2567
CXCR1_YARS	B-cells|Fibroblasts	1	-0.0724828
CXCR1_CXCL6	B-cells|Fibroblasts	1	-0.2567
CXCR2_CXCL6	B-cells|Fibroblasts	1	-0.2567
IL15_IL15RA	B-cells|Fibroblasts	1	-0.0724828
LTBR_LTB	B-cells|Fibroblasts	1	-0.41889
DSG2_DSC3	B-cells|Fibroblasts	1	-0.336428
DSC2_DSG2	B-cells|Fibroblasts	1	-0.354759
KLRG2_WNT5B	B-cells|M2	1	-0.192645
CADM1_CADM1	B-cells|M2	1	-0.571322
SPP1_CD44	B-cells|M2	1	-0.424688
LGALS9_CD44	B-cells|M2	1	-0.628162
FGF1_FGFR1	B-cells|M2	1	-0.318326
FGF1_FGFR2	B-cells|M2	1	-0.380822
CD44_FGFR2	B-cells|M2	1	-0.53952
FGFR1_FGFR2	B-cells|M2	1	-0.21424
SPP1_PTGER4	B-cells|M2	1	-0.187707
LAMP1_FAM3C	B-cells|M2	1	-0.687335
EGFR_TGFA	B-cells|M2	1	-0.360305
EGFR_MIF	B-cells|M2	1	-1.04394
CD74_MIF	B-cells|M2	0.0009	0.824564
EGFR_AREG	B-cells|M2	1	-0.516636
ICAM1_AREG	B-cells|M2	1	-0.520769
EGFR_GRN	B-cells|M2	1	0.93885
TNFRSF1A_GRN	B-cells|M2	1	0.874207
EGFR_BTC	B-cells|M2	1	-0.351074
ERBB3_BTC	B-cells|M2	1	-0.318326
EGFR_COPA	B-cells|M2	1	-0.345564
CD74_COPA	B-cells|M2	1	1.05102
EGFR_EPGN	B-cells|M2	1	-0.275786
EGFR_HBEGF	B-cells|M2	1	-0.778432
CD44_HBEGF	B-cells|M2	1	-1.1016
CCL3_IDE	B-cells|M2	1	-0.314733
GRN_SORT1	B-cells|M2	1	-0.75877
COPA_SORT1	B-cells|M2	1	-0.537424
CD200_CD200R1	B-cells|M2	1	-0.112475
TNF_DAG1	B-cells|M2	1	-0.424688
LGALS9_DAG1	B-cells|M2	1	-0.545824
TNF_NOTCH1	B-cells|M2	1	-0.194295
TNF_TNFRSF1A	B-cells|M2	1	0.177599
TNF_FAS	B-cells|M2	1	-0.397828
TNF_CELSR2	B-cells|M2	1	-0.407364
CXCL1_CXCR1	B-cells|M2	1	-0.107803
CXCL2_CXCR1	B-cells|M2	1	-0.234465
PPBP_CXCR1	B-cells|M2	1	-0.0365259
CXCL3_CXCR1	B-cells|M2	1	-0.234465
CXCL1_CXCR2	B-cells|M2	1	-0.107803
CXCL2_CXCR2	B-cells|M2	1	-0.234465
PPBP_CXCR2	B-cells|M2	1	-0.0365259
CXCL3_CXCR2	B-cells|M2	1	-0.234465
LGALS9_MET	B-cells|M2	1	-0.603841
LGALS9_CD47	B-cells|M2	1	-0.00144342
LGALS9_PTPRK	B-cells|M2	1	-0.614845
WNT5A_PTPRK	B-cells|M2	1	-0.360305
LGALS9_COLEC12	B-cells|M2	1	-0.279284
LGALS9_SORL1	B-cells|M2	1	-0.701342
MDK_SORL1	B-cells|M2	1	-0.50226
TNFRSF11B_TNFSF10	B-cells|M2	1	-0.182786
FGFR2_EPHA4	B-cells|M2	1	-0.413115
EFNA1_EPHA4	B-cells|M2	1	-0.550043
EFNA4_EPHA4	B-cells|M2	1	-0.321928
EFNA5_EPHA4	B-cells|M2	1	-0.388355
EFNB2_EPHA4	B-cells|M2	1	-0.573467
WNT7B_FZD4	B-cells|M2	1	-0.352916
PLXNB2_PTN	B-cells|M2	1	-0.550043
PLXNB2_SEMA4D	B-cells|M2	1	-0.537424
MIF_TNFRSF10D	B-cells|M2	1	-0.724993
EFNA1_EPHA1	B-cells|M2	1	-0.32916
EFNA1_EPHA2	B-cells|M2	1	-0.821126
CXCR6_CXCL16	B-cells|M2	1	0.0482362
EREG_EGFR	B-cells|M2	1	-0.155213
PLD2_ARF1	B-cells|M2	1	-0.450084
EPHB2_EFNB2	B-cells|M2	1	-0.358454
EPHB2_EFNB1	B-cells|M2	1	-0.176251
EPHB3_EFNB1	B-cells|M2	1	-0.323733
EPHB4_EFNB1	B-cells|M2	1	-0.2567
EPHA4_EFNB1	B-cells|M2	1	-0.364013
EFNB2_EPHB4	B-cells|M2	1	-0.450084
EPHB2_EFNA5	B-cells|M2	1	-0.152003
EPHA1_EFNA5	B-cells|M2	1	-0.295128
EPHA2_EFNA5	B-cells|M2	1	-0.56918
EFNB2_EPHB3	B-cells|M2	1	-0.465938
EPHA1_EFNA4	B-cells|M2	1	-0.28279
EPHA2_EFNA4	B-cells|M2	1	-0.552156
CEACAM1_CEACAM8	B-cells|M2	1	-1.12658
FZD6_WNT5A	B-cells|M2	1	-0.217591
LRP6_CKLF	B-cells|M2	1	0.323082
CXCR1_CXCL5	B-cells|M2	1	-0.244685
CXCR2_CXCL5	B-cells|M2	1	-0.244685
CXCR1_YARS	B-cells|M2	1	-0.0320936
CXCR1_CXCL6	B-cells|M2	1	-0.244685
CXCR2_CXCL6	B-cells|M2	1	-0.244685
IL15_IL15RA	B-cells|M2	1	-0.226004
LTBR_LTB	B-cells|M2	1	-0.444184
DSG2_DSC3	B-cells|M2	1	-0.360305
DSC2_DSG2	B-cells|M2	1	-0.281036
KLRG2_WNT5B	B-cells|MDSC	1	-0.192645
CADM1_CADM1	B-cells|MDSC	1	-0.744197
SPP1_CD44	B-cells|MDSC	1	0.133564
LGALS9_CD44	B-cells|MDSC	1	0
FGF1_FGFR1	B-cells|MDSC	1	-0.492079
FGF1_FGFR2	B-cells|MDSC	1	-0.475936
CD44_FGFR2	B-cells|MDSC	1	-0.643856
FGFR1_FGFR2	B-cells|MDSC	1	-0.296899
SPP1_PTGER4	B-cells|MDSC	1	-0.349235
LAMP1_FAM3C	B-cells|MDSC	1	-0.888969
EGFR_TGFA	B-cells|MDSC	1	-0.345564
EGFR_MIF	B-cells|MDSC	1	-0.432455
CD74_MIF	B-cells|MDSC	0.0009	1.01863
EGFR_AREG	B-cells|MDSC	1	-0.492079
ICAM1_AREG	B-cells|MDSC	1	-0.496142
EGFR_GRN	B-cells|MDSC	1	-0.586406
TNFRSF1A_GRN	B-cells|MDSC	1	-0.780909
EGFR_BTC	B-cells|MDSC	1	-0.351074
ERBB3_BTC	B-cells|MDSC	1	-0.318326
EGFR_COPA	B-cells|MDSC	1	-0.590745
CD74_COPA	B-cells|MDSC	1	0.962734
EGFR_EPGN	B-cells|MDSC	1	-0.275786
EGFR_HBEGF	B-cells|MDSC	1	-1.11716
CD44_HBEGF	B-cells|MDSC	1	-1.53533
CCL3_IDE	B-cells|MDSC	1	-0.448115
GRN_SORT1	B-cells|MDSC	1	-0.717857
COPA_SORT1	B-cells|MDSC	1	-0.50226
CD200_CD200R1	B-cells|MDSC	1	-0.145605
TNF_DAG1	B-cells|MDSC	1	-0.612637
LGALS9_DAG1	B-cells|MDSC	1	-0.751465
TNF_NOTCH1	B-cells|MDSC	1	-0.405451
TNF_TNFRSF1A	B-cells|MDSC	1	-0.21927
TNF_FAS	B-cells|MDSC	1	0.396159
TNF_CELSR2	B-cells|MDSC	1	-0.364013
CXCL1_CXCR1	B-cells|MDSC	1	0.182692
CXCL2_CXCR1	B-cells|MDSC	1	0.0786098
PPBP_CXCR1	B-cells|MDSC	1	0.240009
CXCL3_CXCR1	B-cells|MDSC	1	0.0786098
CXCL1_CXCR2	B-cells|MDSC	1	0.182692
CXCL2_CXCR2	B-cells|MDSC	1	0.0786098
PPBP_CXCR2	B-cells|MDSC	1	0.240009
CXCL3_CXCR2	B-cells|MDSC	1	0.0786098
LGALS9_MET	B-cells|MDSC	1	-0.560643
LGALS9_CD47	B-cells|MDSC	1	-0.529073
LGALS9_PTPRK	B-cells|MDSC	1	-0.637109
WNT5A_PTPRK	B-cells|MDSC	1	-0.378944
LGALS9_COLEC12	B-cells|MDSC	1	-0.450084
LGALS9_SORL1	B-cells|MDSC	1	-0.405451
MDK_SORL1	B-cells|MDSC	1	-0.24127
TNFRSF11B_TNFSF10	B-cells|MDSC	1	-0.182786
FGFR2_EPHA4	B-cells|MDSC	1	-0.395929
EFNA1_EPHA4	B-cells|MDSC	1	-0.531156
EFNA4_EPHA4	B-cells|MDSC	1	-0.305788
EFNA5_EPHA4	B-cells|MDSC	1	-0.37146
EFNB2_EPHA4	B-cells|MDSC	1	-0.554273
WNT7B_FZD4	B-cells|MDSC	1	-0.352916
PLXNB2_PTN	B-cells|MDSC	1	-0.531156
PLXNB2_SEMA4D	B-cells|MDSC	1	0.343692
MIF_TNFRSF10D	B-cells|MDSC	1	-0.798366
EFNA1_EPHA1	B-cells|MDSC	1	-0.461959
EFNA1_EPHA2	B-cells|MDSC	1	-0.780909
CXCR6_CXCL16	B-cells|MDSC	1	-0.512514
EREG_EGFR	B-cells|MDSC	1	-0.232769
PLD2_ARF1	B-cells|MDSC	1	-0.498179
EPHB2_EFNB2	B-cells|MDSC	1	-0.341903
EPHB2_EFNB1	B-cells|MDSC	1	-0.215915
EPHB3_EFNB1	B-cells|MDSC	1	-0.367732
EPHB4_EFNB1	B-cells|MDSC	1	-0.298673
EPHA4_EFNB1	B-cells|MDSC	1	-0.409278
EFNB2_EPHB4	B-cells|MDSC	1	-0.450084
EPHB2_EFNA5	B-cells|MDSC	1	-0.1976
EPHA1_EFNA5	B-cells|MDSC	1	-0.347399
EPHA2_EFNA5	B-cells|MDSC	1	-0.630394
EFNB2_EPHB3	B-cells|MDSC	1	-0.516636
EPHA1_EFNA4	B-cells|MDSC	1	-0.270556
EPHA2_EFNA4	B-cells|MDSC	1	-0.537424
CEACAM1_CEACAM8	B-cells|MDSC	1	-1.22432
FZD6_WNT5A	B-cells|MDSC	1	-0.289827
LRP6_CKLF	B-cells|MDSC	1	-0.172994
CXCR1_CXCL5	B-cells|MDSC	1	-0.254978
CXCR2_CXCL5	B-cells|MDSC	1	-0.254978
CXCR1_YARS	B-cells|MDSC	1	-0.177882
CXCR1_CXCL6	B-cells|MDSC	1	-0.254978
CXCR2_CXCL6	B-cells|MDSC	1	-0.254978
IL15_IL15RA	B-cells|MDSC	1	-0.163268
LTBR_LTB	B-cells|MDSC	1	0.16221
DSG2_DSC3	B-cells|MDSC	1	-0.360305
DSC2_DSG2	B-cells|MDSC	1	-0.341903
KLRG2_WNT5B	B-cells|NKT	1	-0.192645
CADM1_CADM1	B-cells|NKT	1	-0.713119
SPP1_CD44	B-cells|NKT	1	-0.58208
LGALS9_CD44	B-cells|NKT	1	-0.808437
FGF1_FGFR1	B-cells|NKT	1	-0.448115
FGF1_FGFR2	B-cells|NKT	1	-0.434403
CD44_FGFR2	B-cells|NKT	1	-0.597278
FGFR1_FGFR2	B-cells|NKT	1	-0.261881
SPP1_PTGER4	B-cells|NKT	1	-0.217591
LAMP1_FAM3C	B-cells|NKT	1	-0.823677
EGFR_TGFA	B-cells|NKT	1	-0.327348
EGFR_MIF	B-cells|NKT	1	-0.625934
CD74_MIF	B-cells|NKT	0.0009	0.950842
EGFR_AREG	B-cells|NKT	1	-0.469929
ICAM1_AREG	B-cells|NKT	1	-0.473931
EGFR_GRN	B-cells|NKT	1	-0.766112
TNFRSF1A_GRN	B-cells|NKT	1	-0.988504
EGFR_BTC	B-cells|NKT	1	-0.300448
ERBB3_BTC	B-cells|NKT	1	-0.270556
EGFR_COPA	B-cells|NKT	1	-0.454032
CD74_COPA	B-cells|NKT	1	1.01078
EGFR_EPGN	B-cells|NKT	1	-0.275786
EGFR_HBEGF	B-cells|NKT	1	-1.12029
CD44_HBEGF	B-cells|NKT	1	-1.54372
CCL3_IDE	B-cells|NKT	1	-0.277534
GRN_SORT1	B-cells|NKT	1	-0.75877
COPA_SORT1	B-cells|NKT	1	-0.537424
CD200_CD200R1	B-cells|NKT	1	-0.181149
TNF_DAG1	B-cells|NKT	1	-0.512514
LGALS9_DAG1	B-cells|NKT	1	-0.641604
TNF_NOTCH1	B-cells|NKT	1	-0.265345
TNF_TNFRSF1A	B-cells|NKT	1	-0.194295
TNF_FAS	B-cells|NKT	1	-0.258425
TNF_CELSR2	B-cells|NKT	1	-0.407364
CXCL1_CXCR1	B-cells|NKT	1	-0.0409718
CXCL2_CXCR1	B-cells|NKT	1	-0.163268
PPBP_CXCR1	B-cells|NKT	1	0.0257376
CXCL3_CXCR1	B-cells|NKT	1	-0.163268
CXCL1_CXCR2	B-cells|NKT	1	-0.0409718
CXCL2_CXCR2	B-cells|NKT	1	-0.163268
PPBP_CXCR2	B-cells|NKT	1	0.0257376
CXCL3_CXCR2	B-cells|NKT	1	-0.163268
LGALS9_MET	B-cells|NKT	1	-0.526992
LGALS9_CD47	B-cells|NKT	1	0.0426443
LGALS9_PTPRK	B-cells|NKT	1	-0.655172
WNT5A_PTPRK	B-cells|NKT	1	-0.394032
LGALS9_COLEC12	B-cells|NKT	1	-0.403542
LGALS9_SORL1	B-cells|NKT	1	-0.411195
MDK_SORL1	B-cells|NKT	1	-0.246395
TNFRSF11B_TNFSF10	B-cells|NKT	1	-0.171368
FGFR2_EPHA4	B-cells|NKT	1	-0.413115
EFNA1_EPHA4	B-cells|NKT	1	-0.550043
EFNA4_EPHA4	B-cells|NKT	1	-0.321928
EFNA5_EPHA4	B-cells|NKT	1	-0.388355
EFNB2_EPHA4	B-cells|NKT	1	-0.573467
WNT7B_FZD4	B-cells|NKT	1	-0.352916
PLXNB2_PTN	B-cells|NKT	1	-0.550043
PLXNB2_SEMA4D	B-cells|NKT	1	-0.320126
MIF_TNFRSF10D	B-cells|NKT	1	-0.788365
EFNA1_EPHA1	B-cells|NKT	1	-0.454032
EFNA1_EPHA2	B-cells|NKT	1	-0.821126
CXCR6_CXCL16	B-cells|NKT	1	-0.514573
EREG_EGFR	B-cells|NKT	1	-0.253257
PLD2_ARF1	B-cells|NKT	1	-0.291592
EPHB2_EFNB2	B-cells|NKT	1	-0.358454
EPHB2_EFNB1	B-cells|NKT	1	-0.158429
EPHB3_EFNB1	B-cells|NKT	1	-0.304006
EPHB4_EFNB1	B-cells|NKT	1	-0.239566
EPHA4_EFNB1	B-cells|NKT	1	-0.343732
EFNB2_EPHB4	B-cells|NKT	1	-0.450084
EPHB2_EFNA5	B-cells|NKT	1	-0.1976
EPHA1_EFNA5	B-cells|NKT	1	-0.347399
EPHA2_EFNA5	B-cells|NKT	1	-0.630394
EFNB2_EPHB3	B-cells|NKT	1	-0.526992
EPHA1_EFNA4	B-cells|NKT	1	-0.28279
EPHA2_EFNA4	B-cells|NKT	1	-0.552156
CEACAM1_CEACAM8	B-cells|NKT	1	-1.26188
FZD6_WNT5A	B-cells|NKT	1	-0.289827
LRP6_CKLF	B-cells|NKT	1	-0.07552
CXCR1_CXCL5	B-cells|NKT	1	-0.26708
CXCR2_CXCL5	B-cells|NKT	1	-0.26708
CXCR1_YARS	B-cells|NKT	1	-0.0724828
CXCR1_CXCL6	B-cells|NKT	1	-0.26708
CXCR2_CXCL6	B-cells|NKT	1	-0.26708
IL15_IL15RA	B-cells|NKT	1	-0.226004
LTBR_LTB	B-cells|NKT	1	0.377401
DSG2_DSC3	B-cells|NKT	1	-0.312939
DSC2_DSG2	B-cells|NKT	1	-0.340075
KLRG2_WNT5B	B-cells|Progenitor	1	-0.0543923
CADM1_CADM1	B-cells|Progenitor	1	-0.0679388
SPP1_CD44	B-cells|Progenitor	1	0.340277
LGALS9_CD44	B-cells|Progenitor	1	0.22404
FGF1_FGFR1	B-cells|Progenitor	1	-0.32916
FGF1_FGFR2	B-cells|Progenitor	1	-0.275786
CD44_FGFR2	B-cells|Progenitor	1	-0.42082
FGFR1_FGFR2	B-cells|Progenitor	1	-0.120294
SPP1_PTGER4	B-cells|Progenitor	1	-0.00144342
LAMP1_FAM3C	B-cells|Progenitor	1	-0.275786
EGFR_TGFA	B-cells|Progenitor	1	-0.0634092
EGFR_MIF	B-cells|Progenitor	1	0.0799754
CD74_MIF	B-cells|Progenitor	0.0009	1.22774
EGFR_AREG	B-cells|Progenitor	1	0.0717627
ICAM1_AREG	B-cells|Progenitor	1	0.0690147
EGFR_GRN	B-cells|Progenitor	1	0.0172093
TNFRSF1A_GRN	B-cells|Progenitor	1	-0.107803
EGFR_BTC	B-cells|Progenitor	1	-0.00578235
ERBB3_BTC	B-cells|Progenitor	1	0.0186342
EGFR_COPA	B-cells|Progenitor	1	-0.0394883
CD74_COPA	B-cells|Progenitor	0.0009	1.17505
EGFR_EPGN	B-cells|Progenitor	1	-0.217591
EGFR_HBEGF	B-cells|Progenitor	1	0.233888
CD44_HBEGF	B-cells|Progenitor	1	0.0827026
CCL3_IDE	B-cells|Progenitor	1	-0.013043
GRN_SORT1	B-cells|Progenitor	1	-0.246395
COPA_SORT1	B-cells|Progenitor	1	-0.0877334
CD200_CD200R1	B-cells|Progenitor	1	0.163499
TNF_DAG1	B-cells|Progenitor	1	0.015783
LGALS9_DAG1	B-cells|Progenitor	1	-0.0724828
TNF_NOTCH1	B-cells|Progenitor	1	-0.179515
TNF_TNFRSF1A	B-cells|Progenitor	1	-0.224317
TNF_FAS	B-cells|Progenitor	1	-0.246395
TNF_CELSR2	B-cells|Progenitor	1	-0.0664274
CXCL1_CXCR1	B-cells|Progenitor	1	-0.155213
CXCL2_CXCR1	B-cells|Progenitor	1	-0.286304
PPBP_CXCR1	B-cells|Progenitor	1	-0.0816138
CXCL3_CXCR1	B-cells|Progenitor	1	-0.286304
CXCL1_CXCR2	B-cells|Progenitor	1	-0.155213
CXCL2_CXCR2	B-cells|Progenitor	1	-0.286304
PPBP_CXCR2	B-cells|Progenitor	1	-0.0816138
CXCL3_CXCR2	B-cells|Progenitor	1	-0.286304
LGALS9_MET	B-cells|Progenitor	1	-0.0350469
LGALS9_CD47	B-cells|Progenitor	1	-0.161653
LGALS9_PTPRK	B-cells|Progenitor	1	-0.0247367
WNT5A_PTPRK	B-cells|Progenitor	1	0.147958
LGALS9_COLEC12	B-cells|Progenitor	1	-0.405451
LGALS9_SORL1	B-cells|Progenitor	1	-0.00433459
MDK_SORL1	B-cells|Progenitor	1	0.121679
TNFRSF11B_TNFSF10	B-cells|Progenitor	1	0.144046
FGFR2_EPHA4	B-cells|Progenitor	1	0.0384362
EFNA1_EPHA4	B-cells|Progenitor	1	-0.0588937
EFNA4_EPHA4	B-cells|Progenitor	1	0.105678
EFNA5_EPHA4	B-cells|Progenitor	1	0.0565835
EFNB2_EPHA4	B-cells|Progenitor	1	-0.07552
WNT7B_FZD4	B-cells|Progenitor	1	-0.212568
PLXNB2_PTN	B-cells|Progenitor	1	-0.524915
PLXNB2_SEMA4D	B-cells|Progenitor	1	-0.360305
MIF_TNFRSF10D	B-cells|Progenitor	1	-0.526992
EFNA1_EPHA1	B-cells|Progenitor	1	-0.176251
EFNA1_EPHA2	B-cells|Progenitor	1	0.0962619
CXCR6_CXCL16	B-cells|Progenitor	1	0.0976108
EREG_EGFR	B-cells|Progenitor	1	0.0114956
PLD2_ARF1	B-cells|Progenitor	1	0.0922074
EPHB2_EFNB2	B-cells|Progenitor	1	0.319618
EPHB2_EFNB1	B-cells|Progenitor	1	0.0621217
EPHB3_EFNB1	B-cells|Progenitor	1	-0.0619024
EPHB4_EFNB1	B-cells|Progenitor	1	-0.00723157
EPHA4_EFNB1	B-cells|Progenitor	1	-0.0954196
EFNB2_EPHB4	B-cells|Progenitor	1	-0.275786
EPHB2_EFNA5	B-cells|Progenitor	1	0.00863031
EPHA1_EFNA5	B-cells|Progenitor	1	-0.120294
EPHA2_EFNA5	B-cells|Progenitor	1	-0.358454
EFNB2_EPHB3	B-cells|Progenitor	1	-0.0923402
EPHA1_EFNA4	B-cells|Progenitor	1	-0.0816138
EPHA2_EFNA4	B-cells|Progenitor	1	-0.314733
CEACAM1_CEACAM8	B-cells|Progenitor	1	0.0813396
FZD6_WNT5A	B-cells|Progenitor	1	-0.155213
LRP6_CKLF	B-cells|Progenitor	1	-0.215915
CXCR1_CXCL5	B-cells|Progenitor	1	0.614474
CXCR2_CXCL5	B-cells|Progenitor	1	0.614474
CXCR1_YARS	B-cells|Progenitor	1	0.0565835
CXCR1_CXCL6	B-cells|Progenitor	1	0.614474
CXCR2_CXCL6	B-cells|Progenitor	1	0.614474
IL15_IL15RA	B-cells|Progenitor	1	-0.0649175
LTBR_LTB	B-cells|Progenitor	1	-0.341903
DSG2_DSC3	B-cells|Progenitor	1	-0.2567
DSC2_DSG2	B-cells|Progenitor	1	0.0356239
KLRG2_WNT5B	B-cells|Stromal	1	-0.192645
CADM1_CADM1	B-cells|Stromal	1	-0.713119
SPP1_CD44	B-cells|Stromal	1	-0.703689
LGALS9_CD44	B-cells|Stromal	1	-0.954557
FGF1_FGFR1	B-cells|Stromal	1	-0.110916
FGF1_FGFR2	B-cells|Stromal	1	-0.442222
CD44_FGFR2	B-cells|Stromal	1	-0.606035
FGFR1_FGFR2	B-cells|Stromal	1	-0.26708
SPP1_PTGER4	B-cells|Stromal	1	-0.286304
LAMP1_FAM3C	B-cells|Stromal	1	-0.586406
EGFR_TGFA	B-cells|Stromal	1	-0.242977
EGFR_MIF	B-cells|Stromal	1	-0.831358
CD74_MIF	B-cells|Stromal	0.0009	0.885184
EGFR_AREG	B-cells|Stromal	1	-0.479955
ICAM1_AREG	B-cells|Stromal	1	-0.483985
EGFR_GRN	B-cells|Stromal	1	-0.467932
TNFRSF1A_GRN	B-cells|Stromal	1	-0.646112
EGFR_BTC	B-cells|Stromal	1	-0.351074
ERBB3_BTC	B-cells|Stromal	1	-0.318326
EGFR_COPA	B-cells|Stromal	1	-0.274041
CD74_COPA	B-cells|Stromal	0.0009	1.07861
EGFR_EPGN	B-cells|Stromal	1	-0.239566
EGFR_HBEGF	B-cells|Stromal	1	-0.181149
CD44_HBEGF	B-cells|Stromal	1	-0.384584
CCL3_IDE	B-cells|Stromal	1	-0.279284
GRN_SORT1	B-cells|Stromal	1	-0.687335
COPA_SORT1	B-cells|Stromal	1	-0.475936
CD200_CD200R1	B-cells|Stromal	1	-0.106249
TNF_DAG1	B-cells|Stromal	1	-0.246395
LGALS9_DAG1	B-cells|Stromal	1	-0.351074
TNF_NOTCH1	B-cells|Stromal	1	0.574344
TNF_TNFRSF1A	B-cells|Stromal	1	0.204141
TNF_FAS	B-cells|Stromal	1	-0.272297
TNF_CELSR2	B-cells|Stromal	1	-0.323733
CXCL1_CXCR1	B-cells|Stromal	1	-0.0306192
CXCL2_CXCR1	B-cells|Stromal	1	-0.150401
PPBP_CXCR1	B-cells|Stromal	1	0.0370307
CXCL3_CXCR1	B-cells|Stromal	1	-0.150401
CXCL1_CXCR2	B-cells|Stromal	1	-0.0306192
CXCL2_CXCR2	B-cells|Stromal	1	-0.150401
PPBP_CXCR2	B-cells|Stromal	1	0.0370307
CXCL3_CXCR2	B-cells|Stromal	1	-0.150401
LGALS9_MET	B-cells|Stromal	1	-0.415037
LGALS9_CD47	B-cells|Stromal	1	0.0799754
LGALS9_PTPRK	B-cells|Stromal	1	-0.0816138
WNT5A_PTPRK	B-cells|Stromal	1	0.0989585
LGALS9_COLEC12	B-cells|Stromal	1	-0.272297
LGALS9_SORL1	B-cells|Stromal	1	-0.72261
MDK_SORL1	B-cells|Stromal	1	-0.520769
TNFRSF11B_TNFSF10	B-cells|Stromal	1	0.111031
FGFR2_EPHA4	B-cells|Stromal	1	-0.0247367
EFNA1_EPHA4	B-cells|Stromal	1	-0.128156
EFNA4_EPHA4	B-cells|Stromal	1	0.045443
EFNA5_EPHA4	B-cells|Stromal	1	-0.00578235
EFNB2_EPHA4	B-cells|Stromal	1	-0.145605
WNT7B_FZD4	B-cells|Stromal	1	0.54498
PLXNB2_PTN	B-cells|Stromal	1	-0.463947
PLXNB2_SEMA4D	B-cells|Stromal	1	-0.463947
MIF_TNFRSF10D	B-cells|Stromal	0.976	-0.0679388
EFNA1_EPHA1	B-cells|Stromal	1	-0.275786
EFNA1_EPHA2	B-cells|Stromal	1	-0.332789
CXCR6_CXCL16	B-cells|Stromal	1	-0.490051
EREG_EGFR	B-cells|Stromal	1	-0.265345
PLD2_ARF1	B-cells|Stromal	1	-0.248108
EPHB2_EFNB2	B-cells|Stromal	1	-0.0573917
EPHB2_EFNB1	B-cells|Stromal	1	0.0243197
EPHB3_EFNB1	B-cells|Stromal	1	-0.104697
EPHB4_EFNB1	B-cells|Stromal	1	-0.046921
EPHA4_EFNB1	B-cells|Stromal	1	-0.137648
EFNB2_EPHB4	B-cells|Stromal	1	0.187768
EPHB2_EFNA5	B-cells|Stromal	1	-0.139236
EPHA1_EFNA5	B-cells|Stromal	1	-0.281036
EPHA2_EFNA5	B-cells|Stromal	1	-0.550043
EFNB2_EPHB3	B-cells|Stromal	1	-0.481969
EPHA1_EFNA4	B-cells|Stromal	1	-0.209228
EPHA2_EFNA4	B-cells|Stromal	1	-0.465938
CEACAM1_CEACAM8	B-cells|Stromal	1	-1.07704
FZD6_WNT5A	B-cells|Stromal	1	-0.258425
LRP6_CKLF	B-cells|Stromal	1	-0.176251
CXCR1_CXCL5	B-cells|Stromal	1	-0.258425
CXCR2_CXCL5	B-cells|Stromal	1	-0.258425
CXCR1_YARS	B-cells|Stromal	1	0.259423
CXCR1_CXCL6	B-cells|Stromal	1	-0.258425
CXCR2_CXCL6	B-cells|Stromal	1	-0.258425
IL15_IL15RA	B-cells|Stromal	1	-0.14401
LTBR_LTB	B-cells|Stromal	1	-0.424688
DSG2_DSC3	B-cells|Stromal	1	-0.360305
DSC2_DSG2	B-cells|Stromal	1	-0.300448
KLRG2_WNT5B	B-cells|TAM	1	-0.192645
CADM1_CADM1	B-cells|TAM	1	-0.136062
SPP1_CD44	B-cells|TAM	1	-0.382702
LGALS9_CD44	B-cells|TAM	1	-0.577767
FGF1_FGFR1	B-cells|TAM	1	-0.483985
FGF1_FGFR2	B-cells|TAM	1	-0.45799
CD44_FGFR2	B-cells|TAM	1	-0.62371
FGFR1_FGFR2	B-cells|TAM	1	-0.281036
SPP1_PTGER4	B-cells|TAM	1	-0.246395
LAMP1_FAM3C	B-cells|TAM	1	-0.471929
EGFR_TGFA	B-cells|TAM	1	-0.351074
EGFR_MIF	B-cells|TAM	1	-0.309359
CD74_MIF	B-cells|TAM	0.0009	1.06557
EGFR_AREG	B-cells|TAM	1	-0.45799
ICAM1_AREG	B-cells|TAM	1	-0.461959
EGFR_GRN	B-cells|TAM	1	0.541019
TNFRSF1A_GRN	B-cells|TAM	1	0.455229
EGFR_BTC	B-cells|TAM	1	-0.327348
ERBB3_BTC	B-cells|TAM	1	-0.295128
EGFR_COPA	B-cells|TAM	1	-0.309359
CD74_COPA	B-cells|TAM	0.0009	1.06488
EGFR_EPGN	B-cells|TAM	1	-0.263612
EGFR_HBEGF	B-cells|TAM	1	-1.13289
CD44_HBEGF	B-cells|TAM	1	-1.56064
CCL3_IDE	B-cells|TAM	1	-0.37146
GRN_SORT1	B-cells|TAM	1	-0.72261
COPA_SORT1	B-cells|TAM	1	-0.506353
CD200_CD200R1	B-cells|TAM	1	-0.166503
TNF_DAG1	B-cells|TAM	1	-0.494109
LGALS9_DAG1	B-cells|TAM	1	-0.621488
TNF_NOTCH1	B-cells|TAM	1	-0.305788
TNF_TNFRSF1A	B-cells|TAM	1	-0.123434
TNF_FAS	B-cells|TAM	1	-0.309359
TNF_CELSR2	B-cells|TAM	1	-0.407364
CXCL1_CXCR1	B-cells|TAM	1	-0.161653
CXCL2_CXCR1	B-cells|TAM	1	-0.293359
PPBP_CXCR1	B-cells|TAM	1	-0.0877334
CXCL3_CXCR1	B-cells|TAM	1	-0.293359
CXCL1_CXCR2	B-cells|TAM	1	-0.161653
CXCL2_CXCR2	B-cells|TAM	1	-0.293359
PPBP_CXCR2	B-cells|TAM	1	-0.0877334
CXCL3_CXCR2	B-cells|TAM	1	-0.293359
LGALS9_MET	B-cells|TAM	1	-0.590745
LGALS9_CD47	B-cells|TAM	1	-0.131313
LGALS9_PTPRK	B-cells|TAM	1	-0.643856
WNT5A_PTPRK	B-cells|TAM	1	-0.386468
LGALS9_COLEC12	B-cells|TAM	1	-0.424688
LGALS9_SORL1	B-cells|TAM	1	-0.520769
MDK_SORL1	B-cells|TAM	1	-0.343732
TNFRSF11B_TNFSF10	B-cells|TAM	1	-0.251539
FGFR2_EPHA4	B-cells|TAM	1	-0.397828
EFNA1_EPHA4	B-cells|TAM	1	-0.533242
EFNA4_EPHA4	B-cells|TAM	1	-0.307573
EFNA5_EPHA4	B-cells|TAM	1	-0.373327
EFNB2_EPHA4	B-cells|TAM	1	-0.556393
WNT7B_FZD4	B-cells|TAM	1	-0.323733
PLXNB2_PTN	B-cells|TAM	1	-0.545824
PLXNB2_SEMA4D	B-cells|TAM	1	-0.046921
MIF_TNFRSF10D	B-cells|TAM	1	-0.643856
EFNA1_EPHA1	B-cells|TAM	1	-0.473931
EFNA1_EPHA2	B-cells|TAM	1	-0.753896
CXCR6_CXCL16	B-cells|TAM	1	0.80653
EREG_EGFR	B-cells|TAM	1	-0.248108
PLD2_ARF1	B-cells|TAM	1	-0.174621
EPHB2_EFNB2	B-cells|TAM	1	-0.354759
EPHB2_EFNB1	B-cells|TAM	1	-0.244685
EPHB3_EFNB1	B-cells|TAM	1	-0.39973
EPHB4_EFNB1	B-cells|TAM	1	-0.32916
EPHA4_EFNB1	B-cells|TAM	1	-0.442222
EFNB2_EPHB4	B-cells|TAM	1	-0.450084
EPHB2_EFNA5	B-cells|TAM	1	-0.186065
EPHA1_EFNA5	B-cells|TAM	1	-0.332789
EPHA2_EFNA5	B-cells|TAM	1	-0.612637
EFNB2_EPHB3	B-cells|TAM	1	-0.514573
EPHA1_EFNA4	B-cells|TAM	1	-0.28279
EPHA2_EFNA4	B-cells|TAM	1	-0.552156
CEACAM1_CEACAM8	B-cells|TAM	1	-1.22769
FZD6_WNT5A	B-cells|TAM	1	-0.289827
LRP6_CKLF	B-cells|TAM	1	0.155749
CXCR1_CXCL5	B-cells|TAM	1	-0.277534
CXCR2_CXCL5	B-cells|TAM	1	-0.277534
CXCR1_YARS	B-cells|TAM	1	-0.093879
CXCR1_CXCL6	B-cells|TAM	1	-0.277534
CXCR2_CXCL6	B-cells|TAM	1	-0.277534
IL15_IL15RA	B-cells|TAM	1	-0.187707
LTBR_LTB	B-cells|TAM	1	-0.390245
DSG2_DSC3	B-cells|TAM	1	-0.360305
DSC2_DSG2	B-cells|TAM	1	-0.347399
KLRG2_WNT5B	B-cells|TRM	1	-0.192645
CADM1_CADM1	B-cells|TRM	1	-0.778432
SPP1_CD44	B-cells|TRM	1	-0.805913
LGALS9_CD44	B-cells|TRM	1	-1.074
FGF1_FGFR1	B-cells|TRM	1	-0.508403
FGF1_FGFR2	B-cells|TRM	1	-0.475936
CD44_FGFR2	B-cells|TRM	1	-0.643856
FGFR1_FGFR2	B-cells|TRM	1	-0.296899
SPP1_PTGER4	B-cells|TRM	1	-0.349235
LAMP1_FAM3C	B-cells|TRM	0.884	-0.199255
EGFR_TGFA	B-cells|TRM	1	-0.360305
EGFR_MIF	B-cells|TRM	1	-1.16488
CD74_MIF	B-cells|TRM	1	0.791606
EGFR_AREG	B-cells|TRM	1	-0.516636
ICAM1_AREG	B-cells|TRM	1	-0.520769
EGFR_GRN	B-cells|TRM	1	-0.508403
TNFRSF1A_GRN	B-cells|TRM	1	-0.691989
EGFR_BTC	B-cells|TRM	1	-0.351074
ERBB3_BTC	B-cells|TRM	1	-0.318326
EGFR_COPA	B-cells|TRM	1	-0.643856
CD74_COPA	B-cells|TRM	1	0.944858
EGFR_EPGN	B-cells|TRM	1	-0.275786
EGFR_HBEGF	B-cells|TRM	1	-1.22769
CD44_HBEGF	B-cells|TRM	1	-1.68966
CCL3_IDE	B-cells|TRM	1	-0.448115
GRN_SORT1	B-cells|TRM	1	-0.75877
COPA_SORT1	B-cells|TRM	1	-0.537424
CD200_CD200R1	B-cells|TRM	1	-0.181149
TNF_DAG1	B-cells|TRM	1	-0.641604
LGALS9_DAG1	B-cells|TRM	1	-0.78339
TNF_NOTCH1	B-cells|TRM	1	0.0071955
TNF_TNFRSF1A	B-cells|TRM	1	-0.33825
TNF_FAS	B-cells|TRM	1	-0.397828
TNF_CELSR2	B-cells|TRM	1	-0.407364
CXCL1_CXCR1	B-cells|TRM	1	-0.272297
CXCL2_CXCR1	B-cells|TRM	1	-0.416962
PPBP_CXCR1	B-cells|TRM	1	-0.194295
CXCL3_CXCR1	B-cells|TRM	1	-0.416962
CXCL1_CXCR2	B-cells|TRM	1	-0.272297
CXCL2_CXCR2	B-cells|TRM	1	-0.416962
PPBP_CXCR2	B-cells|TRM	1	-0.194295
CXCL3_CXCR2	B-cells|TRM	1	-0.416962
LGALS9_MET	B-cells|TRM	1	-0.603841
LGALS9_CD47	B-cells|TRM	1	-0.209228
LGALS9_PTPRK	B-cells|TRM	1	-0.655172
WNT5A_PTPRK	B-cells|TRM	1	-0.394032
LGALS9_COLEC12	B-cells|TRM	1	-0.533242
LGALS9_SORL1	B-cells|TRM	1	-0.332789
MDK_SORL1	B-cells|TRM	1	-0.176251
TNFRSF11B_TNFSF10	B-cells|TRM	1	-0.286304
FGFR2_EPHA4	B-cells|TRM	1	-0.413115
EFNA1_EPHA4	B-cells|TRM	1	-0.550043
EFNA4_EPHA4	B-cells|TRM	1	-0.321928
EFNA5_EPHA4	B-cells|TRM	1	-0.388355
EFNB2_EPHA4	B-cells|TRM	1	-0.573467
WNT7B_FZD4	B-cells|TRM	1	-0.352916
PLXNB2_PTN	B-cells|TRM	1	-0.550043
PLXNB2_SEMA4D	B-cells|TRM	1	-0.537424
MIF_TNFRSF10D	B-cells|TRM	1	-0.168123
EFNA1_EPHA1	B-cells|TRM	1	-0.50226
EFNA1_EPHA2	B-cells|TRM	1	-0.821126
CXCR6_CXCL16	B-cells|TRM	1	1.06074
EREG_EGFR	B-cells|TRM	1	-0.281036
PLD2_ARF1	B-cells|TRM	1	-0.300448
EPHB2_EFNB2	B-cells|TRM	1	-0.358454
EPHB2_EFNB1	B-cells|TRM	1	-0.251539
EPHB3_EFNB1	B-cells|TRM	1	-0.407364
EPHB4_EFNB1	B-cells|TRM	1	-0.336428
EPHA4_EFNB1	B-cells|TRM	1	-0.448115
EFNB2_EPHB4	B-cells|TRM	1	-0.450084
EPHB2_EFNA5	B-cells|TRM	1	-0.1976
EPHA1_EFNA5	B-cells|TRM	1	-0.347399
EPHA2_EFNA5	B-cells|TRM	1	-0.630394
EFNB2_EPHB3	B-cells|TRM	1	0.100305
EPHA1_EFNA4	B-cells|TRM	1	-0.28279
EPHA2_EFNA4	B-cells|TRM	1	-0.552156
CEACAM1_CEACAM8	B-cells|TRM	1	-1.2863
FZD6_WNT5A	B-cells|TRM	1	-0.289827
LRP6_CKLF	B-cells|TRM	1	-0.365871
CXCR1_CXCL5	B-cells|TRM	1	-0.316528
CXCR2_CXCL5	B-cells|TRM	1	-0.316528
CXCR1_YARS	B-cells|TRM	1	0.204141
CXCR1_CXCL6	B-cells|TRM	1	-0.316528
CXCR2_CXCL6	B-cells|TRM	1	-0.316528
IL15_IL15RA	B-cells|TRM	1	-0.226004
LTBR_LTB	B-cells|TRM	1	-0.444184
DSG2_DSC3	B-cells|TRM	1	-0.360305
DSC2_DSG2	B-cells|TRM	1	-0.362158
KLRG2_WNT5B	Basal|B-cells	1	-0.118727
CADM1_CADM1	Basal|B-cells	1	-0.378944
SPP1_CD44	Basal|B-cells	1	-0.514573
LGALS9_CD44	Basal|B-cells	1	-0.492079
FGF1_FGFR1	Basal|B-cells	1	0.0949116
FGF1_FGFR2	Basal|B-cells	1	0.0243197
CD44_FGFR2	Basal|B-cells	1	-0.148801
FGFR1_FGFR2	Basal|B-cells	1	-0.169745
SPP1_PTGER4	Basal|B-cells	1	-0.249822
LAMP1_FAM3C	Basal|B-cells	1	-0.254978
EGFR_TGFA	Basal|B-cells	1	-0.0558912
EGFR_MIF	Basal|B-cells	1	-0.465938
CD74_MIF	Basal|B-cells	1	-1.0862
EGFR_AREG	Basal|B-cells	1	-0.181149
ICAM1_AREG	Basal|B-cells	1	-0.227692
EGFR_GRN	Basal|B-cells	1	-0.334607
TNFRSF1A_GRN	Basal|B-cells	1	-0.415037
EGFR_BTC	Basal|B-cells	1	-0.00433459
ERBB3_BTC	Basal|B-cells	1	-0.217591
EGFR_COPA	Basal|B-cells	1	-0.164884
CD74_COPA	Basal|B-cells	1	-0.646112
EGFR_EPGN	Basal|B-cells	1	0.0129262
EGFR_HBEGF	Basal|B-cells	1	-0.662004
CD44_HBEGF	Basal|B-cells	1	-0.749038
CCL3_IDE	Basal|B-cells	1	-0.365871
GRN_SORT1	Basal|B-cells	1	-0.529073
COPA_SORT1	Basal|B-cells	1	-0.311148
CD200_CD200R1	Basal|B-cells	1	-0.106249
TNF_DAG1	Basal|B-cells	1	-0.454032
LGALS9_DAG1	Basal|B-cells	1	-0.325539
TNF_NOTCH1	Basal|B-cells	1	-0.397828
TNF_TNFRSF1A	Basal|B-cells	1	-0.567041
TNF_FAS	Basal|B-cells	1	-0.37146
TNF_CELSR2	Basal|B-cells	1	-0.378944
CXCL1_CXCR1	Basal|B-cells	1	-0.0558912
CXCL2_CXCR1	Basal|B-cells	1	0.0840643
PPBP_CXCR1	Basal|B-cells	1	-0.0320936
CXCL3_CXCR1	Basal|B-cells	1	0.0840643
CXCL1_CXCR2	Basal|B-cells	1	-0.0558912
CXCL2_CXCR2	Basal|B-cells	1	0.0840643
PPBP_CXCR2	Basal|B-cells	1	-0.0320936
CXCL3_CXCR2	Basal|B-cells	1	0.0840643
LGALS9_MET	Basal|B-cells	1	-0.320126
LGALS9_CD47	Basal|B-cells	1	-0.232769
LGALS9_PTPRK	Basal|B-cells	1	-0.340075
WNT5A_PTPRK	Basal|B-cells	1	-0.184425
LGALS9_COLEC12	Basal|B-cells	1	-0.093879
LGALS9_SORL1	Basal|B-cells	1	-0.172994
MDK_SORL1	Basal|B-cells	1	0.172488
TNFRSF11B_TNFSF10	Basal|B-cells	1	-0.246395
FGFR2_EPHA4	Basal|B-cells	1	0.187768
EFNA1_EPHA4	Basal|B-cells	1	-0.166503
EFNA4_EPHA4	Basal|B-cells	1	-0.187707
EFNA5_EPHA4	Basal|B-cells	1	-0.00868224
EFNB2_EPHA4	Basal|B-cells	1	-0.249822
WNT7B_FZD4	Basal|B-cells	1	0.169925
PLXNB2_PTN	Basal|B-cells	1	-0.327348
PLXNB2_SEMA4D	Basal|B-cells	1	-0.0846703
MIF_TNFRSF10D	Basal|B-cells	1	0.37629
EFNA1_EPHA1	Basal|B-cells	1	-0.129734
EFNA1_EPHA2	Basal|B-cells	1	-0.369595
CXCR6_CXCL16	Basal|B-cells	1	-0.619271
EREG_EGFR	Basal|B-cells	1	-0.120294
PLD2_ARF1	Basal|B-cells	1	-0.222633
EPHB2_EFNB2	Basal|B-cells	1	-0.28279
EPHB2_EFNB1	Basal|B-cells	1	-0.181149
EPHB3_EFNB1	Basal|B-cells	1	-0.0877334
EPHB4_EFNB1	Basal|B-cells	1	-0.182786
EPHA4_EFNB1	Basal|B-cells	1	-0.0816138
EFNB2_EPHB4	Basal|B-cells	1	-0.152003
EPHB2_EFNA5	Basal|B-cells	1	-0.131313
EPHA1_EFNA5	Basal|B-cells	1	-0.0499049
EPHA2_EFNA5	Basal|B-cells	1	0.138814
EFNB2_EPHB3	Basal|B-cells	1	-0.212568
EPHA1_EFNA4	Basal|B-cells	1	0.00288251
EPHA2_EFNA4	Basal|B-cells	1	0.185232
CEACAM1_CEACAM8	Basal|B-cells	1	-0.988504
FZD6_WNT5A	Basal|B-cells	1	-0.0174171
LRP6_CKLF	Basal|B-cells	1	0.051024
CXCR1_CXCL5	Basal|B-cells	1	-0.28279
CXCR2_CXCL5	Basal|B-cells	1	-0.28279
CXCR1_YARS	Basal|B-cells	1	0.041243
CXCR1_CXCL6	Basal|B-cells	1	-0.28279
CXCR2_CXCL6	Basal|B-cells	1	-0.28279
IL15_IL15RA	Basal|B-cells	1	-0.217591
LTBR_LTB	Basal|B-cells	0.0009	0.522056
DSG2_DSC3	Basal|B-cells	1	-0.0320936
DSC2_DSG2	Basal|B-cells	1	-0.155213
KLRG2_WNT5B	Basal|CD8	1	-0.118727
CADM1_CADM1	Basal|CD8	1	-0.378944
SPP1_CD44	Basal|CD8	1	-0.446148
LGALS9_CD44	Basal|CD8	1	-0.426625
FGF1_FGFR1	Basal|CD8	1	0.0593553
FGF1_FGFR2	Basal|CD8	1	0.0426443
CD44_FGFR2	Basal|CD8	1	-0.128156
FGFR1_FGFR2	Basal|CD8	1	-0.150401
SPP1_PTGER4	Basal|CD8	1	-0.231075
LAMP1_FAM3C	Basal|CD8	1	-0.12658
EGFR_TGFA	Basal|CD8	1	-0.00433459
EGFR_MIF	Basal|CD8	1	-0.296899
CD74_MIF	Basal|CD8	1	-0.833927
EGFR_AREG	Basal|CD8	1	-0.163268
ICAM1_AREG	Basal|CD8	1	-0.209228
EGFR_GRN	Basal|CD8	1	-0.388355
TNFRSF1A_GRN	Basal|CD8	1	-0.471929
EGFR_BTC	Basal|CD8	1	0.0384362
ERBB3_BTC	Basal|CD8	1	-0.166503
EGFR_COPA	Basal|CD8	1	-0.12658
CD74_COPA	Basal|CD8	1	-0.592919
EGFR_EPGN	Basal|CD8	1	0.0129262
EGFR_HBEGF	Basal|CD8	1	-0.685014
CD44_HBEGF	Basal|CD8	1	-0.773491
CCL3_IDE	Basal|CD8	1	-0.33825
GRN_SORT1	Basal|CD8	1	-0.529073
COPA_SORT1	Basal|CD8	1	-0.311148
CD200_CD200R1	Basal|CD8	1	-0.106249
TNF_DAG1	Basal|CD8	1	-0.564905
LGALS9_DAG1	Basal|CD8	1	-0.424688
TNF_NOTCH1	Basal|CD8	1	-0.37707
TNF_TNFRSF1A	Basal|CD8	1	-0.386468
TNF_FAS	Basal|CD8	1	-0.190997
TNF_CELSR2	Basal|CD8	1	-0.349235
CXCL1_CXCR1	Basal|CD8	1	-0.0543923
CXCL2_CXCR1	Basal|CD8	1	0.0854247
PPBP_CXCR1	Basal|CD8	1	-0.0320936
CXCL3_CXCR1	Basal|CD8	1	0.0854247
CXCL1_CXCR2	Basal|CD8	1	-0.0543923
CXCL2_CXCR2	Basal|CD8	1	0.0854247
PPBP_CXCR2	Basal|CD8	1	-0.0320936
CXCL3_CXCR2	Basal|CD8	1	0.0854247
LGALS9_MET	Basal|CD8	1	-0.320126
LGALS9_CD47	Basal|CD8	1	-0.0424568
LGALS9_PTPRK	Basal|CD8	1	-0.362158
WNT5A_PTPRK	Basal|CD8	1	-0.204233
LGALS9_COLEC12	Basal|CD8	1	-0.232769
LGALS9_SORL1	Basal|CD8	1	-0.163268
MDK_SORL1	Basal|CD8	1	0.178874
TNFRSF11B_TNFSF10	Basal|CD8	1	-0.0558912
FGFR2_EPHA4	Basal|CD8	1	0.187768
EFNA1_EPHA4	Basal|CD8	1	-0.166503
EFNA4_EPHA4	Basal|CD8	1	-0.187707
EFNA5_EPHA4	Basal|CD8	1	-0.00868224
EFNB2_EPHA4	Basal|CD8	1	-0.249822
WNT7B_FZD4	Basal|CD8	1	0.169925
PLXNB2_PTN	Basal|CD8	1	-0.327348
PLXNB2_SEMA4D	Basal|CD8	1	-0.100051
MIF_TNFRSF10D	Basal|CD8	1	0.358396
EFNA1_EPHA1	Basal|CD8	1	-0.107803
EFNA1_EPHA2	Basal|CD8	1	-0.360305
CXCR6_CXCL16	Basal|CD8	1	-0.597278
EREG_EGFR	Basal|CD8	1	-0.109359
PLD2_ARF1	Basal|CD8	1	-0.289827
EPHB2_EFNB2	Basal|CD8	1	-0.270556
EPHB2_EFNB1	Basal|CD8	1	-0.181149
EPHB3_EFNB1	Basal|CD8	1	-0.0877334
EPHB4_EFNB1	Basal|CD8	1	-0.182786
EPHA4_EFNB1	Basal|CD8	1	-0.0816138
EFNB2_EPHB4	Basal|CD8	1	-0.152003
EPHB2_EFNA5	Basal|CD8	1	-0.131313
EPHA1_EFNA5	Basal|CD8	1	-0.0499049
EPHA2_EFNA5	Basal|CD8	1	0.138814
EFNB2_EPHB3	Basal|CD8	1	-0.199255
EPHA1_EFNA4	Basal|CD8	1	0.0229004
EPHA2_EFNA4	Basal|CD8	1	0.202888
CEACAM1_CEACAM8	Basal|CD8	1	-0.957356
FZD6_WNT5A	Basal|CD8	1	-0.0174171
LRP6_CKLF	Basal|CD8	1	0.0935602
CXCR1_CXCL5	Basal|CD8	1	-0.2567
CXCR2_CXCL5	Basal|CD8	1	-0.2567
CXCR1_YARS	Basal|CD8	1	-0.0528949
CXCR1_CXCL6	Basal|CD8	1	-0.2567
CXCR2_CXCL6	Basal|CD8	1	-0.2567
IL15_IL15RA	Basal|CD8	1	-0.190997
LTBR_LTB	Basal|CD8	0.0009	0.744161
DSG2_DSC3	Basal|CD8	1	-0.00433459
DSC2_DSG2	Basal|CD8	1	-0.123434
KLRG2_WNT5B	Basal|DC	1	-0.118727
CADM1_CADM1	Basal|DC	1	-0.120294
SPP1_CD44	Basal|DC	1	-0.244685
LGALS9_CD44	Basal|DC	1	-0.226004
FGF1_FGFR1	Basal|DC	1	0.0635029
FGF1_FGFR2	Basal|DC	1	0.0243197
CD44_FGFR2	Basal|DC	1	-0.148801
FGFR1_FGFR2	Basal|DC	1	-0.169745
SPP1_PTGER4	Basal|DC	1	0.167358
LAMP1_FAM3C	Basal|DC	1	-0.172994
EGFR_TGFA	Basal|DC	1	-0.0291463
EGFR_MIF	Basal|DC	1	-0.234465
CD74_MIF	Basal|DC	1	-0.744197
EGFR_AREG	Basal|DC	1	-0.0603973
ICAM1_AREG	Basal|DC	1	-0.103147
EGFR_GRN	Basal|DC	1	0.0635029
TNFRSF1A_GRN	Basal|DC	0.876	0.00144197
EGFR_BTC	Basal|DC	1	-0.0144996
ERBB3_BTC	Basal|DC	1	-0.229382
EGFR_COPA	Basal|DC	1	-0.0603973
CD74_COPA	Basal|DC	1	-0.50226
EGFR_EPGN	Basal|DC	1	0.0129262
EGFR_HBEGF	Basal|DC	1	-0.671164
CD44_HBEGF	Basal|DC	1	-0.761213
CCL3_IDE	Basal|DC	1	-0.341903
GRN_SORT1	Basal|DC	1	-0.349235
COPA_SORT1	Basal|DC	1	-0.155213
CD200_CD200R1	Basal|DC	1	-0.0424568
TNF_DAG1	Basal|DC	1	-0.529073
LGALS9_DAG1	Basal|DC	1	-0.394032
TNF_NOTCH1	Basal|DC	1	-0.390245
TNF_TNFRSF1A	Basal|DC	1	-0.0528949
TNF_FAS	Basal|DC	1	-0.172994
TNF_CELSR2	Basal|DC	1	-0.340075
CXCL1_CXCR1	Basal|DC	1	-0.0800879
CXCL2_CXCR1	Basal|DC	1	0.0621217
PPBP_CXCR1	Basal|DC	1	-0.0573917
CXCL3_CXCR1	Basal|DC	1	0.0621217
CXCL1_CXCR2	Basal|DC	1	-0.0800879
CXCL2_CXCR2	Basal|DC	1	0.0621217
PPBP_CXCR2	Basal|DC	1	-0.0573917
CXCL3_CXCR2	Basal|DC	1	0.0621217
LGALS9_MET	Basal|DC	1	-0.295128
LGALS9_CD47	Basal|DC	0.0009	0.371838
LGALS9_PTPRK	Basal|DC	1	-0.362158
WNT5A_PTPRK	Basal|DC	1	-0.204233
LGALS9_COLEC12	Basal|DC	1	-0.261881
LGALS9_SORL1	Basal|DC	1	-0.307573
MDK_SORL1	Basal|DC	1	0.0676387
TNFRSF11B_TNFSF10	Basal|DC	1	-0.205896
FGFR2_EPHA4	Basal|DC	1	0.199123
EFNA1_EPHA4	Basal|DC	1	-0.152003
EFNA4_EPHA4	Basal|DC	1	-0.172994
EFNA5_EPHA4	Basal|DC	1	0.00432161
EFNB2_EPHA4	Basal|DC	1	-0.236164
WNT7B_FZD4	Basal|DC	1	0.210389
PLXNB2_PTN	Basal|DC	1	-0.309359
PLXNB2_SEMA4D	Basal|DC	1	-0.101598
MIF_TNFRSF10D	Basal|DC	1	0.396159
EFNA1_EPHA1	Basal|DC	1	-0.0785637
EFNA1_EPHA2	Basal|DC	1	-0.307573
CXCR6_CXCL16	Basal|DC	1	0.512985
EREG_EGFR	Basal|DC	1	-0.100051
PLD2_ARF1	Basal|DC	1	-0.0218044
EPHB2_EFNB2	Basal|DC	1	-0.268817
EPHB2_EFNB1	Basal|DC	1	-0.181149
EPHB3_EFNB1	Basal|DC	1	-0.0877334
EPHB4_EFNB1	Basal|DC	1	-0.182786
EPHA4_EFNB1	Basal|DC	1	-0.0816138
EFNB2_EPHB4	Basal|DC	1	-0.152003
EPHB2_EFNA5	Basal|DC	1	-0.131313
EPHA1_EFNA5	Basal|DC	1	-0.0499049
EPHA2_EFNA5	Basal|DC	1	0.138814
EFNB2_EPHB3	Basal|DC	1	-0.195946
EPHA1_EFNA4	Basal|DC	1	0.00288251
EPHA2_EFNA4	Basal|DC	1	0.185232
CEACAM1_CEACAM8	Basal|DC	1	-0.8863
FZD6_WNT5A	Basal|DC	1	-0.0174171
LRP6_CKLF	Basal|DC	0.0009	0.257011
CXCR1_CXCL5	Basal|DC	1	-0.274041
CXCR2_CXCL5	Basal|DC	1	-0.274041
CXCR1_YARS	Basal|DC	1	-0.0543923
CXCR1_CXCL6	Basal|DC	1	-0.274041
CXCR2_CXCL6	Basal|DC	1	-0.274041
IL15_IL15RA	Basal|DC	1	-0.0499049
LTBR_LTB	Basal|DC	1	0.0922074
DSG2_DSC3	Basal|DC	1	-0.0320936
DSC2_DSG2	Basal|DC	1	-0.155213
KLRG2_WNT5B	Basal|Delta-Gamma	1	-0.046921
CADM1_CADM1	Basal|Delta-Gamma	1	-0.378944
SPP1_CD44	Basal|Delta-Gamma	1	-0.336428
LGALS9_CD44	Basal|Delta-Gamma	1	-0.316528
FGF1_FGFR1	Basal|Delta-Gamma	1	0.0717627
FGF1_FGFR2	Basal|Delta-Gamma	1	0.0243197
CD44_FGFR2	Basal|Delta-Gamma	1	-0.148801
FGFR1_FGFR2	Basal|Delta-Gamma	1	-0.169745
SPP1_PTGER4	Basal|Delta-Gamma	1	-0.248108
LAMP1_FAM3C	Basal|Delta-Gamma	1	-0.248108
EGFR_TGFA	Basal|Delta-Gamma	1	-0.0558912
EGFR_MIF	Basal|Delta-Gamma	1	-0.251539
CD74_MIF	Basal|Delta-Gamma	1	-0.768568
EGFR_AREG	Basal|Delta-Gamma	1	0.138814
ICAM1_AREG	Basal|Delta-Gamma	1	0.10165
EGFR_GRN	Basal|Delta-Gamma	1	-0.323733
TNFRSF1A_GRN	Basal|Delta-Gamma	1	-0.405451
EGFR_BTC	Basal|Delta-Gamma	1	-0.0484122
ERBB3_BTC	Basal|Delta-Gamma	1	-0.26708
EGFR_COPA	Basal|Delta-Gamma	1	-0.254978
CD74_COPA	Basal|Delta-Gamma	1	-0.773491
EGFR_EPGN	Basal|Delta-Gamma	1	0.0129262
EGFR_HBEGF	Basal|Delta-Gamma	1	-0.634867
CD44_HBEGF	Basal|Delta-Gamma	1	-0.720232
CCL3_IDE	Basal|Delta-Gamma	1	-0.37707
GRN_SORT1	Basal|Delta-Gamma	1	-0.529073
COPA_SORT1	Basal|Delta-Gamma	1	-0.311148
CD200_CD200R1	Basal|Delta-Gamma	1	-0.0543923
TNF_DAG1	Basal|Delta-Gamma	1	-0.571322
LGALS9_DAG1	Basal|Delta-Gamma	1	-0.432455
TNF_NOTCH1	Basal|Delta-Gamma	1	-0.246395
TNF_TNFRSF1A	Basal|Delta-Gamma	1	0.015783
TNF_FAS	Basal|Delta-Gamma	1	-0.248108
TNF_CELSR2	Basal|Delta-Gamma	1	-0.312939
CXCL1_CXCR1	Basal|Delta-Gamma	1	-0.106249
CXCL2_CXCR1	Basal|Delta-Gamma	1	0.0398403
PPBP_CXCR1	Basal|Delta-Gamma	1	-0.0816138
CXCL3_CXCR1	Basal|Delta-Gamma	1	0.0398403
CXCL1_CXCR2	Basal|Delta-Gamma	1	-0.106249
CXCL2_CXCR2	Basal|Delta-Gamma	1	0.0398403
PPBP_CXCR2	Basal|Delta-Gamma	1	-0.0816138
CXCL3_CXCR2	Basal|Delta-Gamma	1	0.0398403
LGALS9_MET	Basal|Delta-Gamma	1	-0.320126
LGALS9_CD47	Basal|Delta-Gamma	1	-0.195946
LGALS9_PTPRK	Basal|Delta-Gamma	1	-0.330973
WNT5A_PTPRK	Basal|Delta-Gamma	1	-0.176251
LGALS9_COLEC12	Basal|Delta-Gamma	1	-0.215915
LGALS9_SORL1	Basal|Delta-Gamma	1	-0.161653
MDK_SORL1	Basal|Delta-Gamma	1	0.180148
TNFRSF11B_TNFSF10	Basal|Delta-Gamma	1	-0.258425
FGFR2_EPHA4	Basal|Delta-Gamma	1	0.187768
EFNA1_EPHA4	Basal|Delta-Gamma	1	-0.166503
EFNA4_EPHA4	Basal|Delta-Gamma	1	-0.187707
EFNA5_EPHA4	Basal|Delta-Gamma	1	-0.00868224
EFNB2_EPHA4	Basal|Delta-Gamma	1	-0.249822
WNT7B_FZD4	Basal|Delta-Gamma	1	0.169925
PLXNB2_PTN	Basal|Delta-Gamma	1	-0.327348
PLXNB2_SEMA4D	Basal|Delta-Gamma	1	-0.0969617
MIF_TNFRSF10D	Basal|Delta-Gamma	1	0.404903
EFNA1_EPHA1	Basal|Delta-Gamma	1	-0.129734
EFNA1_EPHA2	Basal|Delta-Gamma	1	-0.369595
CXCR6_CXCL16	Basal|Delta-Gamma	1	-0.639355
EREG_EGFR	Basal|Delta-Gamma	1	-0.120294
PLD2_ARF1	Basal|Delta-Gamma	1	-0.103147
EPHB2_EFNB2	Basal|Delta-Gamma	1	-0.28279
EPHB2_EFNB1	Basal|Delta-Gamma	1	-0.145605
EPHB3_EFNB1	Basal|Delta-Gamma	1	-0.0543923
EPHB4_EFNB1	Basal|Delta-Gamma	1	-0.147202
EPHA4_EFNB1	Basal|Delta-Gamma	1	-0.046921
EFNB2_EPHB4	Basal|Delta-Gamma	1	-0.152003
EPHB2_EFNA5	Basal|Delta-Gamma	1	-0.131313
EPHA1_EFNA5	Basal|Delta-Gamma	1	-0.0499049
EPHA2_EFNA5	Basal|Delta-Gamma	1	0.138814
EFNB2_EPHB3	Basal|Delta-Gamma	1	-0.212568
EPHA1_EFNA4	Basal|Delta-Gamma	1	0.00288251
EPHA2_EFNA4	Basal|Delta-Gamma	1	0.185232
CEACAM1_CEACAM8	Basal|Delta-Gamma	1	-0.929611
FZD6_WNT5A	Basal|Delta-Gamma	1	-0.0174171
LRP6_CKLF	Basal|Delta-Gamma	1	0.180148
CXCR1_CXCL5	Basal|Delta-Gamma	1	-0.300448
CXCR2_CXCL5	Basal|Delta-Gamma	1	-0.300448
CXCR1_YARS	Basal|Delta-Gamma	1	-0.0619024
CXCR1_CXCL6	Basal|Delta-Gamma	1	-0.300448
CXCR2_CXCL6	Basal|Delta-Gamma	1	-0.300448
IL15_IL15RA	Basal|Delta-Gamma	1	-0.217591
LTBR_LTB	Basal|Delta-Gamma	0.0009	0.759582
DSG2_DSC3	Basal|Delta-Gamma	1	-0.0320936
DSC2_DSG2	Basal|Delta-Gamma	1	-0.0831412
KLRG2_WNT5B	Basal|Endothelial	1	-0.118727
CADM1_CADM1	Basal|Endothelial	1	-0.279284
SPP1_CD44	Basal|Endothelial	1	-0.45799
LGALS9_CD44	Basal|Endothelial	1	-0.438307
FGF1_FGFR1	Basal|Endothelial	0.0009	0.356144
FGF1_FGFR2	Basal|Endothelial	1	0.0676387
CD44_FGFR2	Basal|Endothelial	1	-0.100051
FGFR1_FGFR2	Basal|Endothelial	1	-0.120294
SPP1_PTGER4	Basal|Endothelial	1	0.0579701
LAMP1_FAM3C	Basal|Endothelial	1	-0.152003
EGFR_TGFA	Basal|Endothelial	1	-0.0558912
EGFR_MIF	Basal|Endothelial	1	-0.284546
CD74_MIF	Basal|Endothelial	1	-0.816037
EGFR_AREG	Basal|Endothelial	1	-0.107803
ICAM1_AREG	Basal|Endothelial	1	-0.152003
EGFR_GRN	Basal|Endothelial	1	-0.293359
TNFRSF1A_GRN	Basal|Endothelial	1	-0.37146
EGFR_BTC	Basal|Endothelial	1	-0.0484122
ERBB3_BTC	Basal|Endothelial	1	-0.26708
EGFR_COPA	Basal|Endothelial	1	-0.109359
CD74_COPA	Basal|Endothelial	1	-0.571322
EGFR_EPGN	Basal|Endothelial	1	0.0129262
EGFR_HBEGF	Basal|Endothelial	1	-0.14401
CD44_HBEGF	Basal|Endothelial	1	-0.205896
CCL3_IDE	Basal|Endothelial	1	-0.249822
GRN_SORT1	Basal|Endothelial	1	-0.296899
COPA_SORT1	Basal|Endothelial	1	-0.107803
CD200_CD200R1	Basal|Endothelial	1	-0.0664274
TNF_DAG1	Basal|Endothelial	1	0.0786098
LGALS9_DAG1	Basal|Endothelial	0.218	0.168642
TNF_NOTCH1	Basal|Endothelial	1	-0.260152
TNF_TNFRSF1A	Basal|Endothelial	1	0.201634
TNF_FAS	Basal|Endothelial	1	0.186501
TNF_CELSR2	Basal|Endothelial	1	-0.378944
CXCL1_CXCR1	Basal|Endothelial	1	0.0813396
CXCL2_CXCR1	Basal|Endothelial	1	0.209141
PPBP_CXCR1	Basal|Endothelial	1	0.10165
CXCL3_CXCR1	Basal|Endothelial	1	0.209141
CXCL1_CXCR2	Basal|Endothelial	1	0.0813396
CXCL2_CXCR2	Basal|Endothelial	1	0.209141
PPBP_CXCR2	Basal|Endothelial	1	0.10165
CXCL3_CXCR2	Basal|Endothelial	1	0.209141
LGALS9_MET	Basal|Endothelial	1	-0.320126
LGALS9_CD47	Basal|Endothelial	0.984	-0.018878
LGALS9_PTPRK	Basal|Endothelial	1	-0.168123
WNT5A_PTPRK	Basal|Endothelial	1	-0.0291463
LGALS9_COLEC12	Basal|Endothelial	1	0.0621217
LGALS9_SORL1	Basal|Endothelial	1	-0.405451
MDK_SORL1	Basal|Endothelial	1	-0.00868224
TNFRSF11B_TNFSF10	Basal|Endothelial	1	-0.22095
FGFR2_EPHA4	Basal|Endothelial	1	0.454176
EFNA1_EPHA4	Basal|Endothelial	1	0.166073
EFNA4_EPHA4	Basal|Endothelial	1	0.149259
EFNA5_EPHA4	Basal|Endothelial	1	0.292782
EFNB2_EPHA4	Basal|Endothelial	1	0.100305
WNT7B_FZD4	Basal|Endothelial	1	0.169925
PLXNB2_PTN	Basal|Endothelial	1	-0.327348
PLXNB2_SEMA4D	Basal|Endothelial	1	-0.316528
MIF_TNFRSF10D	Basal|Endothelial	1	0.259423
EFNA1_EPHA1	Basal|Endothelial	1	0.0482362
EFNA1_EPHA2	Basal|Endothelial	1	-0.140826
CXCR6_CXCL16	Basal|Endothelial	1	-0.496142
EREG_EGFR	Basal|Endothelial	1	-0.120294
PLD2_ARF1	Basal|Endothelial	1	-0.199255
EPHB2_EFNB2	Basal|Endothelial	1	-0.0679388
EPHB2_EFNB1	Basal|Endothelial	1	0.0894982
EPHB3_EFNB1	Basal|Endothelial	1	0.167358
EPHB4_EFNB1	Basal|Endothelial	1	0.0881416
EPHA4_EFNB1	Basal|Endothelial	1	0.173767
EFNB2_EPHB4	Basal|Endothelial	1	-0.152003
EPHB2_EFNA5	Basal|Endothelial	1	-0.0969617
EPHA1_EFNA5	Basal|Endothelial	1	-0.0174171
EPHA2_EFNA5	Basal|Endothelial	1	0.167358
EFNB2_EPHB3	Basal|Endothelial	1	-0.212568
EPHA1_EFNA4	Basal|Endothelial	1	0.00288251
EPHA2_EFNA4	Basal|Endothelial	1	0.185232
CEACAM1_CEACAM8	Basal|Endothelial	1	-0.954557
FZD6_WNT5A	Basal|Endothelial	1	0.0949116
LRP6_CKLF	Basal|Endothelial	1	-0.0846703
CXCR1_CXCL5	Basal|Endothelial	1	-0.270556
CXCR2_CXCL5	Basal|Endothelial	1	-0.270556
CXCR1_YARS	Basal|Endothelial	1	0.119024
CXCR1_CXCL6	Basal|Endothelial	1	-0.270556
CXCR2_CXCL6	Basal|Endothelial	1	-0.270556
IL15_IL15RA	Basal|Endothelial	1	0.0962619
LTBR_LTB	Basal|Endothelial	1	-0.166503
DSG2_DSC3	Basal|Endothelial	1	-0.0320936
DSC2_DSG2	Basal|Endothelial	1	-0.123434
KLRG2_WNT5B	Basal|Fibroblasts	1	0.00863031
CADM1_CADM1	Basal|Fibroblasts	1	-0.274041
SPP1_CD44	Basal|Fibroblasts	1	-0.53952
LGALS9_CD44	Basal|Fibroblasts	1	-0.516636
FGF1_FGFR1	Basal|Fibroblasts	0.0009	0.753605
FGF1_FGFR2	Basal|Fibroblasts	1	0.0579701
CD44_FGFR2	Basal|Fibroblasts	1	-0.110916
FGFR1_FGFR2	Basal|Fibroblasts	1	-0.131313
SPP1_PTGER4	Basal|Fibroblasts	1	-0.152003
LAMP1_FAM3C	Basal|Fibroblasts	1	-0.121863
EGFR_TGFA	Basal|Fibroblasts	1	-0.0380063
EGFR_MIF	Basal|Fibroblasts	1	-0.428566
CD74_MIF	Basal|Fibroblasts	1	-1.02915
EGFR_AREG	Basal|Fibroblasts	1	-0.158429
ICAM1_AREG	Basal|Fibroblasts	1	-0.204233
EGFR_GRN	Basal|Fibroblasts	1	-0.139236
TNFRSF1A_GRN	Basal|Fibroblasts	1	-0.210897
EGFR_BTC	Basal|Fibroblasts	1	-0.00578235
ERBB3_BTC	Basal|Fibroblasts	1	-0.21927
EGFR_COPA	Basal|Fibroblasts	1	0
CD74_COPA	Basal|Fibroblasts	1	-0.42082
EGFR_EPGN	Basal|Fibroblasts	1	0.0129262
EGFR_HBEGF	Basal|Fibroblasts	1	-0.318326
CD44_HBEGF	Basal|Fibroblasts	1	-0.386468
CCL3_IDE	Basal|Fibroblasts	1	-0.345564
GRN_SORT1	Basal|Fibroblasts	1	-0.479955
COPA_SORT1	Basal|Fibroblasts	1	-0.26708
CD200_CD200R1	Basal|Fibroblasts	1	-0.0800879
TNF_DAG1	Basal|Fibroblasts	1	-0.277534
LGALS9_DAG1	Basal|Fibroblasts	1	-0.163268
TNF_NOTCH1	Basal|Fibroblasts	1	-0.347399
TNF_TNFRSF1A	Basal|Fibroblasts	1	0.0551957
TNF_FAS	Basal|Fibroblasts	1	-0.190997
TNF_CELSR2	Basal|Fibroblasts	1	-0.341903
CXCL1_CXCR1	Basal|Fibroblasts	1	-0.117161
CXCL2_CXCR1	Basal|Fibroblasts	1	0.0299829
PPBP_CXCR1	Basal|Fibroblasts	1	-0.0923402
CXCL3_CXCR1	Basal|Fibroblasts	1	0.0299829
CXCL1_CXCR2	Basal|Fibroblasts	1	-0.117161
CXCL2_CXCR2	Basal|Fibroblasts	1	0.0299829
PPBP_CXCR2	Basal|Fibroblasts	1	-0.0923402
CXCL3_CXCR2	Basal|Fibroblasts	1	0.0299829
LGALS9_MET	Basal|Fibroblasts	1	-0.296899
LGALS9_CD47	Basal|Fibroblasts	0.219	0.169925
LGALS9_PTPRK	Basal|Fibroblasts	1	-0.279284
WNT5A_PTPRK	Basal|Fibroblasts	1	-0.129734
LGALS9_COLEC12	Basal|Fibroblasts	0.0009	0.624803
LGALS9_SORL1	Basal|Fibroblasts	1	-0.369595
MDK_SORL1	Basal|Fibroblasts	1	0.0186342
TNFRSF11B_TNFSF10	Basal|Fibroblasts	1	-0.189351
FGFR2_EPHA4	Basal|Fibroblasts	1	0.243669
EFNA1_EPHA4	Basal|Fibroblasts	1	-0.0954196
EFNA4_EPHA4	Basal|Fibroblasts	1	-0.117161
EFNA5_EPHA4	Basal|Fibroblasts	1	0.0551957
EFNB2_EPHA4	Basal|Fibroblasts	1	-0.176251
WNT7B_FZD4	Basal|Fibroblasts	1	0.302173
PLXNB2_PTN	Basal|Fibroblasts	0.0009	0.349365
PLXNB2_SEMA4D	Basal|Fibroblasts	1	-0.281036
MIF_TNFRSF10D	Basal|Fibroblasts	1	0.327687
EFNA1_EPHA1	Basal|Fibroblasts	1	-0.0350469
EFNA1_EPHA2	Basal|Fibroblasts	1	-0.314733
CXCR6_CXCL16	Basal|Fibroblasts	1	-0.409278
EREG_EGFR	Basal|Fibroblasts	1	0.133564
PLD2_ARF1	Basal|Fibroblasts	1	-0.179515
EPHB2_EFNB2	Basal|Fibroblasts	1	-0.2567
EPHB2_EFNB1	Basal|Fibroblasts	1	0.0229004
EPHB3_EFNB1	Basal|Fibroblasts	1	0.104337
EPHB4_EFNB1	Basal|Fibroblasts	1	0.0214797
EPHA4_EFNB1	Basal|Fibroblasts	1	0.111031
EFNB2_EPHB4	Basal|Fibroblasts	1	-0.0365259
EPHB2_EFNA5	Basal|Fibroblasts	1	-0.0306192
EPHA1_EFNA5	Basal|Fibroblasts	1	0.045443
EPHA2_EFNA5	Basal|Fibroblasts	1	0.222805
EFNB2_EPHB3	Basal|Fibroblasts	1	-0.145605
EPHA1_EFNA4	Basal|Fibroblasts	1	0.0538064
EPHA2_EFNA4	Basal|Fibroblasts	1	0.230203
CEACAM1_CEACAM8	Basal|Fibroblasts	1	-0.940645
FZD6_WNT5A	Basal|Fibroblasts	1	0.202888
LRP6_CKLF	Basal|Fibroblasts	1	-0.117161
CXCR1_CXCL5	Basal|Fibroblasts	1	-0.24127
CXCR2_CXCL5	Basal|Fibroblasts	1	-0.24127
CXCR1_YARS	Basal|Fibroblasts	1	-0.0588937
CXCR1_CXCL6	Basal|Fibroblasts	1	-0.24127
CXCR2_CXCL6	Basal|Fibroblasts	1	-0.24127
IL15_IL15RA	Basal|Fibroblasts	1	-0.0649175
LTBR_LTB	Basal|Fibroblasts	1	-0.145605
DSG2_DSC3	Basal|Fibroblasts	1	-0.0144996
DSC2_DSG2	Basal|Fibroblasts	1	-0.148801
KLRG2_WNT5B	Basal|M2	1	-0.118727
CADM1_CADM1	Basal|M2	1	-0.217591
SPP1_CD44	Basal|M2	1	-0.360305
LGALS9_CD44	Basal|M2	1	-0.340075
FGF1_FGFR1	Basal|M2	1	0.136191
FGF1_FGFR2	Basal|M2	1	0.0922074
CD44_FGFR2	Basal|M2	1	-0.0724828
FGFR1_FGFR2	Basal|M2	1	-0.093879
SPP1_PTGER4	Basal|M2	1	-0.131313
LAMP1_FAM3C	Basal|M2	1	-0.145605
EGFR_TGFA	Basal|M2	1	-0.0558912
EGFR_MIF	Basal|M2	1	-0.58208
CD74_MIF	Basal|M2	1	-1.26882
EGFR_AREG	Basal|M2	1	-0.181149
ICAM1_AREG	Basal|M2	1	-0.227692
EGFR_GRN	Basal|M2	1	1.07039
TNFRSF1A_GRN	Basal|M2	0.0009	1.04054
EGFR_BTC	Basal|M2	1	-0.0484122
ERBB3_BTC	Basal|M2	1	-0.26708
EGFR_COPA	Basal|M2	1	-0.0439433
CD74_COPA	Basal|M2	1	-0.479955
EGFR_EPGN	Basal|M2	1	0.0129262
EGFR_HBEGF	Basal|M2	1	-0.384584
CD44_HBEGF	Basal|M2	1	-0.45799
CCL3_IDE	Basal|M2	1	-0.296899
GRN_SORT1	Basal|M2	1	-0.529073
COPA_SORT1	Basal|M2	1	-0.311148
CD200_CD200R1	Basal|M2	1	-0.0409718
TNF_DAG1	Basal|M2	1	-0.395929
LGALS9_DAG1	Basal|M2	1	-0.272297
TNF_NOTCH1	Basal|M2	1	-0.169745
TNF_TNFRSF1A	Basal|M2	1	0.196607
TNF_FAS	Basal|M2	1	-0.37146
TNF_CELSR2	Basal|M2	1	-0.378944
CXCL1_CXCR1	Basal|M2	1	-0.0439433
CXCL2_CXCR1	Basal|M2	1	0.0949116
PPBP_CXCR1	Basal|M2	1	-0.0218044
CXCL3_CXCR1	Basal|M2	1	0.0949116
CXCL1_CXCR2	Basal|M2	1	-0.0439433
CXCL2_CXCR2	Basal|M2	1	0.0949116
PPBP_CXCR2	Basal|M2	1	-0.0218044
CXCL3_CXCR2	Basal|M2	1	0.0949116
LGALS9_MET	Basal|M2	1	-0.320126
LGALS9_CD47	Basal|M2	0.268	0.191563
LGALS9_PTPRK	Basal|M2	1	-0.32916
WNT5A_PTPRK	Basal|M2	1	-0.174621
LGALS9_COLEC12	Basal|M2	1	-0.0484122
LGALS9_SORL1	Basal|M2	1	-0.39973
MDK_SORL1	Basal|M2	1	-0.00288828
TNFRSF11B_TNFSF10	Basal|M2	1	-0.155213
FGFR2_EPHA4	Basal|M2	1	0.187768
EFNA1_EPHA4	Basal|M2	1	-0.166503
EFNA4_EPHA4	Basal|M2	1	-0.187707
EFNA5_EPHA4	Basal|M2	1	-0.00868224
EFNB2_EPHA4	Basal|M2	1	-0.249822
WNT7B_FZD4	Basal|M2	1	0.169925
PLXNB2_PTN	Basal|M2	1	-0.327348
PLXNB2_SEMA4D	Basal|M2	1	-0.316528
MIF_TNFRSF10D	Basal|M2	1	0.333424
EFNA1_EPHA1	Basal|M2	1	0.00575927
EFNA1_EPHA2	Basal|M2	1	-0.369595
CXCR6_CXCL16	Basal|M2	1	0.0299829
EREG_EGFR	Basal|M2	1	-0.00723157
PLD2_ARF1	Basal|M2	1	-0.251539
EPHB2_EFNB2	Basal|M2	1	-0.28279
EPHB2_EFNB1	Basal|M2	1	-0.109359
EPHB3_EFNB1	Basal|M2	1	-0.0203404
EPHB4_EFNB1	Basal|M2	1	-0.110916
EPHA4_EFNB1	Basal|M2	1	-0.0144996
EFNB2_EPHB4	Basal|M2	1	-0.152003
EPHB2_EFNA5	Basal|M2	1	-0.086201
EPHA1_EFNA5	Basal|M2	1	-0.00868224
EPHA2_EFNA5	Basal|M2	1	0.175045
EFNB2_EPHB3	Basal|M2	1	-0.163268
EPHA1_EFNA4	Basal|M2	1	0.00288251
EPHA2_EFNA4	Basal|M2	1	0.185232
CEACAM1_CEACAM8	Basal|M2	1	-0.859876
FZD6_WNT5A	Basal|M2	1	0.0426443
LRP6_CKLF	Basal|M2	0.0009	0.426533
CXCR1_CXCL5	Basal|M2	1	-0.229382
CXCR2_CXCL5	Basal|M2	1	-0.229382
CXCR1_YARS	Basal|M2	1	-0.018878
CXCR1_CXCL6	Basal|M2	1	-0.229382
CXCR2_CXCL6	Basal|M2	1	-0.229382
IL15_IL15RA	Basal|M2	1	-0.217591
LTBR_LTB	Basal|M2	1	-0.166503
DSG2_DSC3	Basal|M2	1	-0.0320936
DSC2_DSG2	Basal|M2	1	-0.0831412
KLRG2_WNT5B	Basal|MDSC	1	-0.118727
CADM1_CADM1	Basal|MDSC	1	-0.351074
SPP1_CD44	Basal|MDSC	1	0.178874
LGALS9_CD44	Basal|MDSC	0.96	0.192825
FGF1_FGFR1	Basal|MDSC	1	0.0129262
FGF1_FGFR2	Basal|MDSC	1	0.0243197
CD44_FGFR2	Basal|MDSC	1	-0.148801
FGFR1_FGFR2	Basal|MDSC	1	-0.169745
SPP1_PTGER4	Basal|MDSC	1	-0.286304
LAMP1_FAM3C	Basal|MDSC	1	-0.28279
EGFR_TGFA	Basal|MDSC	1	-0.0439433
EGFR_MIF	Basal|MDSC	1	-0.114035
CD74_MIF	Basal|MDSC	1	-0.575615
EGFR_AREG	Basal|MDSC	1	-0.161653
ICAM1_AREG	Basal|MDSC	1	-0.207561
EGFR_GRN	Basal|MDSC	1	-0.237864
TNFRSF1A_GRN	Basal|MDSC	1	-0.312939
EGFR_BTC	Basal|MDSC	1	-0.0484122
ERBB3_BTC	Basal|MDSC	1	-0.26708
EGFR_COPA	Basal|MDSC	1	-0.239566
CD74_COPA	Basal|MDSC	1	-0.753896
EGFR_EPGN	Basal|MDSC	1	0.0129262
EGFR_HBEGF	Basal|MDSC	1	-0.634867
CD44_HBEGF	Basal|MDSC	1	-0.720232
CCL3_IDE	Basal|MDSC	1	-0.428566
GRN_SORT1	Basal|MDSC	1	-0.494109
COPA_SORT1	Basal|MDSC	1	-0.281036
CD200_CD200R1	Basal|MDSC	1	-0.0724828
TNF_DAG1	Basal|MDSC	1	-0.579922
LGALS9_DAG1	Basal|MDSC	1	-0.440263
TNF_NOTCH1	Basal|MDSC	1	-0.378944
TNF_TNFRSF1A	Basal|MDSC	1	-0.194295
TNF_FAS	Basal|MDSC	1	0.412511
TNF_CELSR2	Basal|MDSC	1	-0.336428
CXCL1_CXCR1	Basal|MDSC	1	0.233888
CXCL2_CXCR1	Basal|MDSC	1	0.349365
PPBP_CXCR1	Basal|MDSC	1	0.253384
CXCL3_CXCR1	Basal|MDSC	1	0.349365
CXCL1_CXCR2	Basal|MDSC	1	0.233888
CXCL2_CXCR2	Basal|MDSC	1	0.349365
PPBP_CXCR2	Basal|MDSC	1	0.253384
CXCL3_CXCR2	Basal|MDSC	1	0.349365
LGALS9_MET	Basal|MDSC	1	-0.284546
LGALS9_CD47	Basal|MDSC	1	-0.258425
LGALS9_PTPRK	Basal|MDSC	1	-0.347399
WNT5A_PTPRK	Basal|MDSC	1	-0.190997
LGALS9_COLEC12	Basal|MDSC	1	-0.192645
LGALS9_SORL1	Basal|MDSC	1	-0.155213
MDK_SORL1	Basal|MDSC	1	0.186501
TNFRSF11B_TNFSF10	Basal|MDSC	1	-0.15682
FGFR2_EPHA4	Basal|MDSC	1	0.199123
EFNA1_EPHA4	Basal|MDSC	1	-0.152003
EFNA4_EPHA4	Basal|MDSC	1	-0.172994
EFNA5_EPHA4	Basal|MDSC	1	0.00432161
EFNB2_EPHA4	Basal|MDSC	1	-0.234465
WNT7B_FZD4	Basal|MDSC	1	0.169925
PLXNB2_PTN	Basal|MDSC	1	-0.311148
PLXNB2_SEMA4D	Basal|MDSC	0.0009	0.467801
MIF_TNFRSF10D	Basal|MDSC	1	0.299831
EFNA1_EPHA1	Basal|MDSC	1	-0.0985055
EFNA1_EPHA2	Basal|MDSC	1	-0.340075
CXCR6_CXCL16	Basal|MDSC	1	-0.53952
EREG_EGFR	Basal|MDSC	1	-0.077041
PLD2_ARF1	Basal|MDSC	1	-0.293359
EPHB2_EFNB2	Basal|MDSC	1	-0.268817
EPHB2_EFNB1	Basal|MDSC	1	-0.148801
EPHB3_EFNB1	Basal|MDSC	1	-0.0558912
EPHB4_EFNB1	Basal|MDSC	1	-0.150401
EPHA4_EFNB1	Basal|MDSC	1	-0.0499049
EFNB2_EPHB4	Basal|MDSC	1	-0.152003
EPHB2_EFNA5	Basal|MDSC	1	-0.131313
EPHA1_EFNA5	Basal|MDSC	1	-0.0499049
EPHA2_EFNA5	Basal|MDSC	1	0.138814
EFNB2_EPHB3	Basal|MDSC	1	-0.205896
EPHA1_EFNA4	Basal|MDSC	1	0.0129262
EPHA2_EFNA4	Basal|MDSC	1	0.192825
CEACAM1_CEACAM8	Basal|MDSC	1	-0.940645
FZD6_WNT5A	Basal|MDSC	1	-0.0174171
LRP6_CKLF	Basal|MDSC	1	-0.0306192
CXCR1_CXCL5	Basal|MDSC	1	-0.24127
CXCR2_CXCL5	Basal|MDSC	1	-0.24127
CXCR1_YARS	Basal|MDSC	1	-0.163268
CXCR1_CXCL6	Basal|MDSC	1	-0.24127
CXCR2_CXCL6	Basal|MDSC	1	-0.24127
IL15_IL15RA	Basal|MDSC	1	-0.155213
LTBR_LTB	Basal|MDSC	0.0009	0.350497
DSG2_DSC3	Basal|MDSC	1	-0.0320936
DSC2_DSG2	Basal|MDSC	1	-0.136062
KLRG2_WNT5B	Basal|NKT	1	-0.118727
CADM1_CADM1	Basal|NKT	1	-0.327348
SPP1_CD44	Basal|NKT	1	-0.508403
LGALS9_CD44	Basal|NKT	1	-0.486004
FGF1_FGFR1	Basal|NKT	1	0.0440443
FGF1_FGFR2	Basal|NKT	1	0.0538064
CD44_FGFR2	Basal|NKT	1	-0.115597
FGFR1_FGFR2	Basal|NKT	1	-0.137648
SPP1_PTGER4	Basal|NKT	1	-0.16004
LAMP1_FAM3C	Basal|NKT	1	-0.237864
EGFR_TGFA	Basal|NKT	1	-0.0291463
EGFR_MIF	Basal|NKT	1	-0.26708
CD74_MIF	Basal|NKT	1	-0.790859
EGFR_AREG	Basal|NKT	1	-0.145605
ICAM1_AREG	Basal|NKT	1	-0.189351
EGFR_GRN	Basal|NKT	1	-0.375197
TNFRSF1A_GRN	Basal|NKT	1	-0.45799
EGFR_BTC	Basal|NKT	1	-0.00868224
ERBB3_BTC	Basal|NKT	1	-0.22095
EGFR_COPA	Basal|NKT	1	-0.132894
CD74_COPA	Basal|NKT	1	-0.60165
EGFR_EPGN	Basal|NKT	1	0.0129262
EGFR_HBEGF	Basal|NKT	1	-0.637109
CD44_HBEGF	Basal|NKT	1	-0.724993
CCL3_IDE	Basal|NKT	1	-0.260152
GRN_SORT1	Basal|NKT	1	-0.529073
COPA_SORT1	Basal|NKT	1	-0.311148
CD200_CD200R1	Basal|NKT	1	-0.106249
TNF_DAG1	Basal|NKT	1	-0.481969
LGALS9_DAG1	Basal|NKT	1	-0.351074
TNF_NOTCH1	Basal|NKT	1	-0.239566
TNF_TNFRSF1A	Basal|NKT	1	-0.169745
TNF_FAS	Basal|NKT	1	-0.232769
TNF_CELSR2	Basal|NKT	1	-0.378944
CXCL1_CXCR1	Basal|NKT	1	0.0186342
CXCL2_CXCR1	Basal|NKT	1	0.153157
PPBP_CXCR1	Basal|NKT	1	0.041243
CXCL3_CXCR1	Basal|NKT	1	0.153157
CXCL1_CXCR2	Basal|NKT	1	0.0186342
CXCL2_CXCR2	Basal|NKT	1	0.153157
PPBP_CXCR2	Basal|NKT	1	0.041243
CXCL3_CXCR2	Basal|NKT	1	0.153157
LGALS9_MET	Basal|NKT	1	-0.2567
LGALS9_CD47	Basal|NKT	0.075	0.230203
LGALS9_PTPRK	Basal|NKT	1	-0.362158
WNT5A_PTPRK	Basal|NKT	1	-0.204233
LGALS9_COLEC12	Basal|NKT	1	-0.153607
LGALS9_SORL1	Basal|NKT	1	-0.16004
MDK_SORL1	Basal|NKT	1	0.181421
TNFRSF11B_TNFSF10	Basal|NKT	1	-0.14401
FGFR2_EPHA4	Basal|NKT	1	0.187768
EFNA1_EPHA4	Basal|NKT	1	-0.166503
EFNA4_EPHA4	Basal|NKT	1	-0.187707
EFNA5_EPHA4	Basal|NKT	1	-0.00868224
EFNB2_EPHA4	Basal|NKT	1	-0.249822
WNT7B_FZD4	Basal|NKT	1	0.169925
PLXNB2_PTN	Basal|NKT	1	-0.327348
PLXNB2_SEMA4D	Basal|NKT	1	-0.128156
MIF_TNFRSF10D	Basal|NKT	1	0.304511
EFNA1_EPHA1	Basal|NKT	1	-0.0923402
EFNA1_EPHA2	Basal|NKT	1	-0.369595
CXCR6_CXCL16	Basal|NKT	1	-0.541618
EREG_EGFR	Basal|NKT	1	-0.0954196
PLD2_ARF1	Basal|NKT	1	-0.112475
EPHB2_EFNB2	Basal|NKT	1	-0.28279
EPHB2_EFNB1	Basal|NKT	1	-0.093879
EPHB3_EFNB1	Basal|NKT	1	-0.00578235
EPHB4_EFNB1	Basal|NKT	1	-0.0954196
EPHA4_EFNB1	Basal|NKT	1	0.00144197
EFNB2_EPHB4	Basal|NKT	1	-0.152003
EPHB2_EFNA5	Basal|NKT	1	-0.131313
EPHA1_EFNA5	Basal|NKT	1	-0.0499049
EPHA2_EFNA5	Basal|NKT	1	0.138814
EFNB2_EPHB3	Basal|NKT	1	-0.212568
EPHA1_EFNA4	Basal|NKT	1	0.00288251
EPHA2_EFNA4	Basal|NKT	1	0.185232
CEACAM1_CEACAM8	Basal|NKT	1	-0.971431
FZD6_WNT5A	Basal|NKT	1	-0.0174171
LRP6_CKLF	Basal|NKT	1	0.0579701
CXCR1_CXCL5	Basal|NKT	1	-0.251539
CXCR2_CXCL5	Basal|NKT	1	-0.251539
CXCR1_YARS	Basal|NKT	1	-0.0588937
CXCR1_CXCL6	Basal|NKT	1	-0.251539
CXCR2_CXCL6	Basal|NKT	1	-0.251539
IL15_IL15RA	Basal|NKT	1	-0.217591
LTBR_LTB	Basal|NKT	0.0009	0.541019
DSG2_DSC3	Basal|NKT	1	0.00432161
DSC2_DSG2	Basal|NKT	1	-0.134477
KLRG2_WNT5B	Basal|Progenitor	1	0.0129262
CADM1_CADM1	Basal|Progenitor	0.0009	0.190299
SPP1_CD44	Basal|Progenitor	1	0.378512
LGALS9_CD44	Basal|Progenitor	0.0009	0.390668
FGF1_FGFR1	Basal|Progenitor	1	0.129613
FGF1_FGFR2	Basal|Progenitor	1	0.168642
CD44_FGFR2	Basal|Progenitor	1	0.0129262
FGFR1_FGFR2	Basal|Progenitor	1	-0.00578235
SPP1_PTGER4	Basal|Progenitor	1	0.0482362
LAMP1_FAM3C	Basal|Progenitor	0.0009	0.149259
EGFR_TGFA	Basal|Progenitor	1	0.189034
EGFR_MIF	Basal|Progenitor	1	0.31034
CD74_MIF	Basal|Progenitor	1	-0.018878
EGFR_AREG	Basal|Progenitor	1	0.303342
ICAM1_AREG	Basal|Progenitor	0.0009	0.27023
EGFR_GRN	Basal|Progenitor	1	0.257011
TNFRSF1A_GRN	Basal|Progenitor	0.0009	0.204141
EGFR_BTC	Basal|Progenitor	1	0.237564
ERBB3_BTC	Basal|Progenitor	1	0.0593553
EGFR_COPA	Basal|Progenitor	1	0.209141
CD74_COPA	Basal|Progenitor	1	-0.148801
EGFR_EPGN	Basal|Progenitor	1	0.0607392
EGFR_HBEGF	Basal|Progenitor	1	0.442545
CD44_HBEGF	Basal|Progenitor	0.0009	0.40163
CCL3_IDE	Basal|Progenitor	1	0
GRN_SORT1	Basal|Progenitor	1	-0.0816138
COPA_SORT1	Basal|Progenitor	0.0009	0.0827026
CD200_CD200R1	Basal|Progenitor	1	0.222805
TNF_DAG1	Basal|Progenitor	1	0.0370307
LGALS9_DAG1	Basal|Progenitor	0.329	0.129613
TNF_NOTCH1	Basal|Progenitor	1	-0.155213
TNF_TNFRSF1A	Basal|Progenitor	1	-0.199255
TNF_FAS	Basal|Progenitor	1	-0.22095
TNF_CELSR2	Basal|Progenitor	1	-0.0439433
CXCL1_CXCR1	Basal|Progenitor	1	-0.0892673
CXCL2_CXCR1	Basal|Progenitor	1	0.0538064
PPBP_CXCR1	Basal|Progenitor	1	-0.0664274
CXCL3_CXCR1	Basal|Progenitor	1	0.0538064
CXCL1_CXCR2	Basal|Progenitor	1	-0.0892673
CXCL2_CXCR2	Basal|Progenitor	1	0.0538064
PPBP_CXCR2	Basal|Progenitor	1	-0.0664274
CXCL3_CXCR2	Basal|Progenitor	1	0.0538064
LGALS9_MET	Basal|Progenitor	0.334	0.16221
LGALS9_CD47	Basal|Progenitor	1	0.0524159
LGALS9_PTPRK	Basal|Progenitor	0.015	0.171207
WNT5A_PTPRK	Basal|Progenitor	1	0.282143
LGALS9_COLEC12	Basal|Progenitor	1	-0.155213
LGALS9_SORL1	Basal|Progenitor	0.007	0.189034
MDK_SORL1	Basal|Progenitor	0.0009	0.464668
TNFRSF11B_TNFSF10	Basal|Progenitor	1	0.166073
FGFR2_EPHA4	Basal|Progenitor	0.0009	0.501821
EFNA1_EPHA4	Basal|Progenitor	0.0009	0.22404
EFNA4_EPHA4	Basal|Progenitor	1	0.206643
EFNA5_EPHA4	Basal|Progenitor	1	0.345964
EFNB2_EPHA4	Basal|Progenitor	0.773	0.159629
WNT7B_FZD4	Basal|Progenitor	1	0.27023
PLXNB2_PTN	Basal|Progenitor	1	-0.305788
PLXNB2_SEMA4D	Basal|Progenitor	1	-0.163268
MIF_TNFRSF10D	Basal|Progenitor	1	0.432959
EFNA1_EPHA1	Basal|Progenitor	1	0.126973
EFNA1_EPHA2	Basal|Progenitor	0.0009	0.352759
CXCR6_CXCL16	Basal|Progenitor	1	0.0786098
EREG_EGFR	Basal|Progenitor	1	0.14274
[truncated: 14,017 more rows]
